# Supplementary material
Source: publisher site journal article supplement (https://www.dovepress.com/article/556459)
Supplement: Supplementary file 1 [file Supplementary%20files.docx]

**Supplementary Appendix**

**For**

**Global patterns, temporal trends, and potential non-infectious risk factors for Burkitt lymphoma from 1990 to 2021: Estimations and projections to 2040**

[**Figure S1** Distributions of health burden in age and sex for Burkitt lymphoma among GBD super regions in 2021. 3](#_Toc214391642)

[**Figure S2** Global percentage changes in the incidence (A), mortality (B), prevalence (C), and DALYs (D) of Burkitt lymphoma by age and sex, 1990-2021. 11](#_Toc214391643)

[**Figure S3** Projections for global health burden rates of Burkitt lymphoma by sex, all ages, 2021-2040. 12](#_Toc214391644)

[**Figure S4** Projections for health burden rates of Burkitt lymphoma among GBD super regions, all ages, both sexes, 2021-2040. 13](#_Toc214391645)

[**Figure S5** Projections for global health burden rates of Burkitt lymphoma by age, both sexes, 2021-2040. 14](#_Toc214391646)

[**Figure S6A** Potential risk factors for global incidence and mortality rates of Burkitt lymphoma by sex in 2021, per 100,000 person-years, < 20 years old. 15](#_Toc214391647)

[**Figure S6B** Potential risk factors for global incidence and mortality rates of Burkitt lymphoma by sex in 2021, per 100,000 person-years, 20-54 years old. 16](#_Toc214391648)

[**Figure S6C** Potential risk factors for global incidence and mortality rates of Burkitt lymphoma by sex in 2021, per 100,000 person-years, > 54 years old. 17](#_Toc214391649)

[**Figure S7A** The correlation between potential risk factors and global incidence and mortality of Burkitt lymphoma by sex in 2021, all ages. 18](#_Toc214391650)

[**Figure S7B** The correlation between potential risk factors and global incidence and mortality of Burkitt lymphoma by sex in 2021, < 20 years old. 19](#_Toc214391651)

[**Figure S7C** The correlation between potential risk factors and global incidence and mortality of Burkitt lymphoma by sex in 2021, 20-54 years old. 20](#_Toc214391652)

[**Figure S7D** The correlation between potential risk factors and global incidence and mortality of Burkitt lymphoma by sex in 2021, > 54 years old. 21](#_Toc214391653)

[**Table S1** Age-standardized incidence and mortality rate (95% confidence interval) of Burkitt lymphoma in 1990 and 2021, percentage changes in rates, and AAPC from 1990 to 2021 22](#_Toc214391654)

[**Table S2** Age-standardized rate of prevalence and DALYs (95% confidence interval) of Burkitt lymphoma in 1990 and 2021, percentage changes, and AAPC from 1990 to 2021 26](#_Toc214391655)

[**Table S3** The contribution of population growth, population ageing, age-specific prevalence rate variations, and disease severity to the total percent change in DALYs for Burkitt lymphoma between 1990 and 2021 by region 30](#_Toc214391656)

[**Table S4** Projections of AAPCs (95% confidence interval) in Burkitt lymphoma health burden rates by age group, per 100,000 person-years, 2021-2040 32](#_Toc214391657)

[**GATHER checklist of information that should be included in reports of global health estimates.** 33](#_Toc214391658)

**Figure S1** Distributions of health burden in age and sex for Burkitt lymphoma among GBD super regions in 2021.


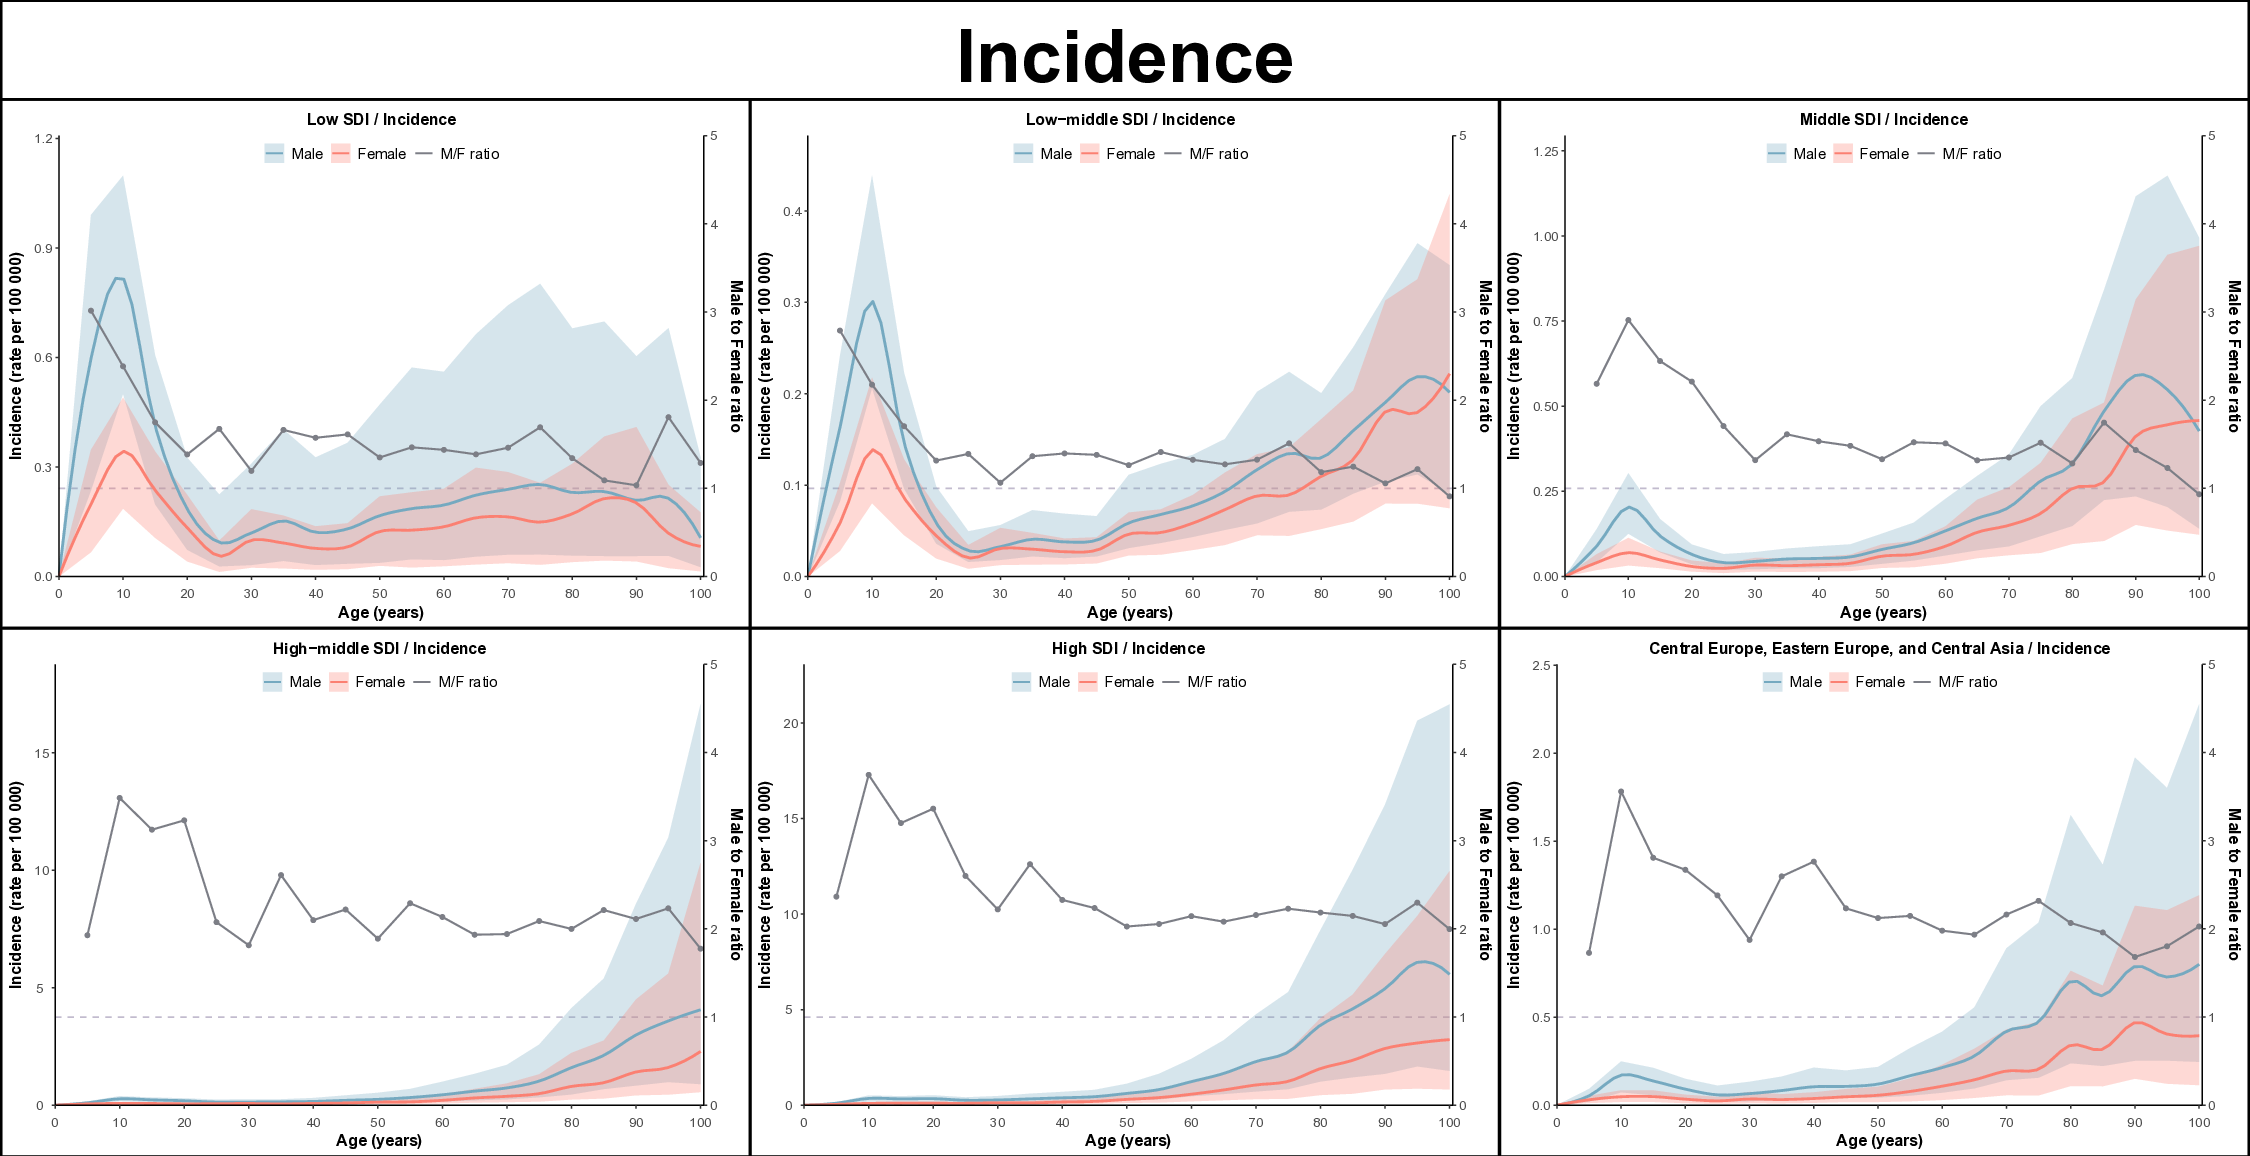


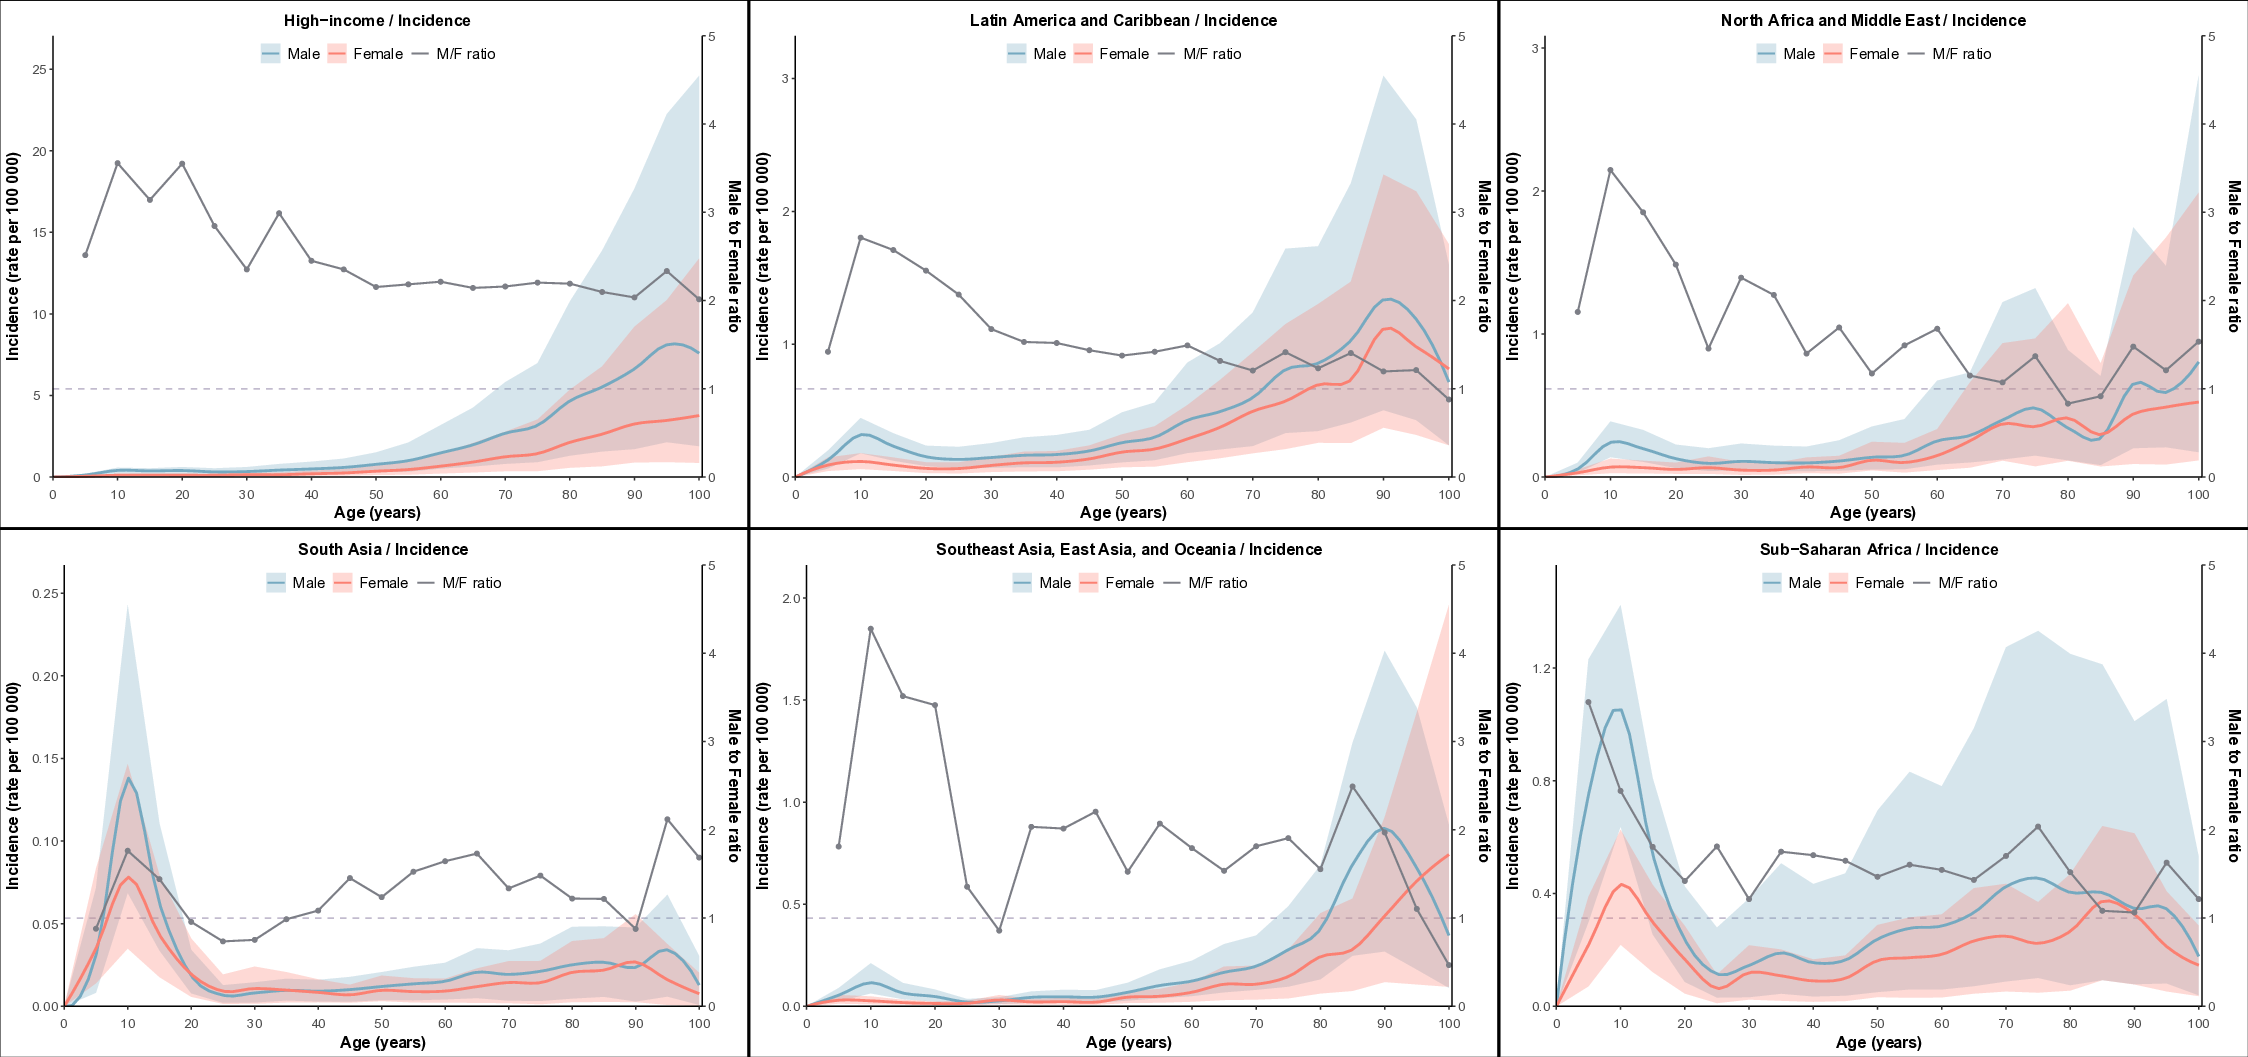


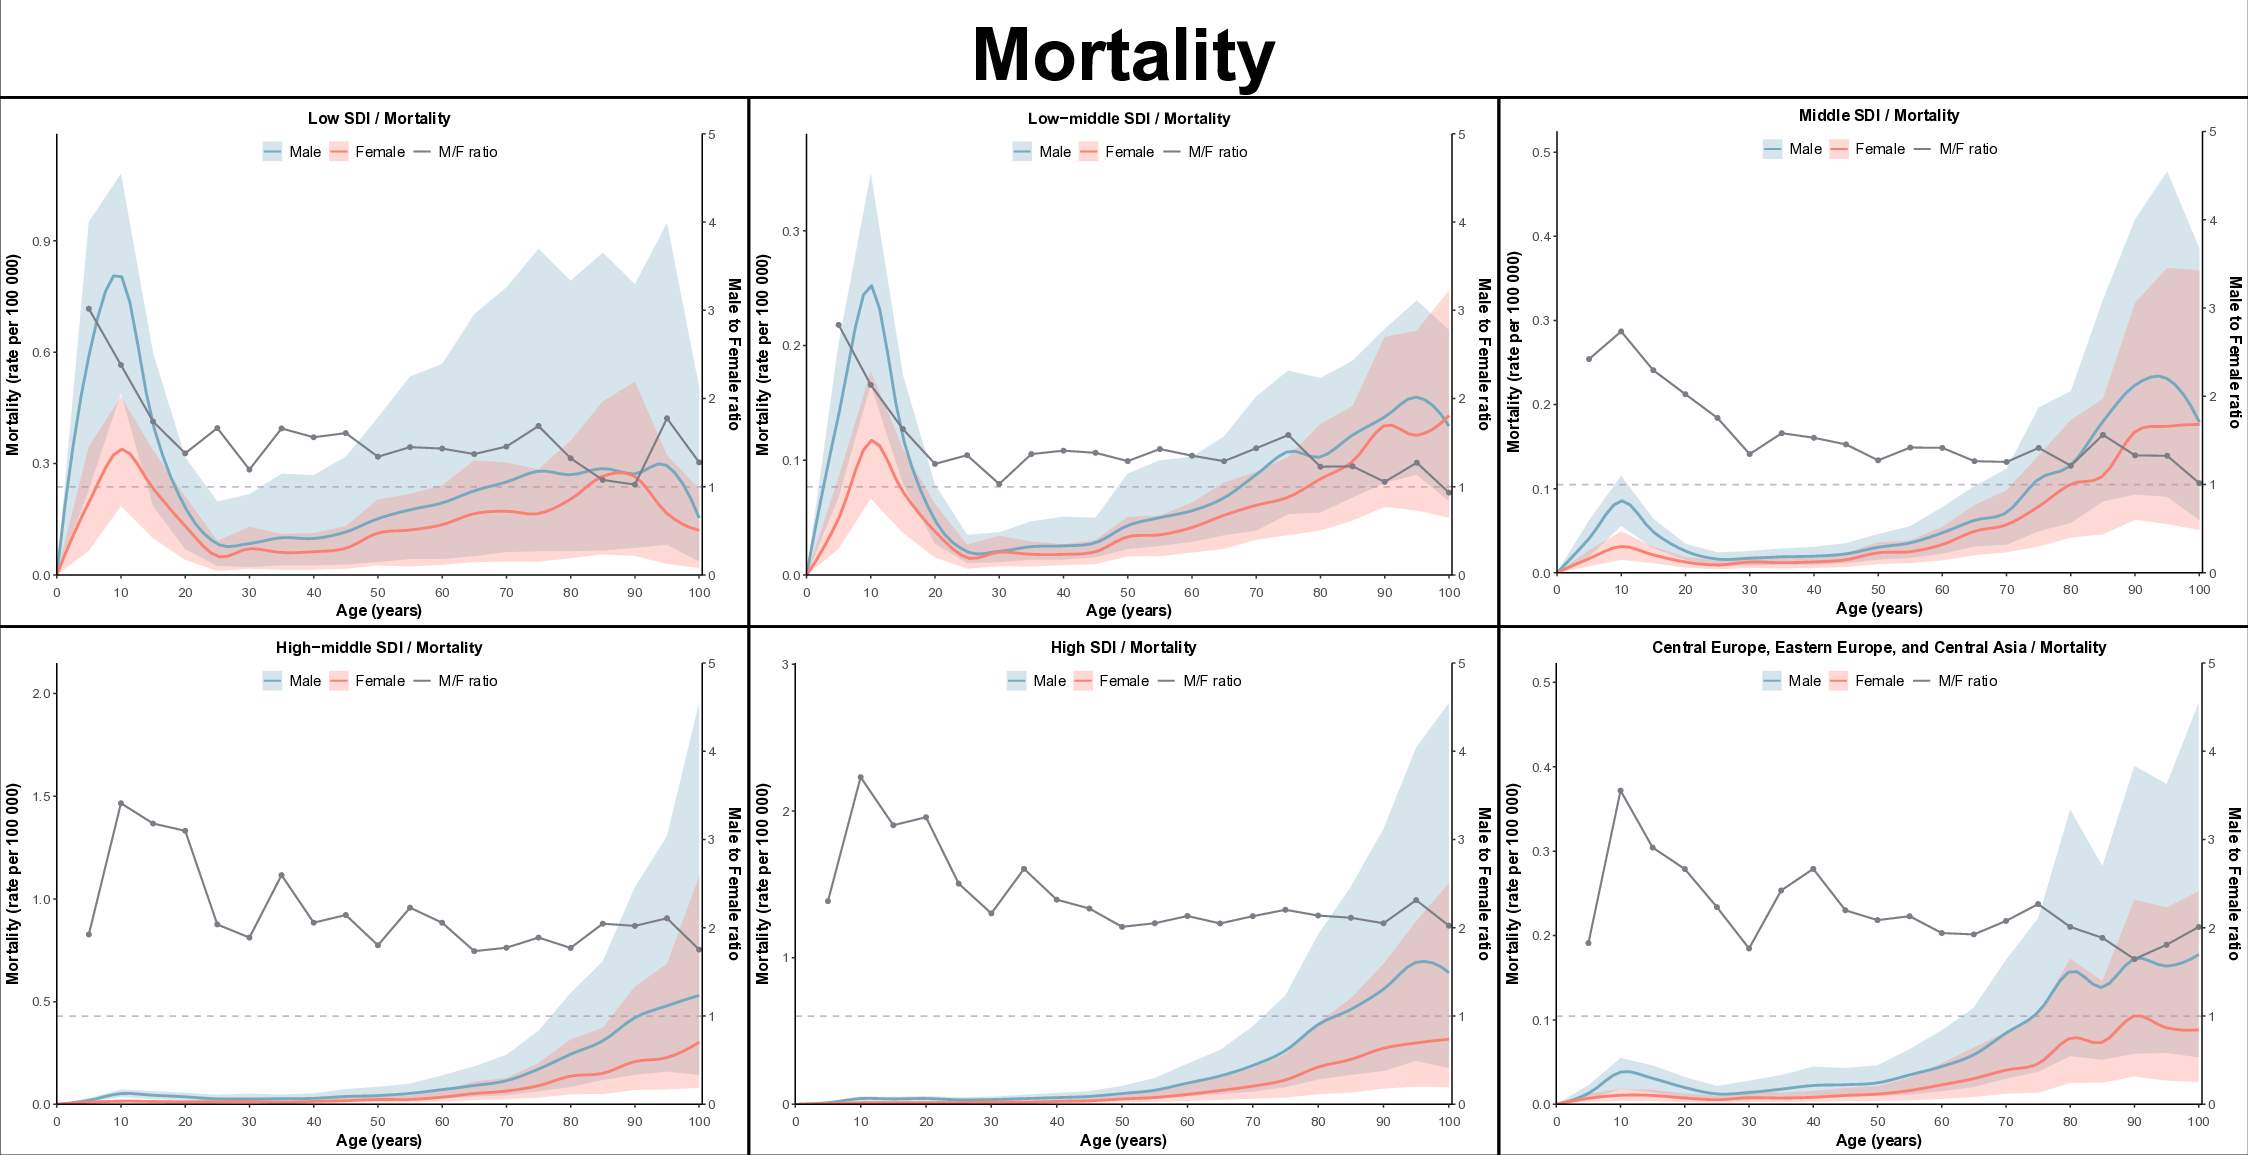


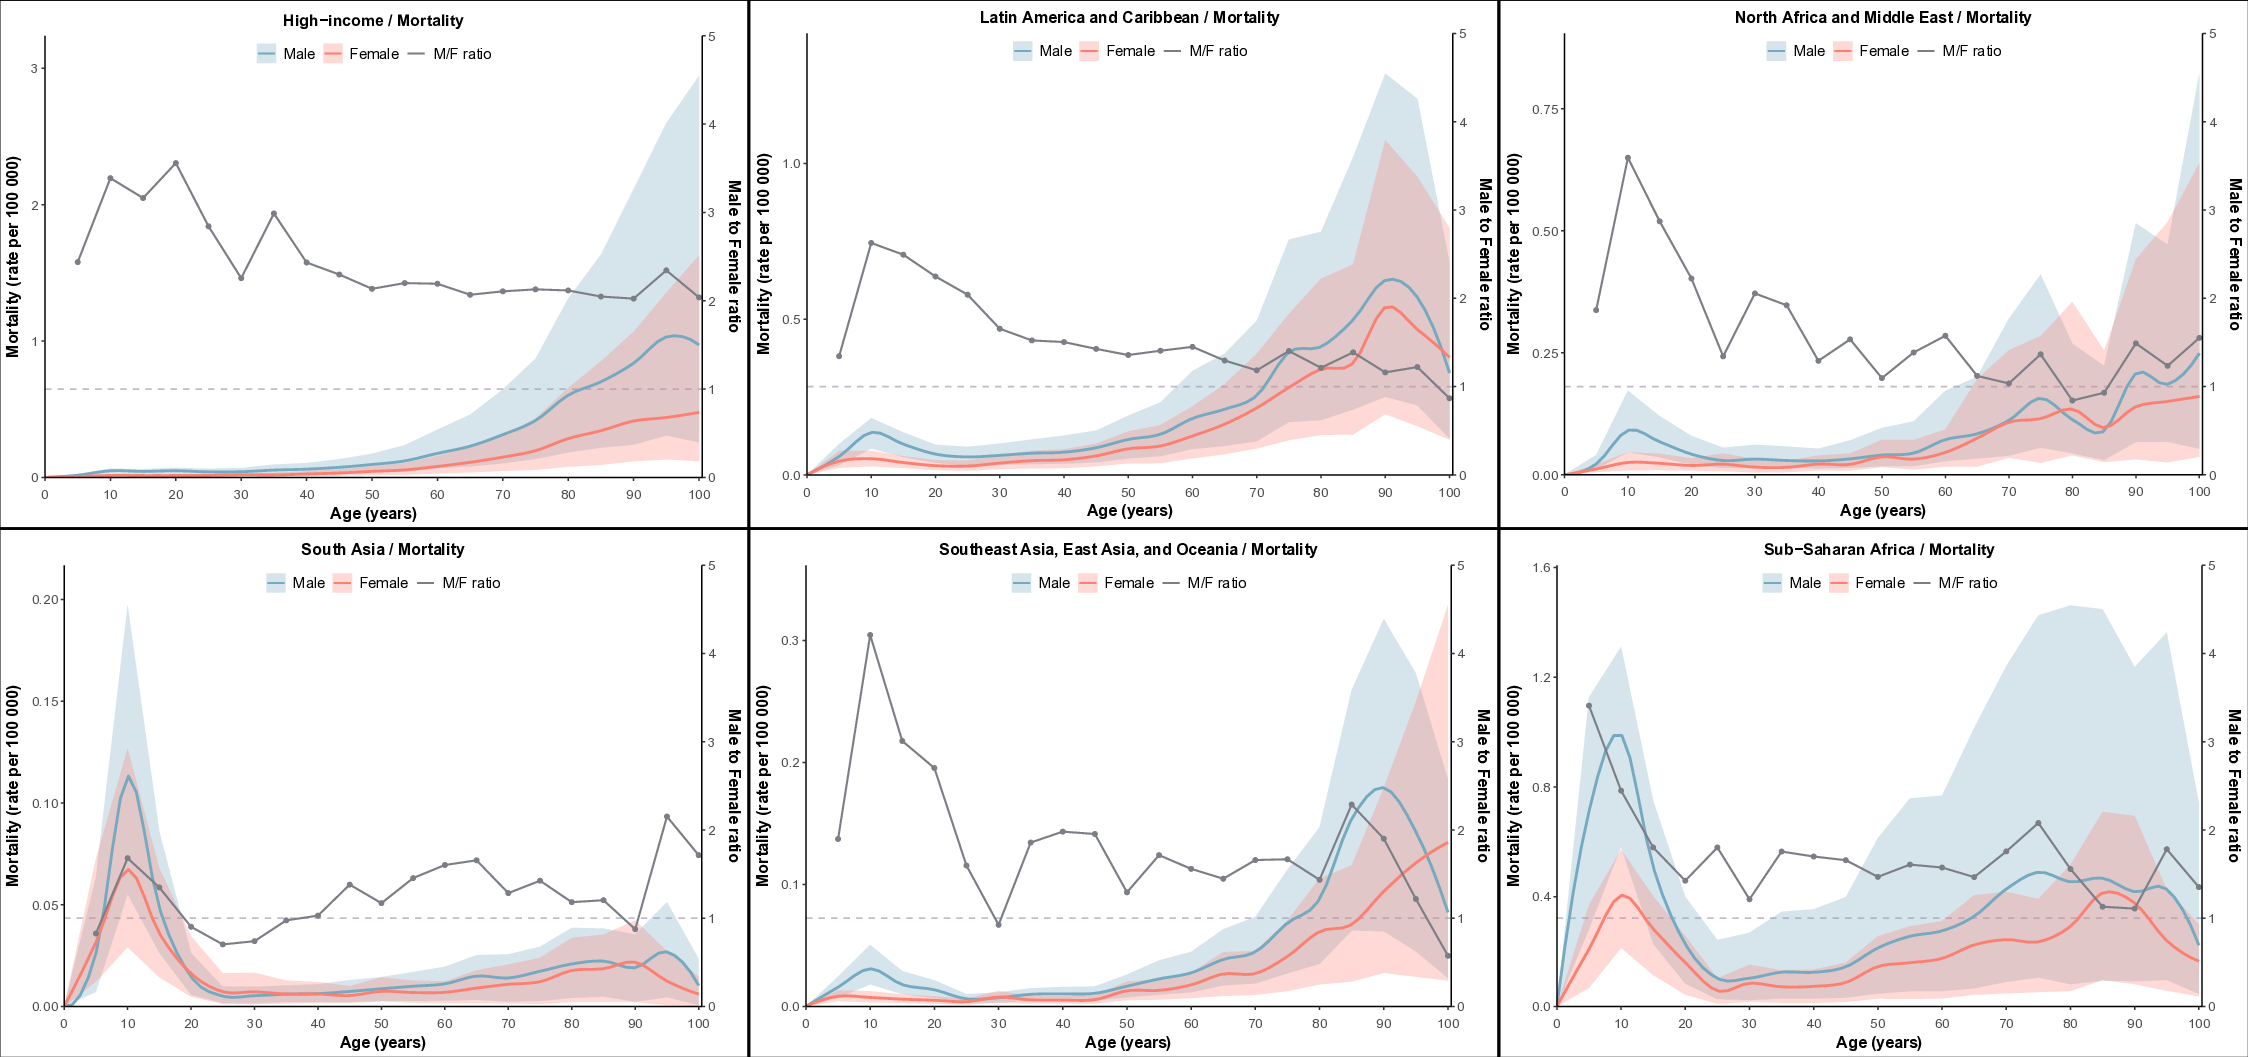


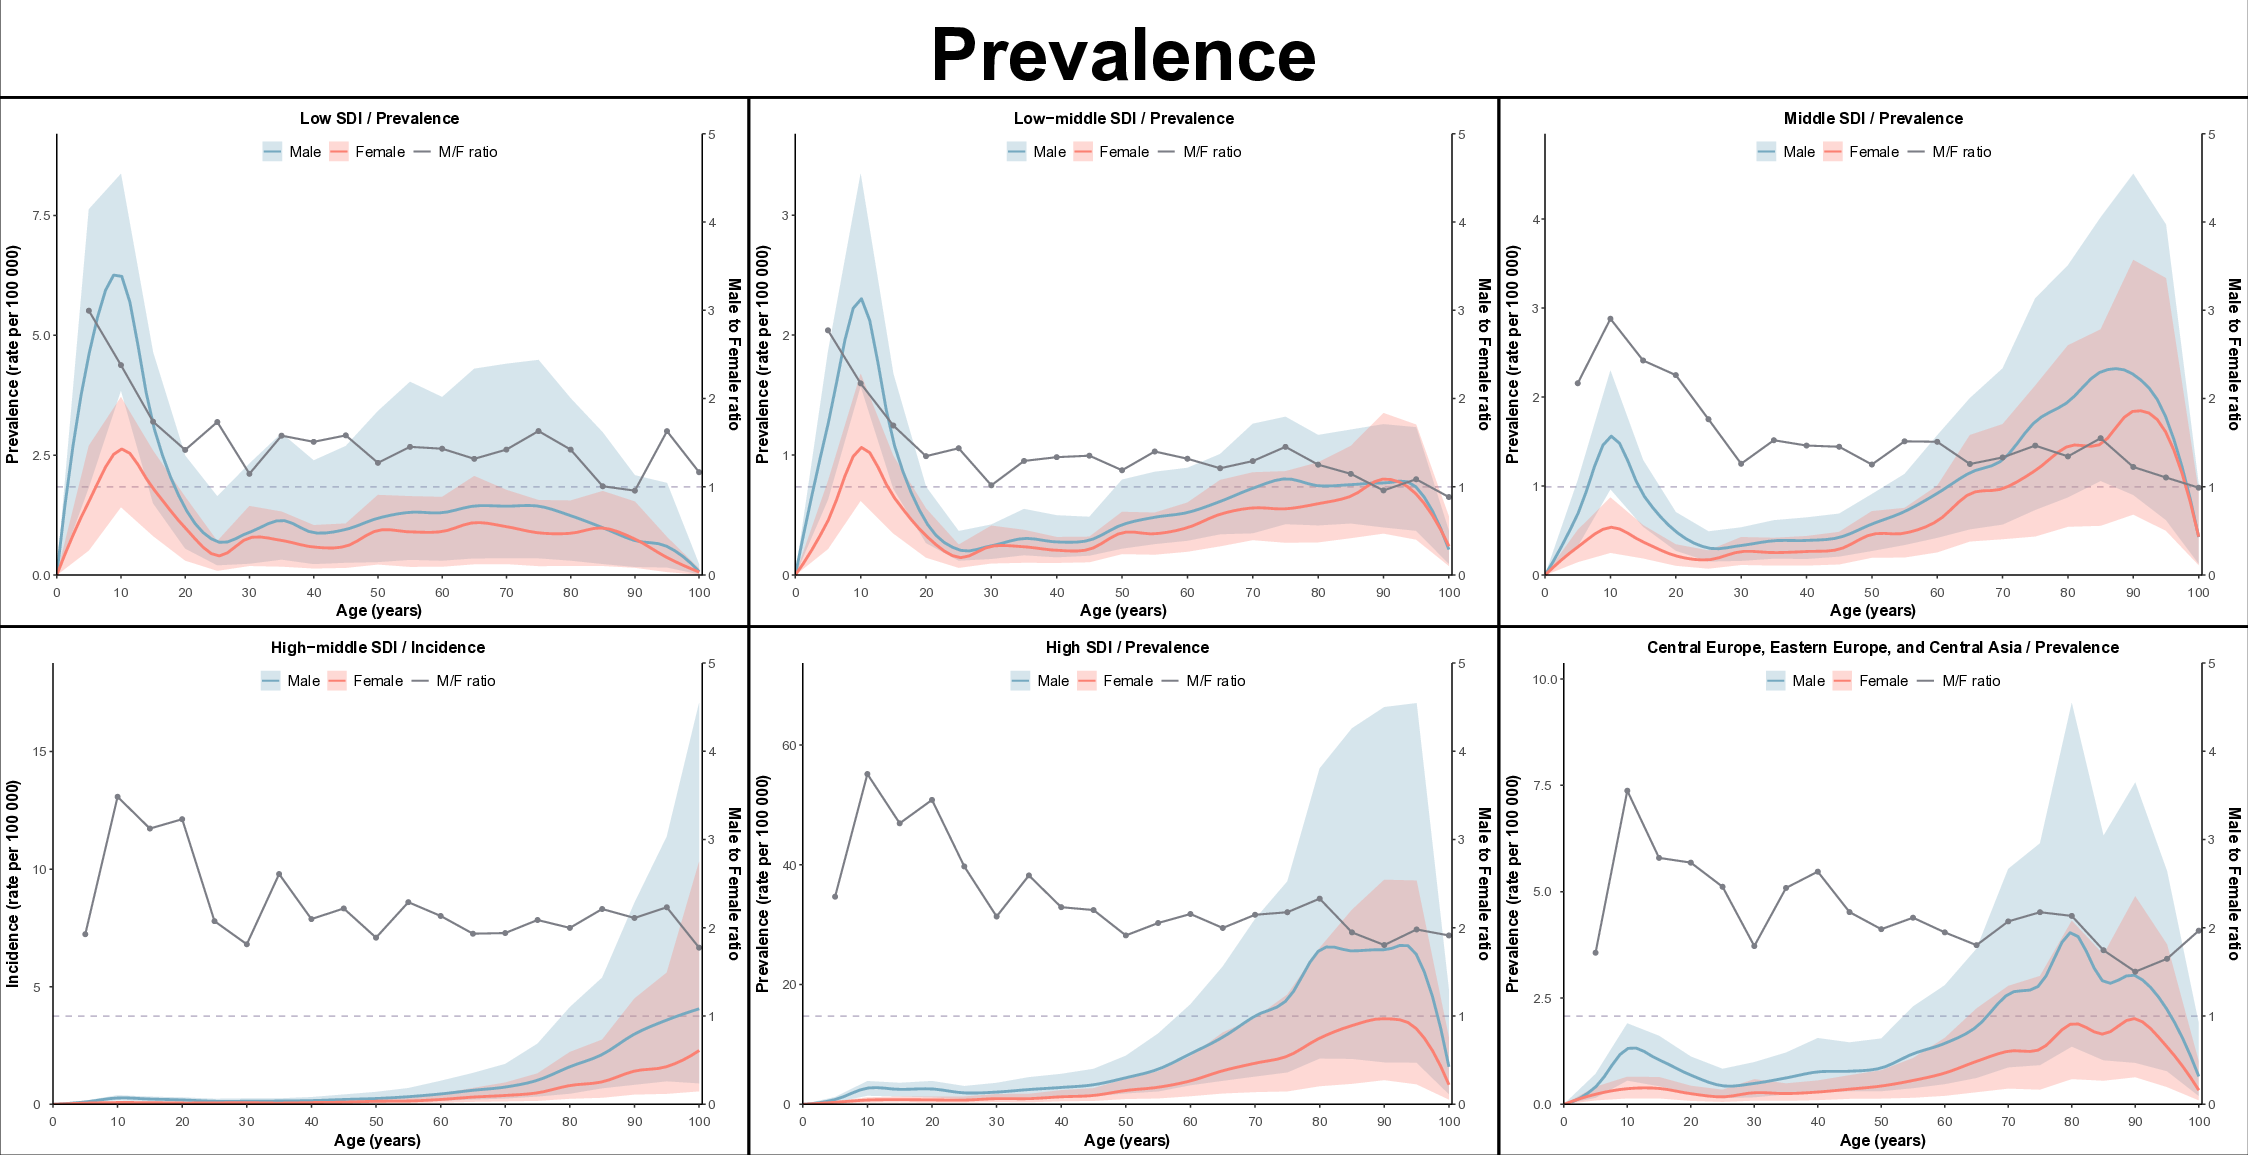


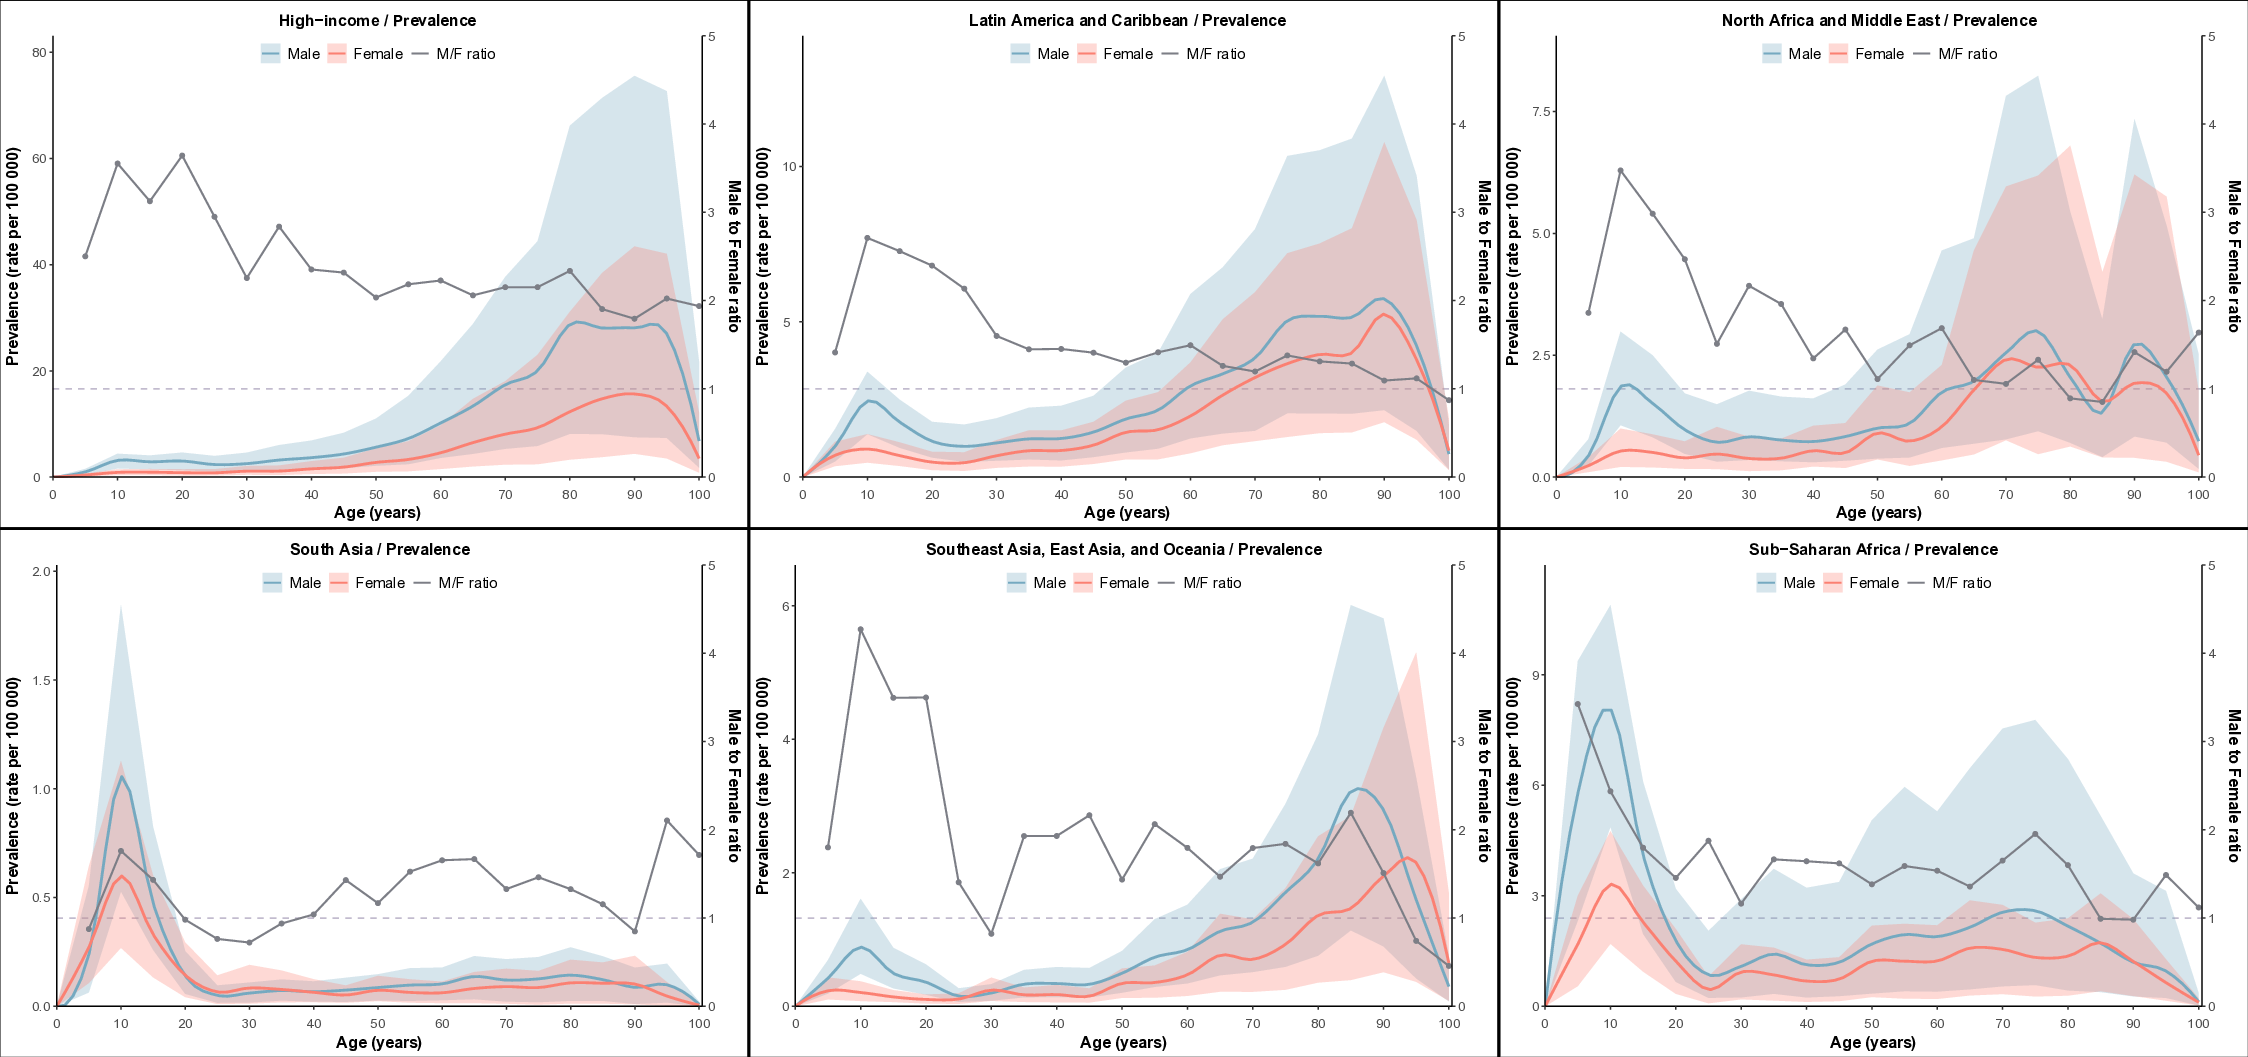


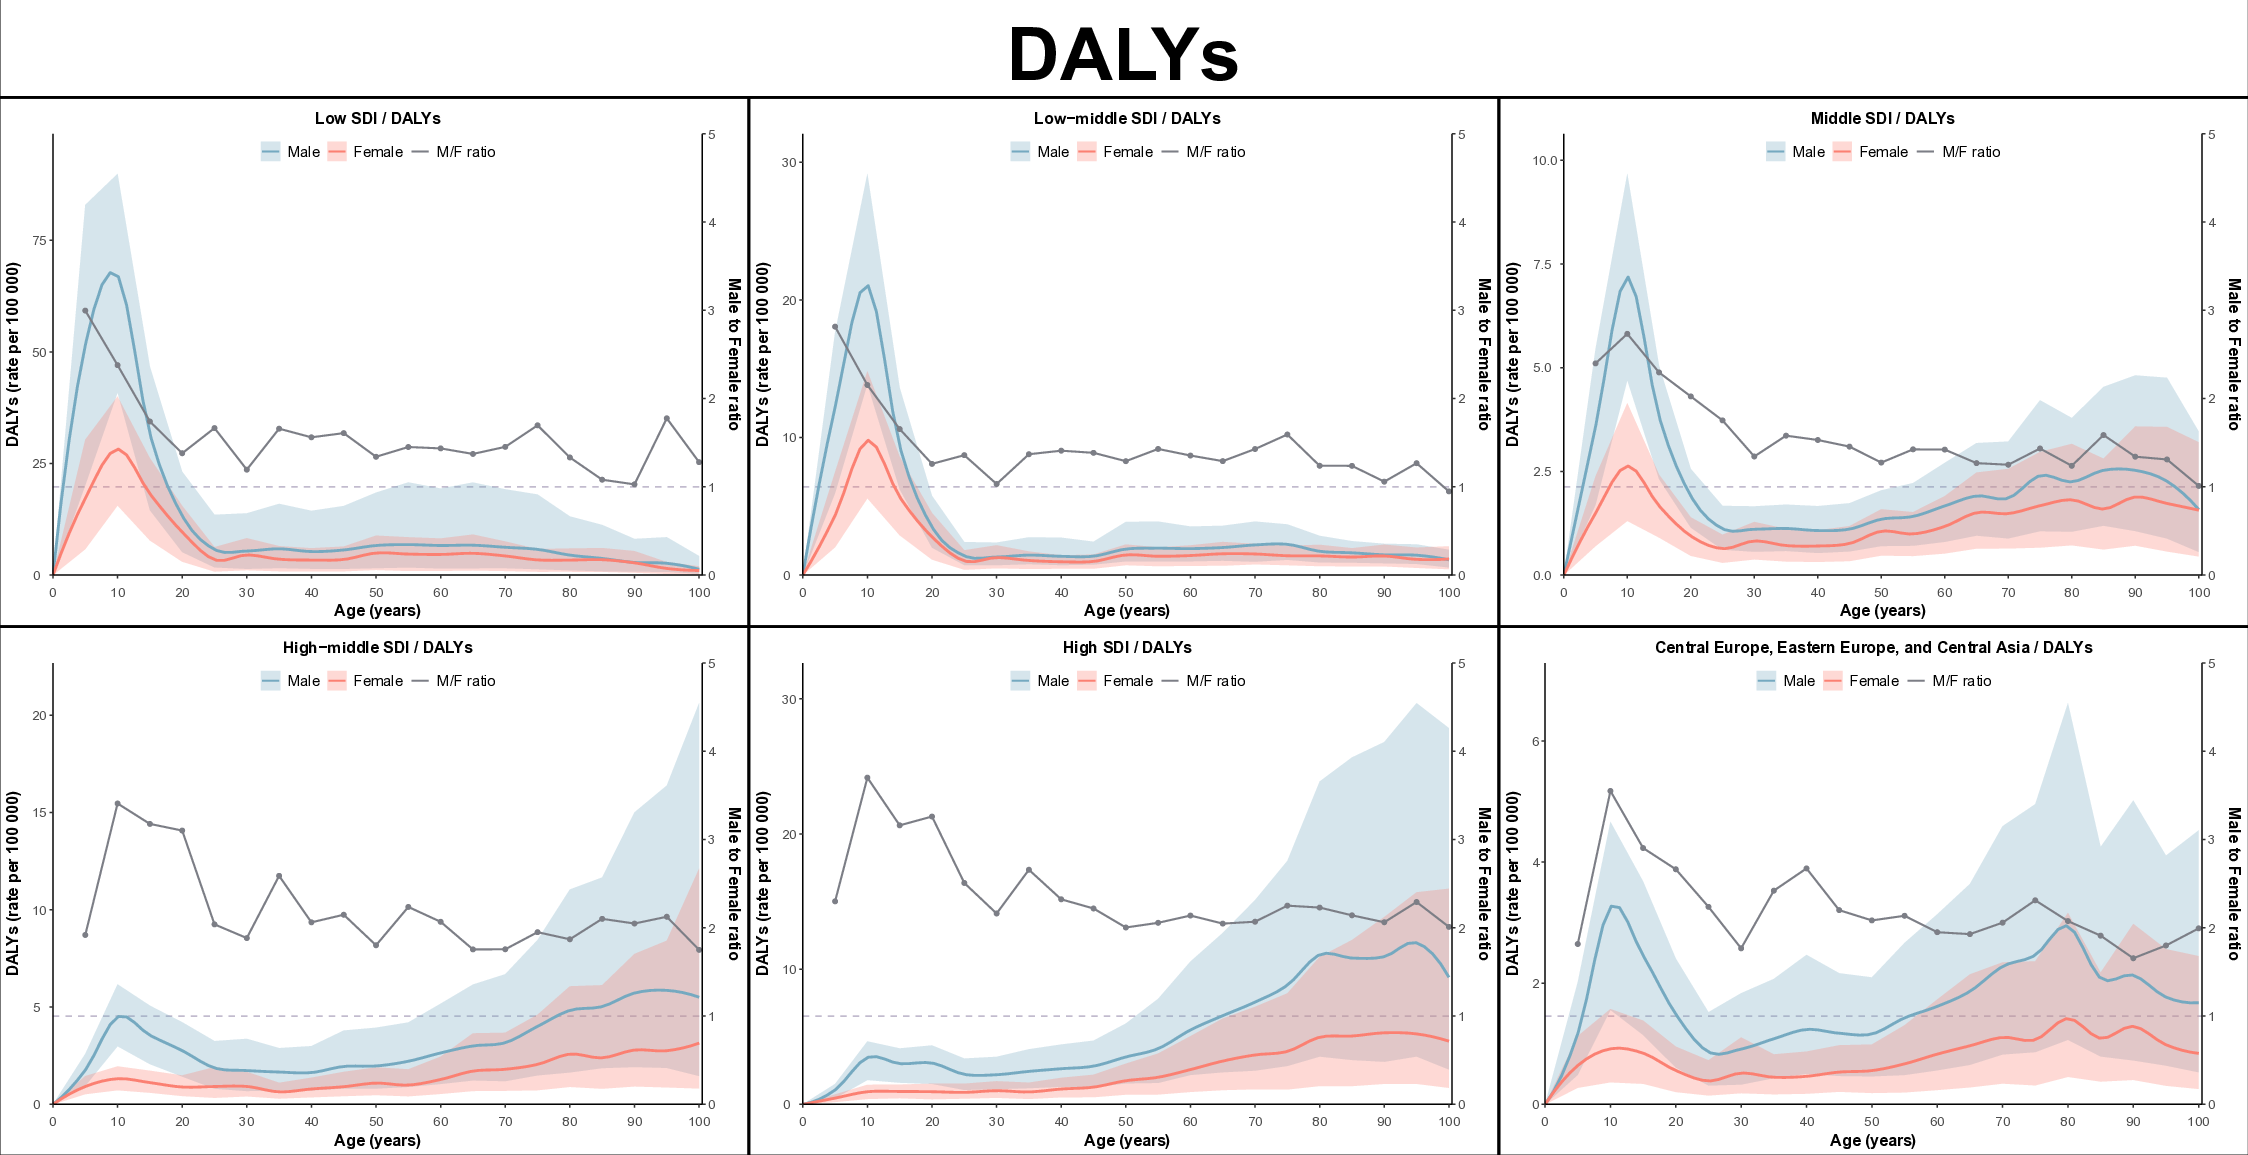


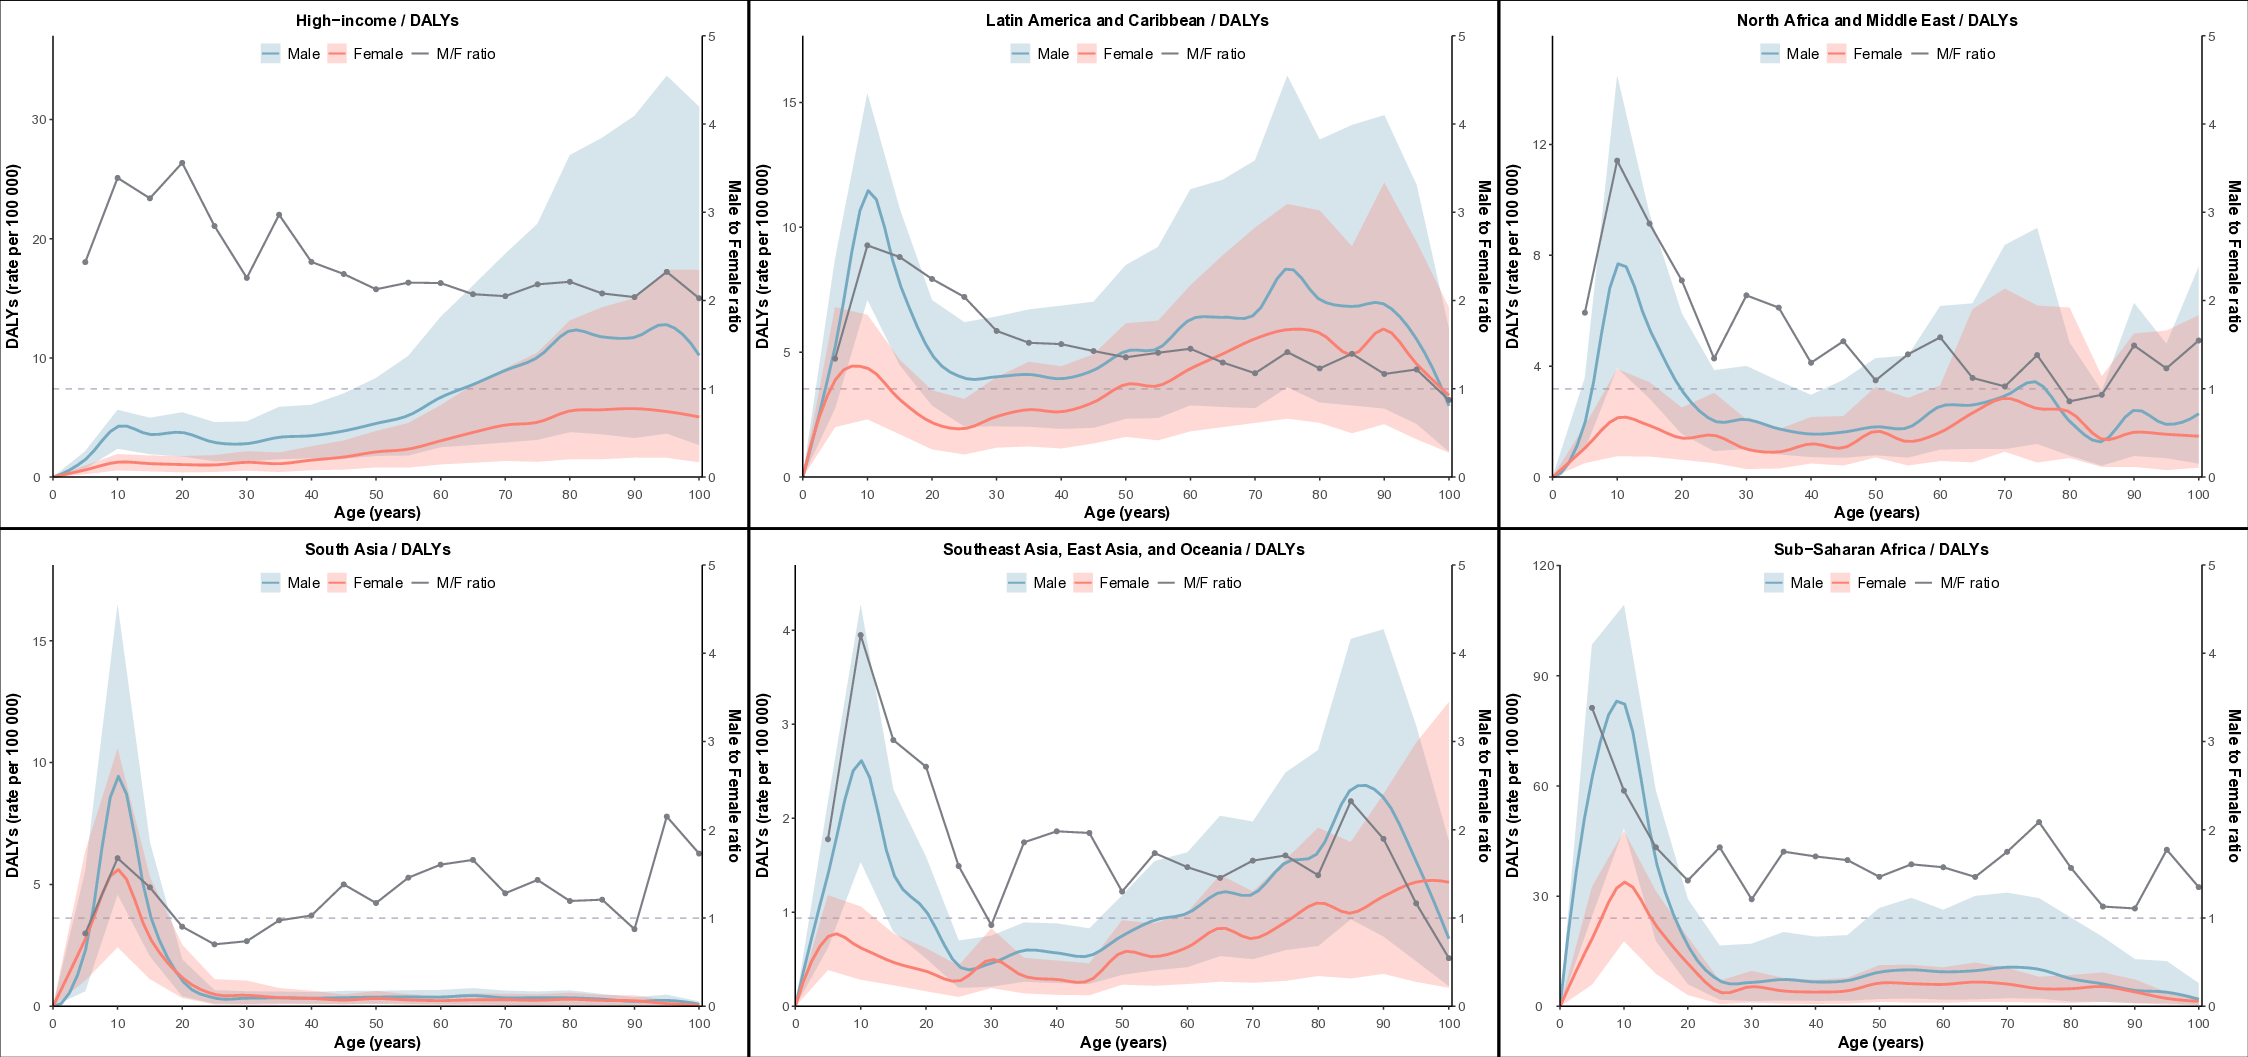


**Figure S2** Global percentage changes in the incidence (A), mortality (B), prevalence (C), and DALYs (D) of Burkitt lymphoma by age and sex, 1990-2021.

**
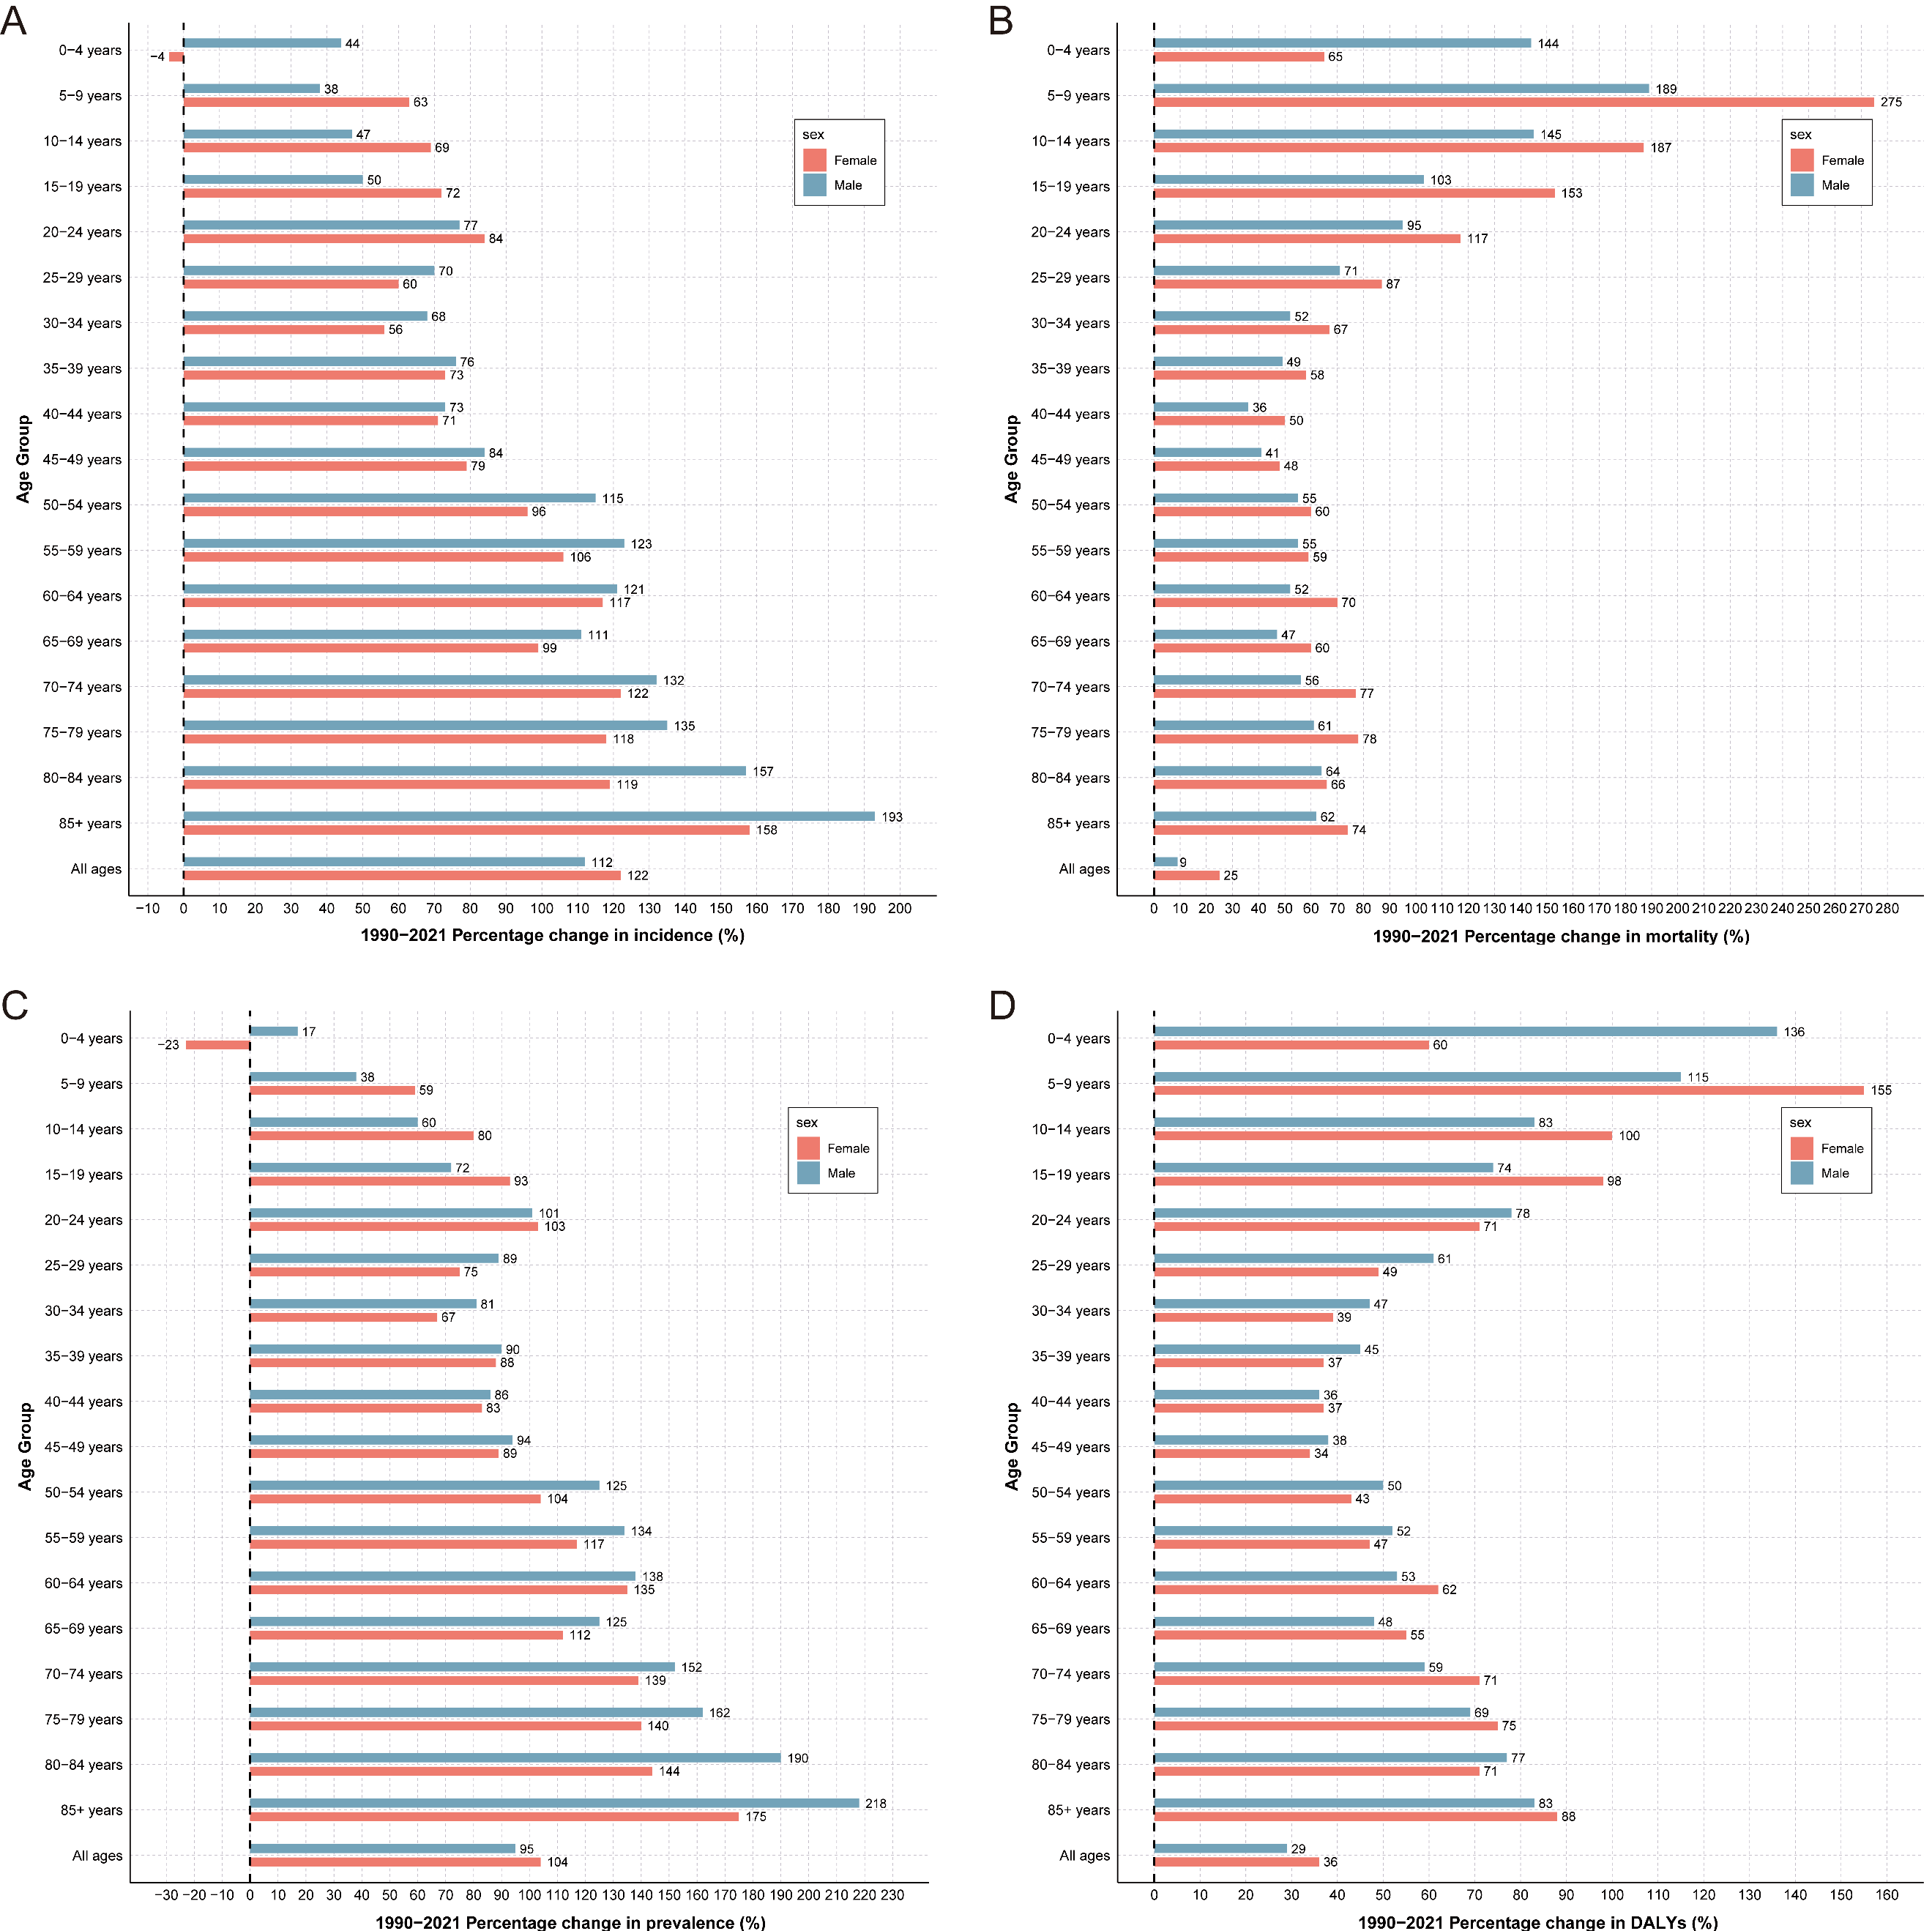
**

**Figure S3** Projections for global health burden rates of Burkitt lymphoma by sex, all ages, 2021-2040.


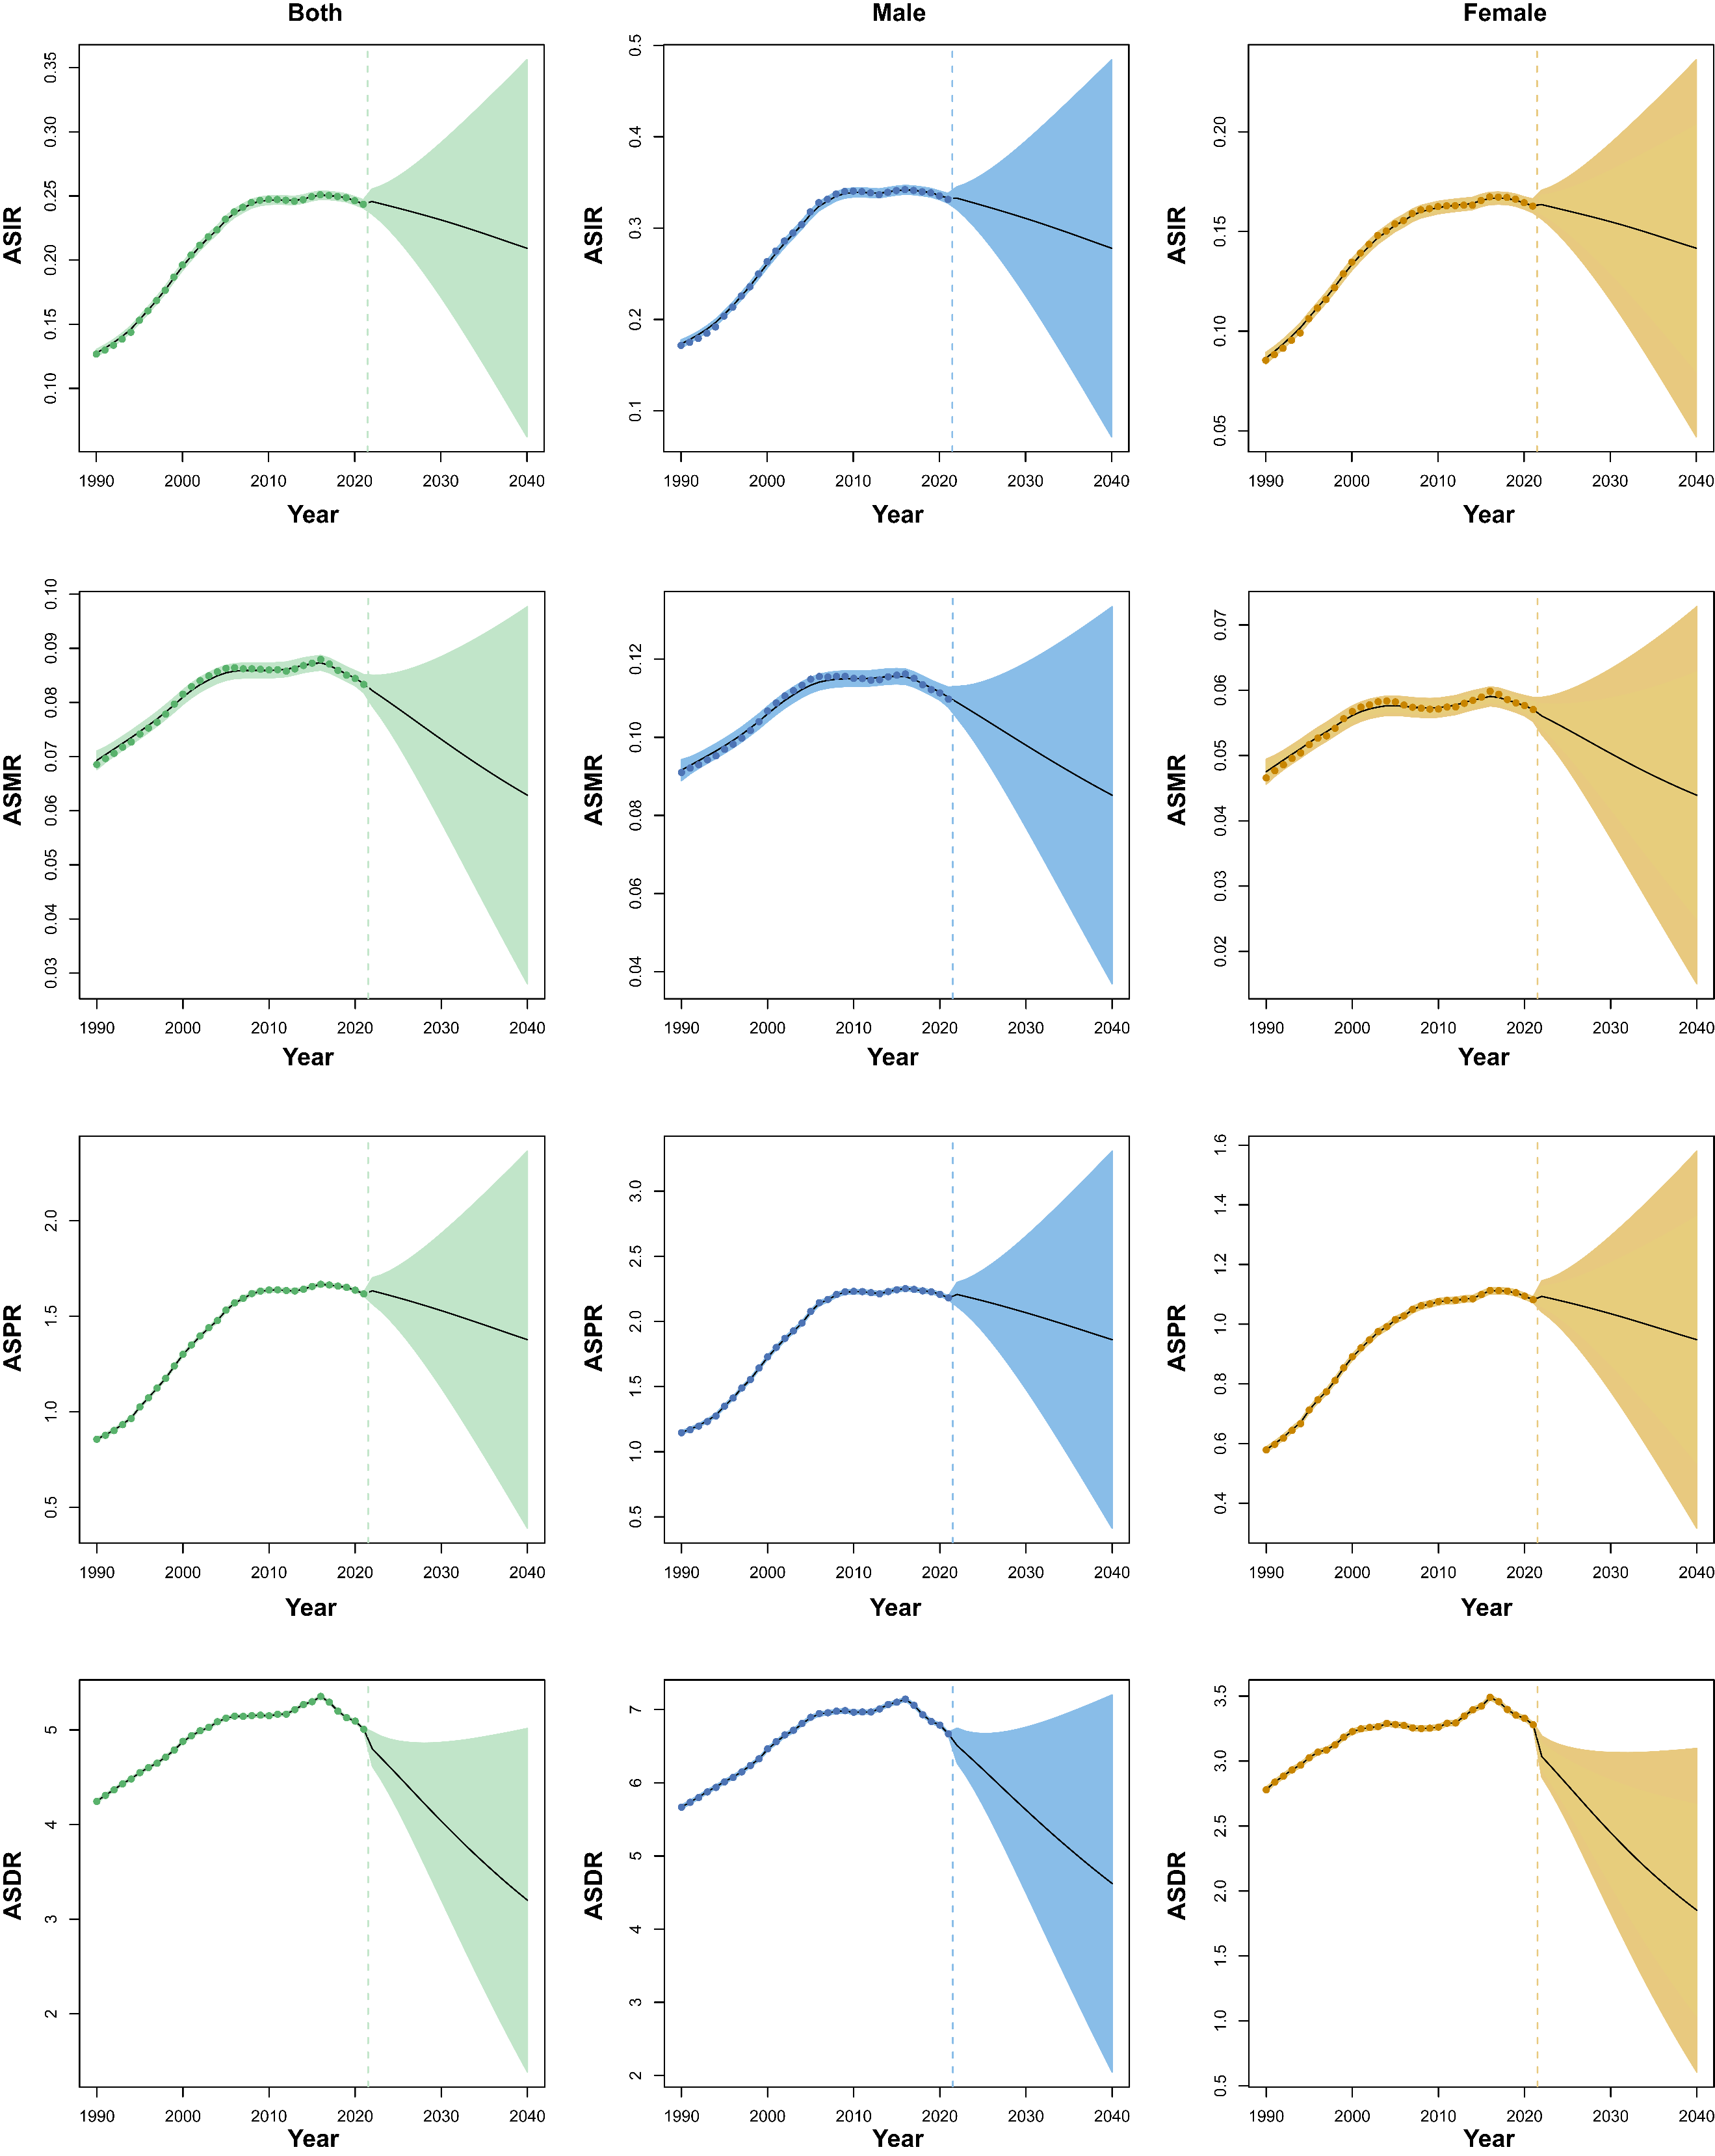


**Figure S4** Projections for health burden rates of Burkitt lymphoma among GBD super regions, all ages, both sexes, 2021-2040.


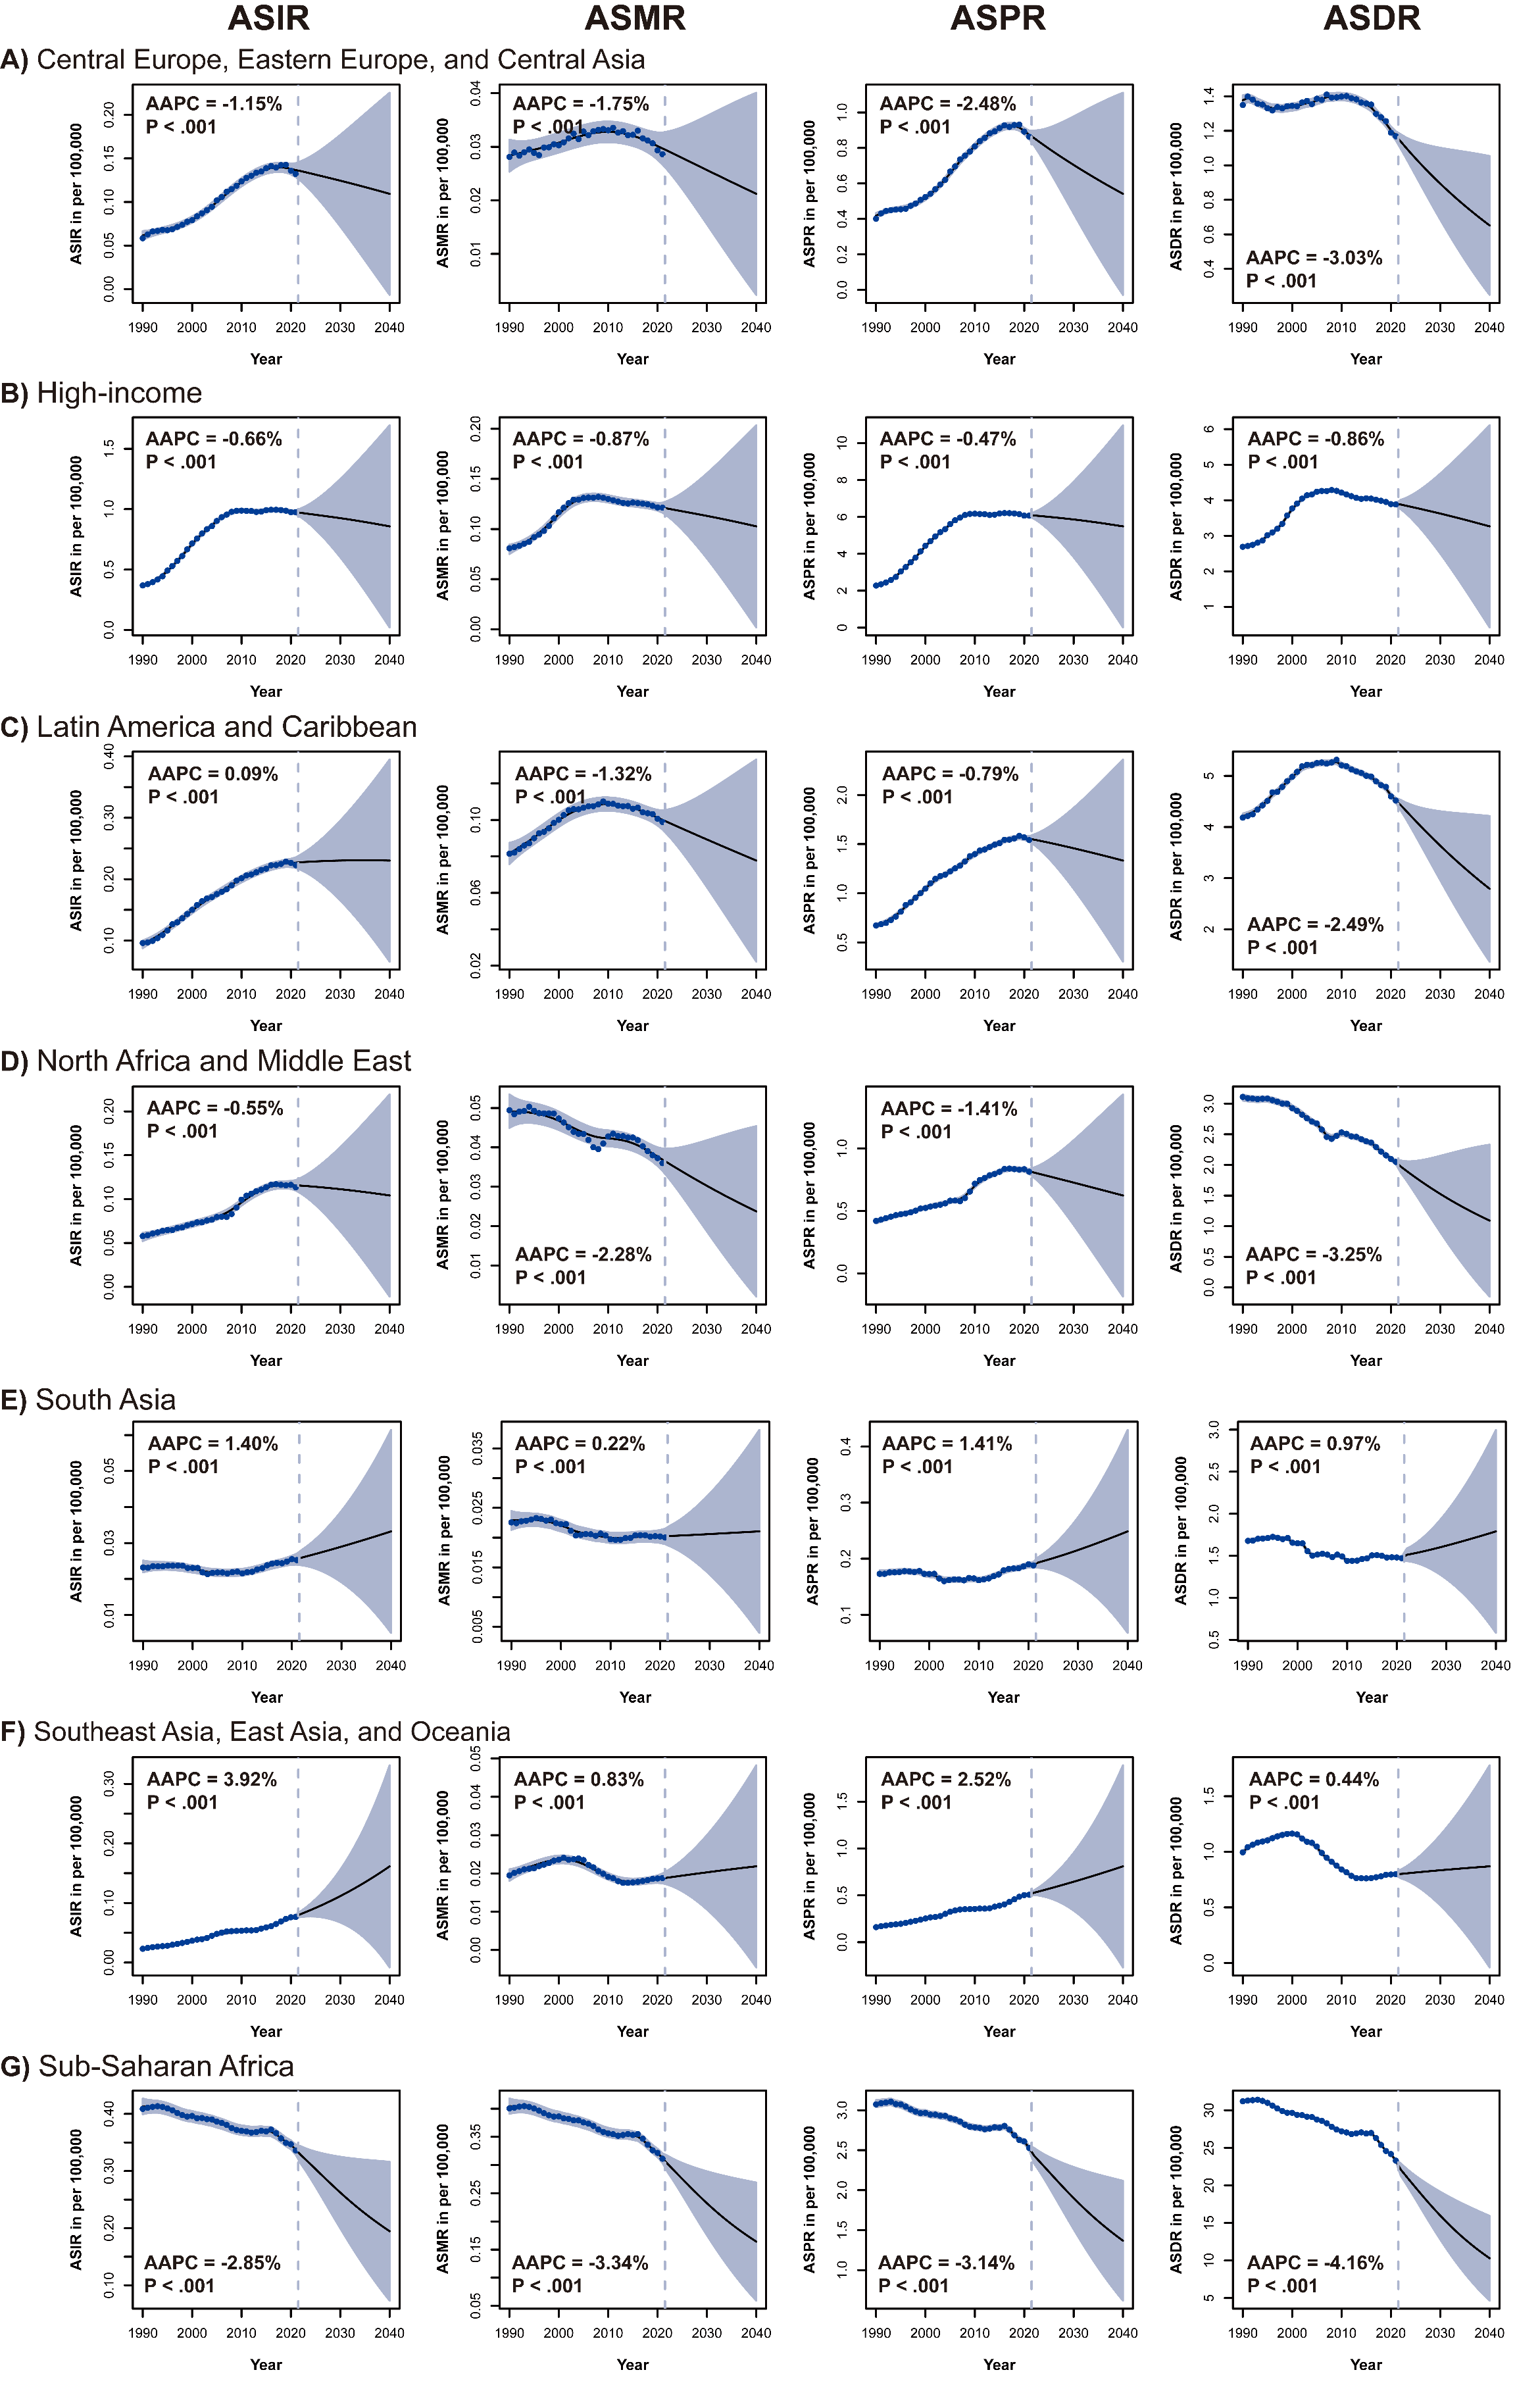


**Figure S5** Projections for global health burden rates of Burkitt lymphoma by age, both sexes, 2021-2040.


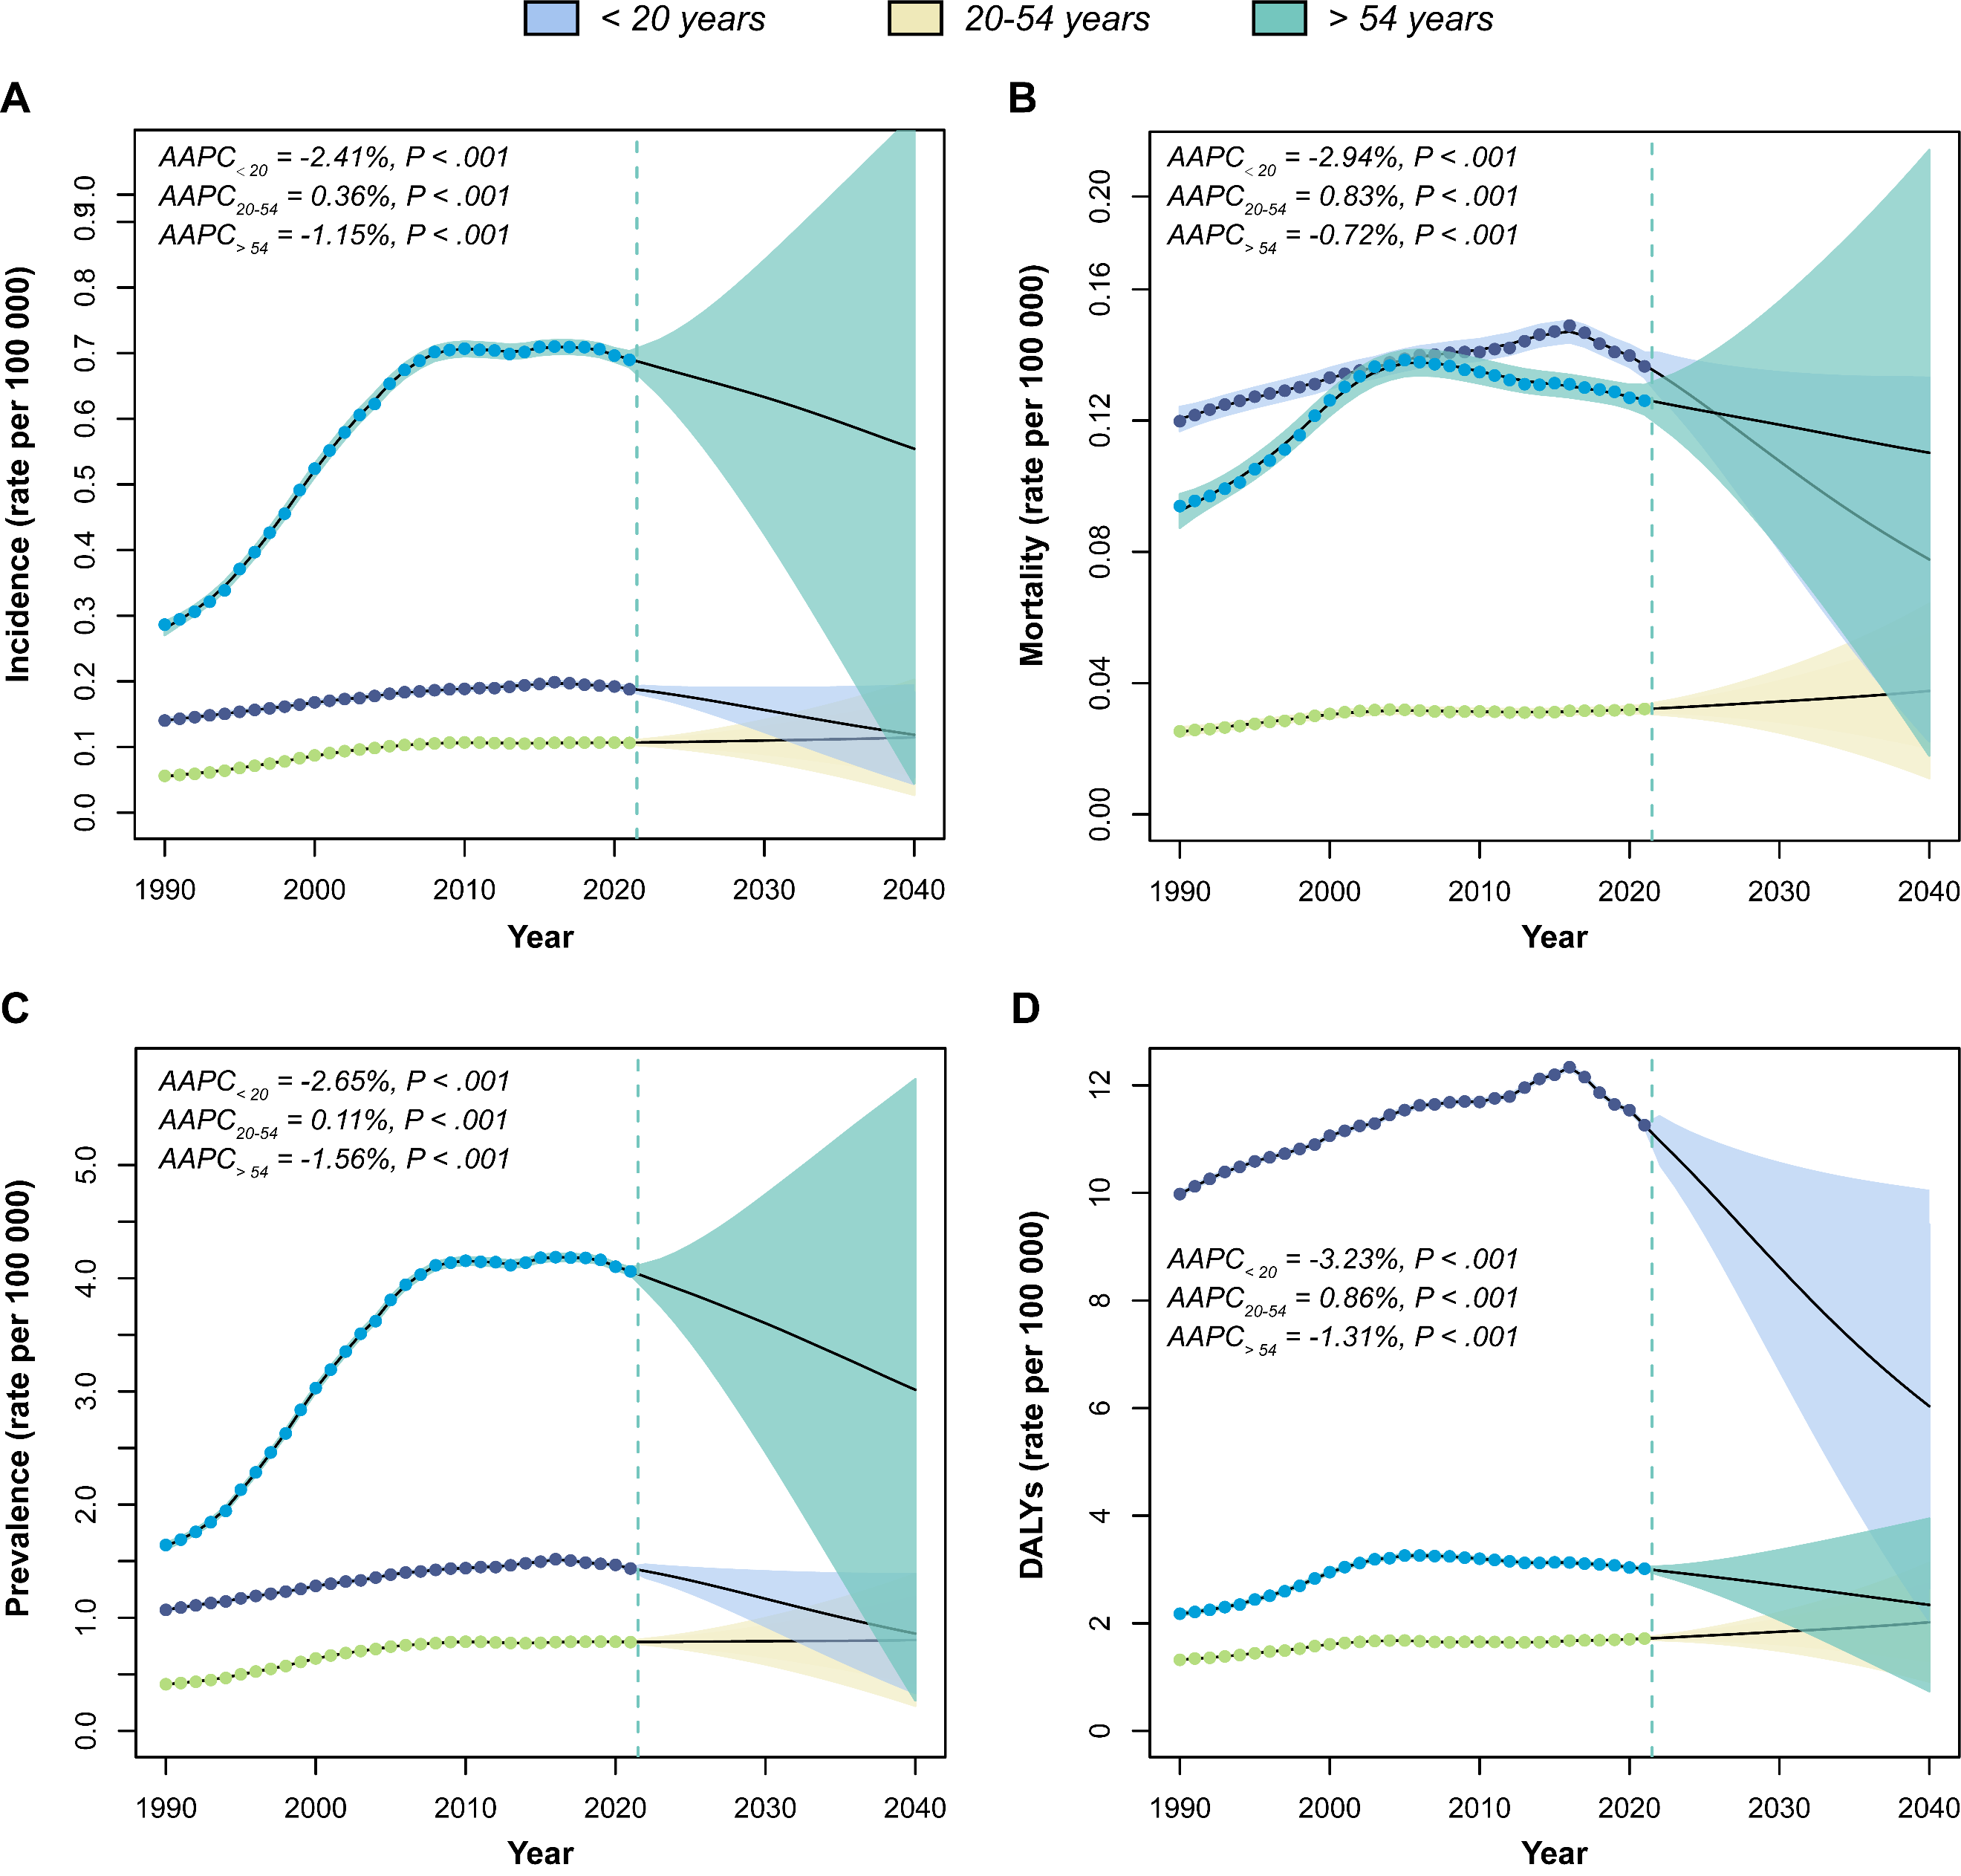


**Figure S6A** Potential risk factors for global incidence and mortality rates of Burkitt lymphoma by sex in 2021, per 100,000 person-years, < 20 years old.


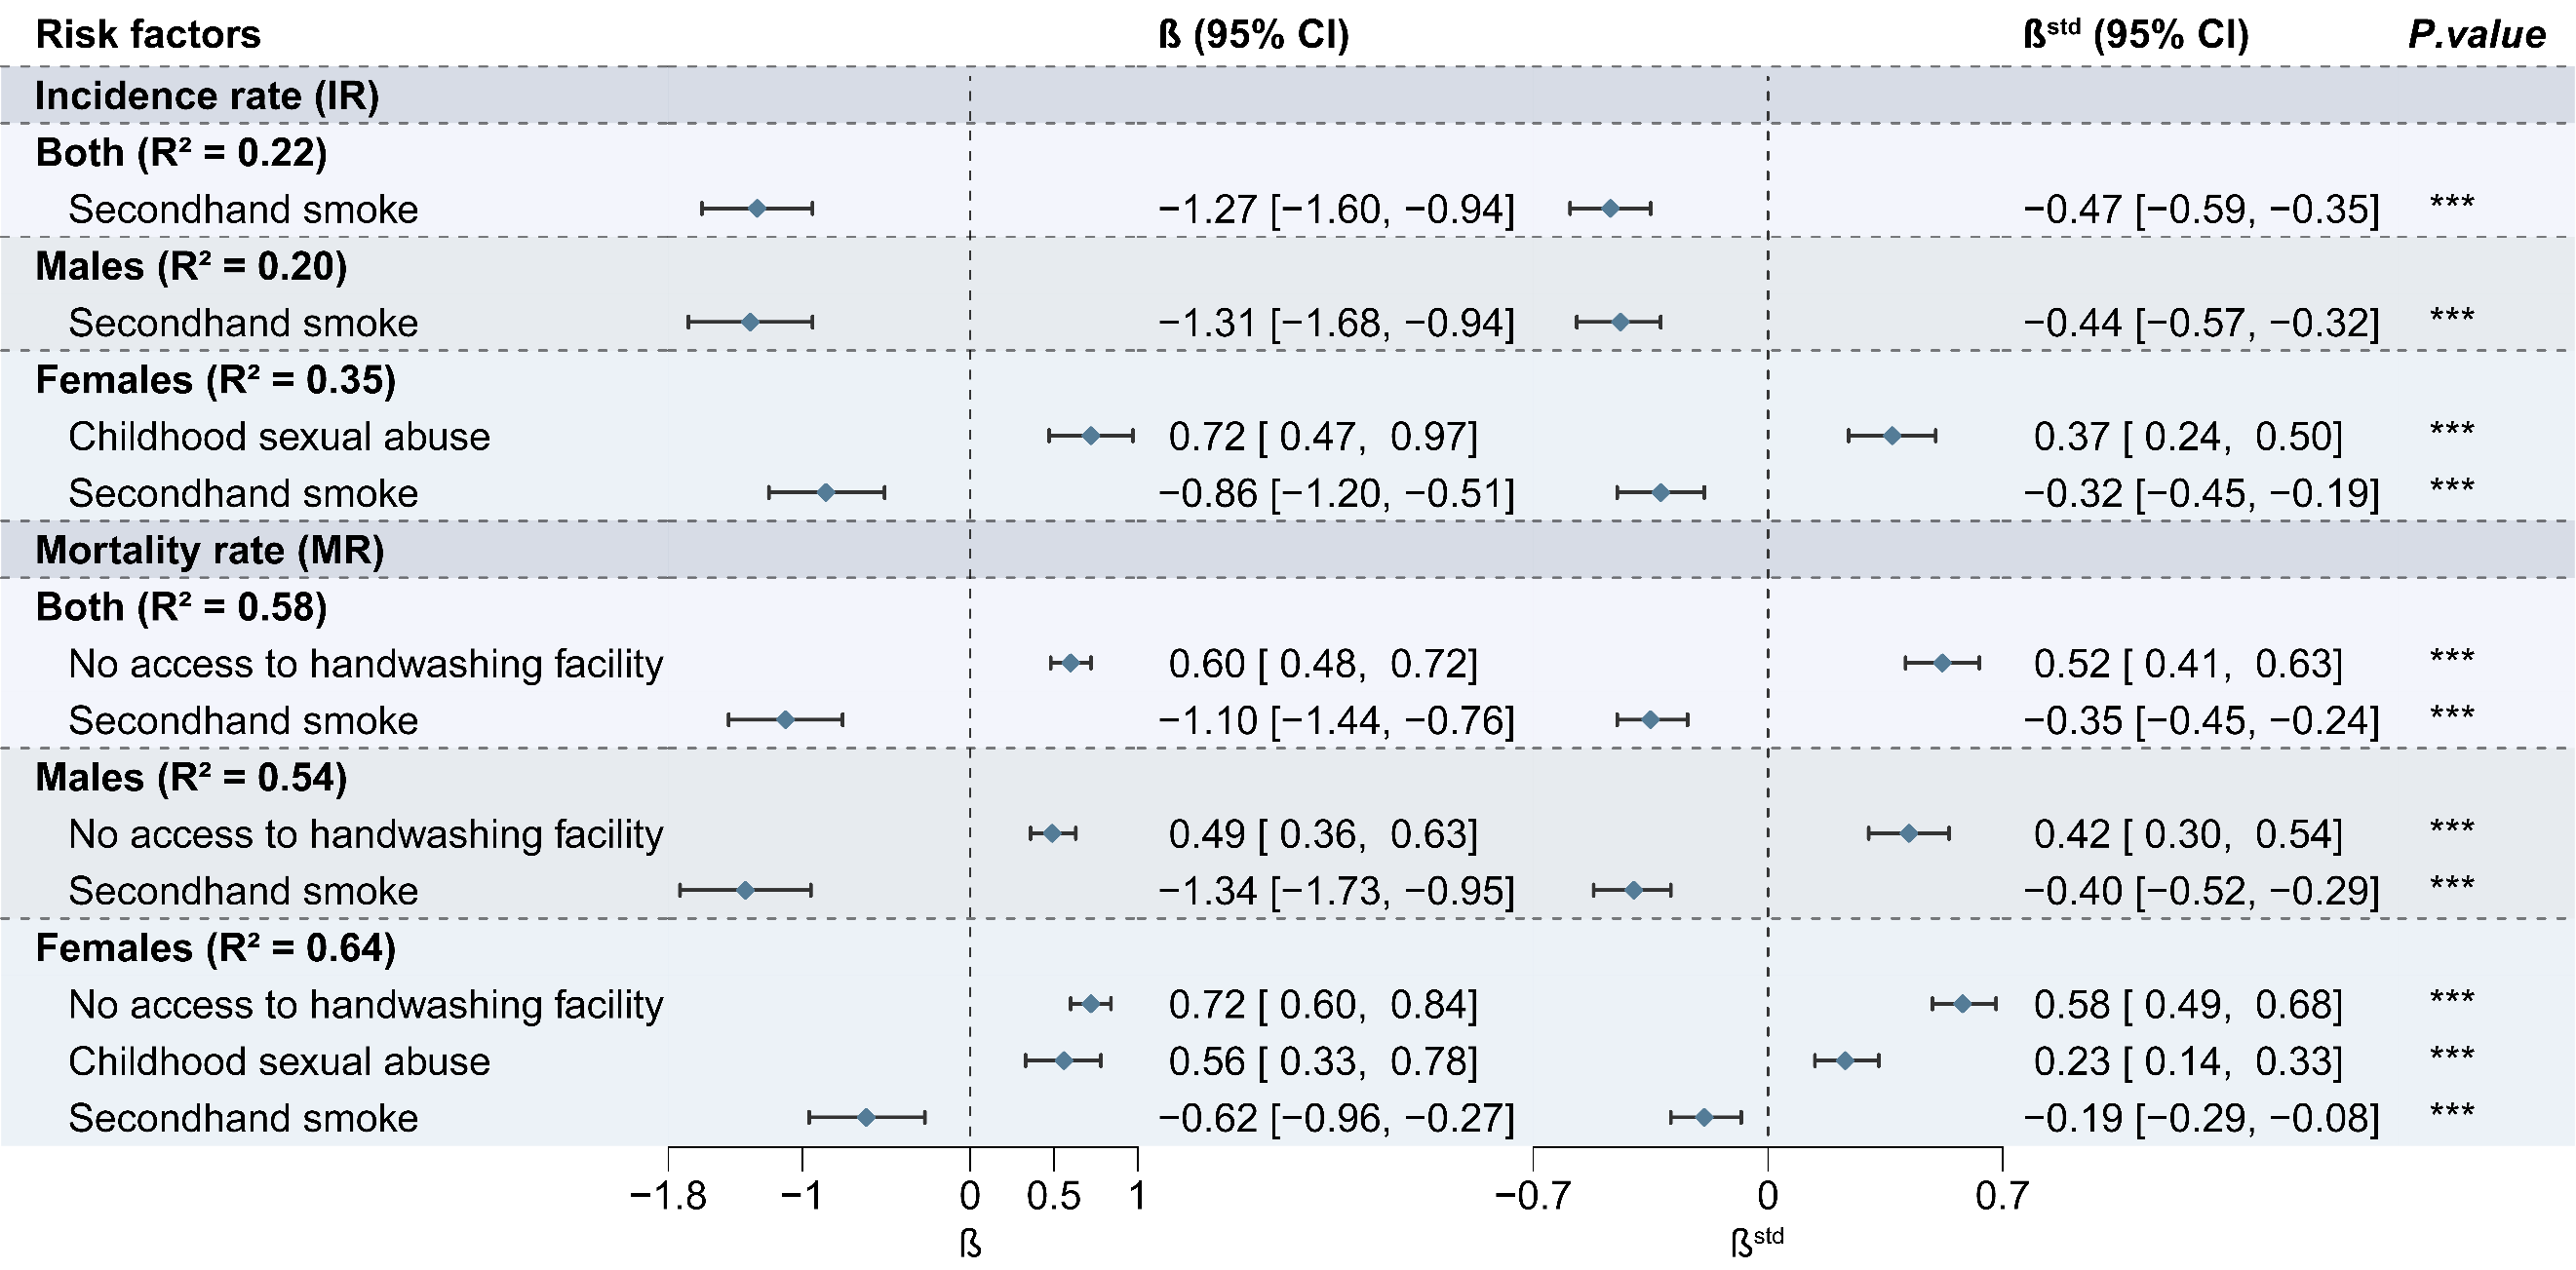


**Note:** *: *P <* .05, **: *P <* .01, ***: *P <* .001.

**Abbreviations:** β: regression coefficient; βstd: standardized regression coefficient.

**Figure S6B** Potential risk factors for global incidence and mortality rates of Burkitt lymphoma by sex in 2021, per 100,000 person-years, 20-54 years old.


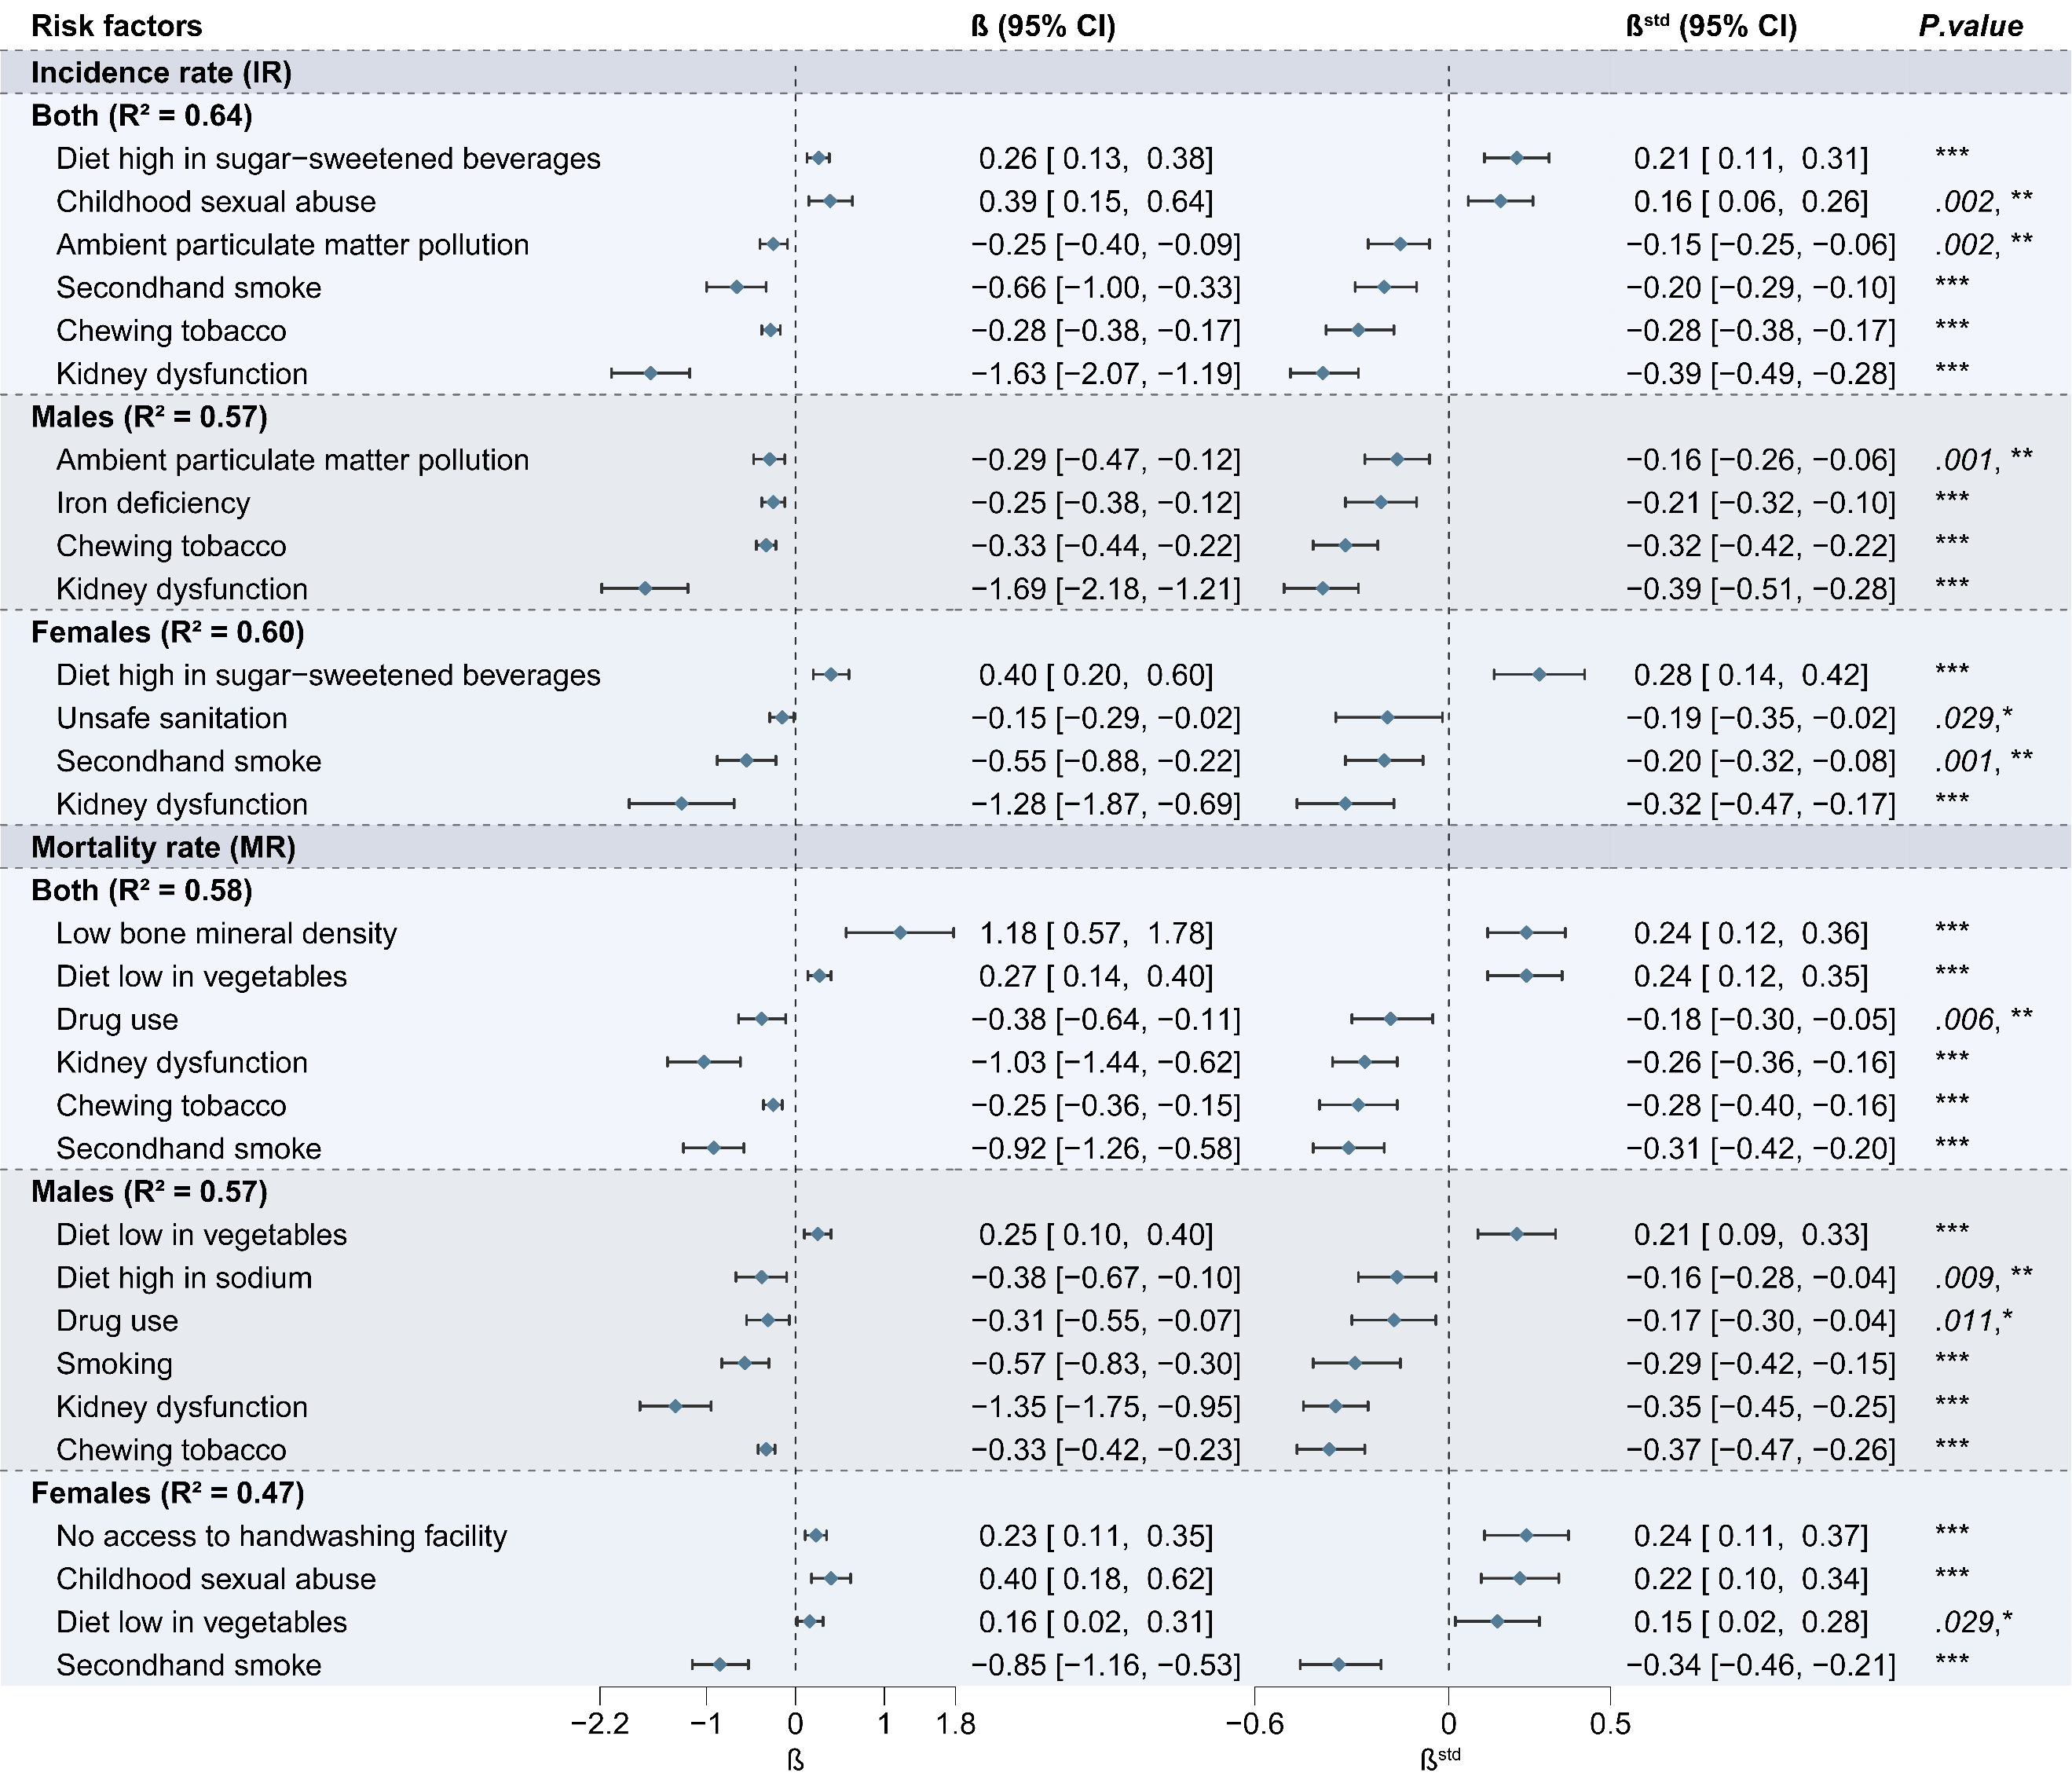


**Note:** *: *P <* .05, **: *P <* .01, ***: *P <* .001.

**Abbreviations:** β: regression coefficient; βstd: standardized regression coefficient.

**Figure S6C** Potential risk factors for global incidence and mortality rates of Burkitt lymphoma by sex in 2021, per 100,000 person-years, > 54 years old.


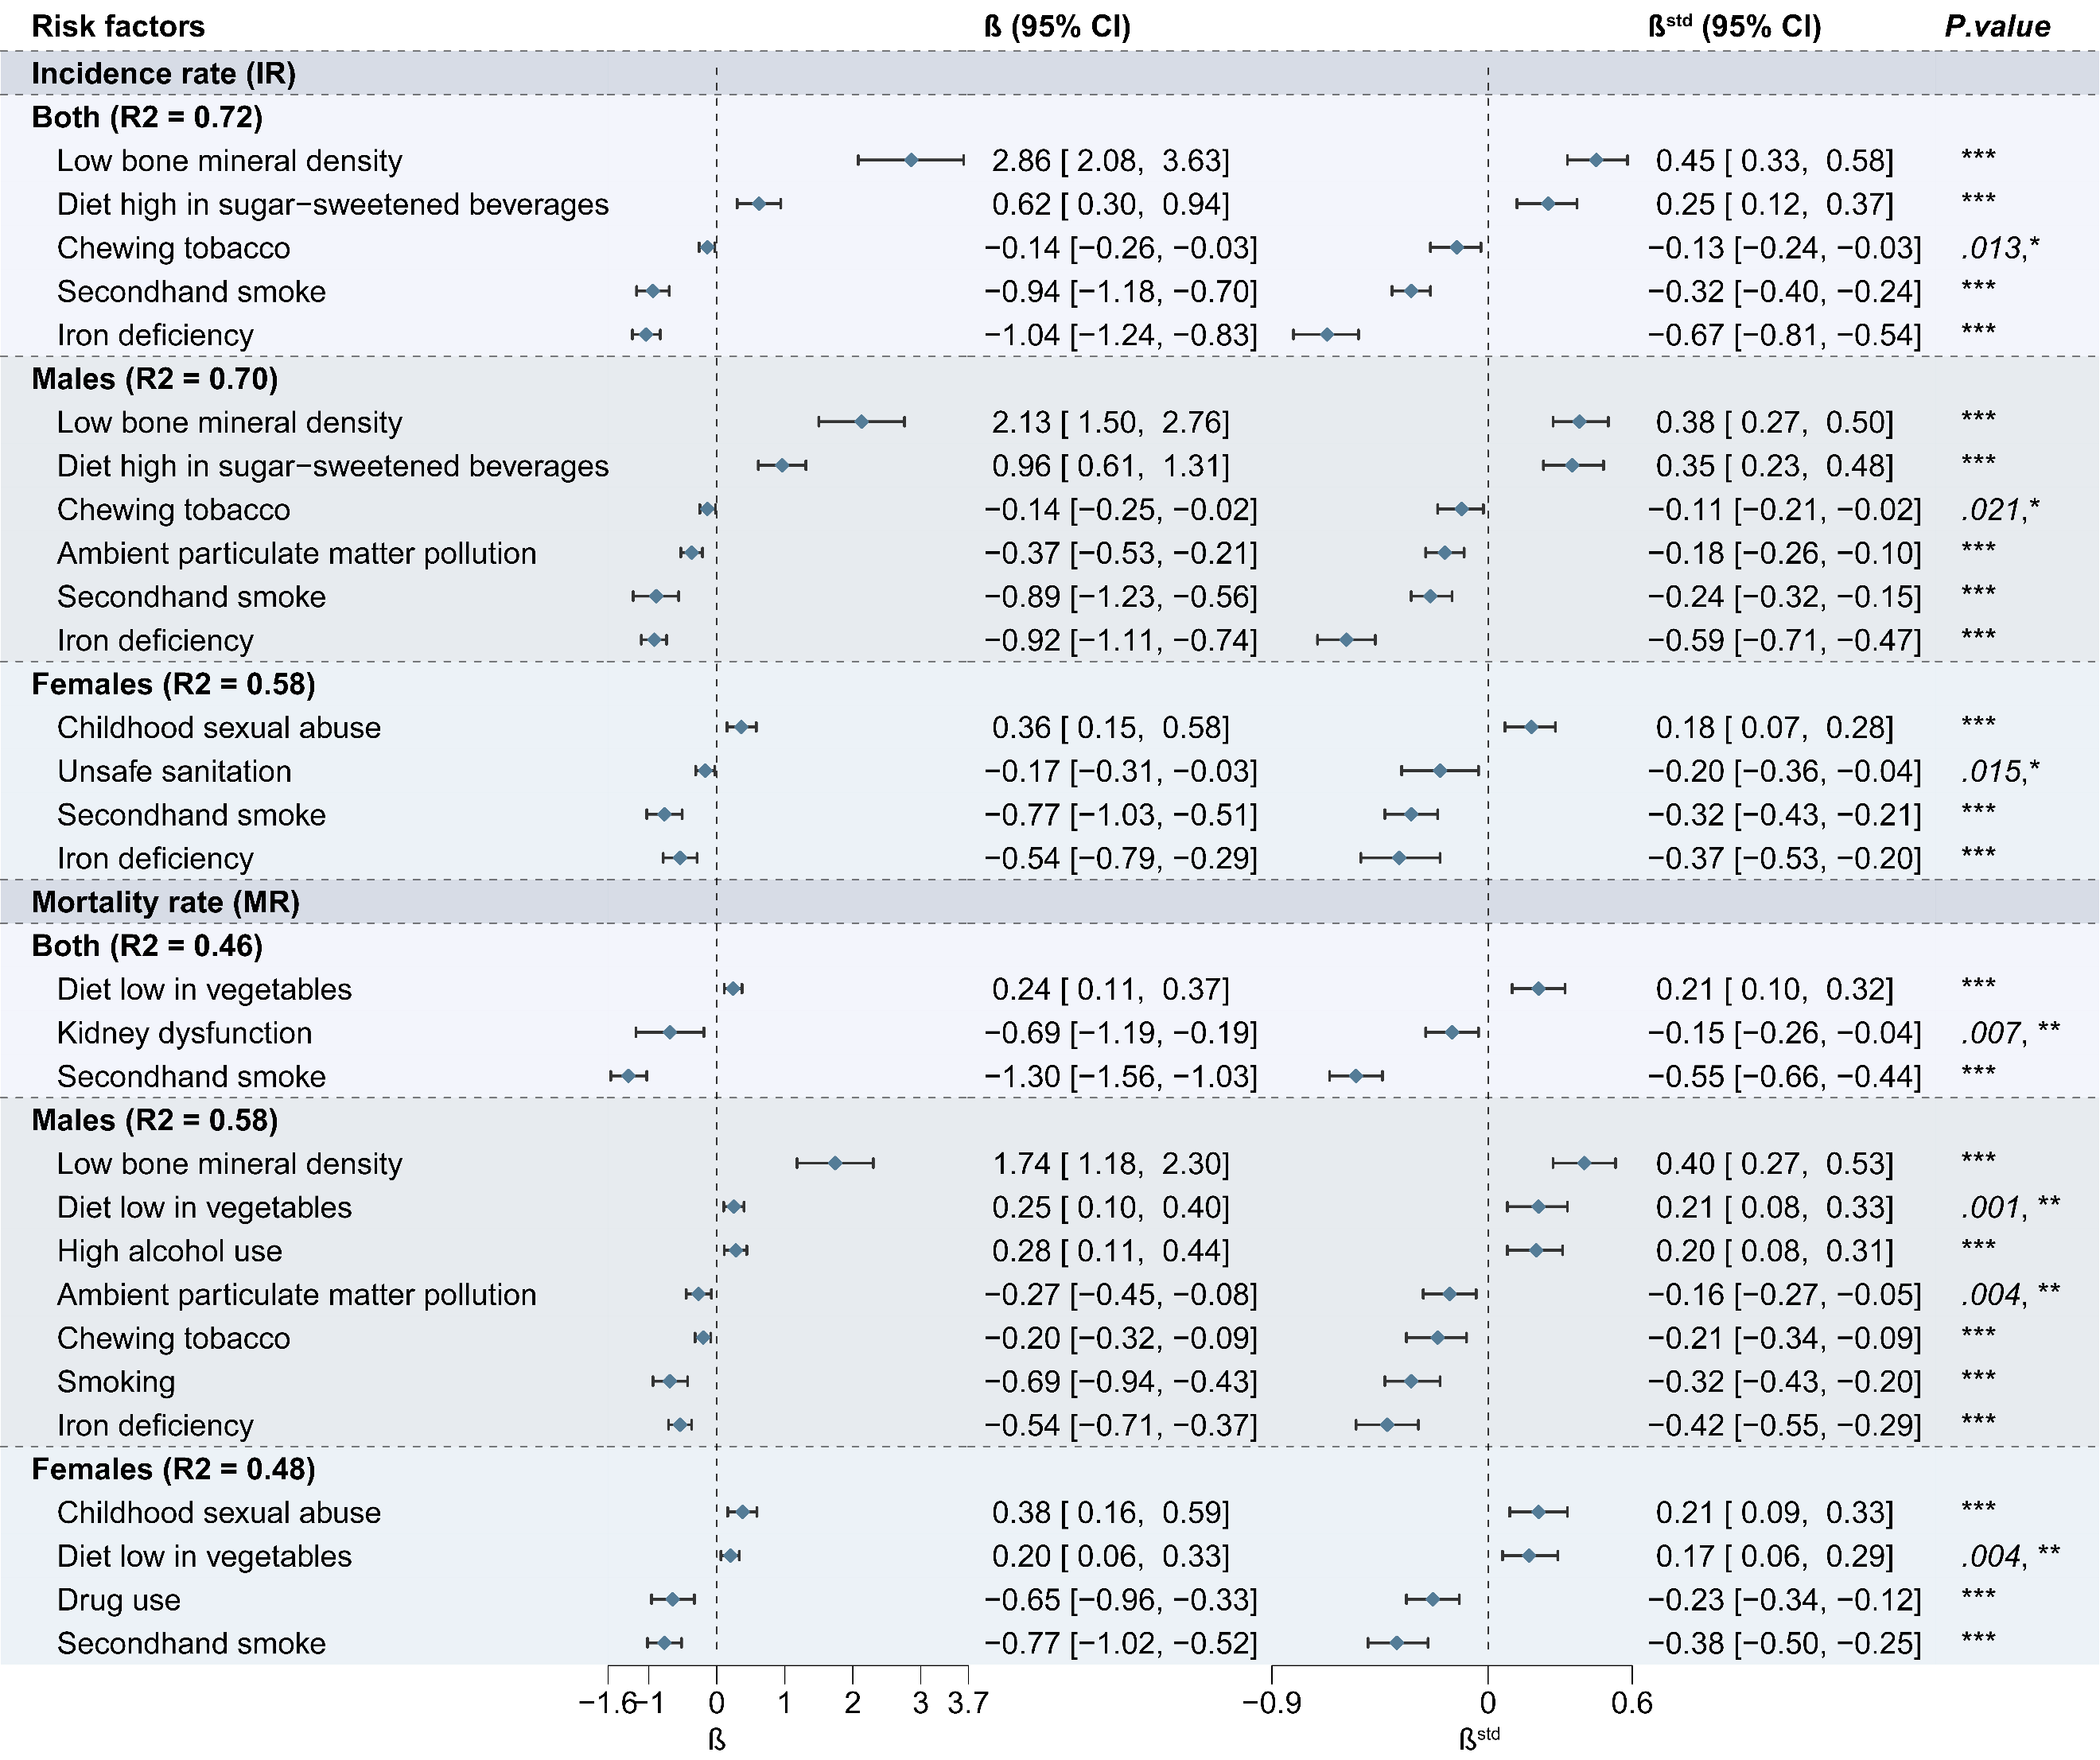


**Note:** *: *P <* .05, **: *P <* .01, ***: *P <* .001.

**Abbreviations:** β: regression coefficient; βstd: standardized regression coefficient.

**Figure S7A** The correlation between potential risk factors and global incidence and mortality of Burkitt lymphoma by sex in 2021, all ages.


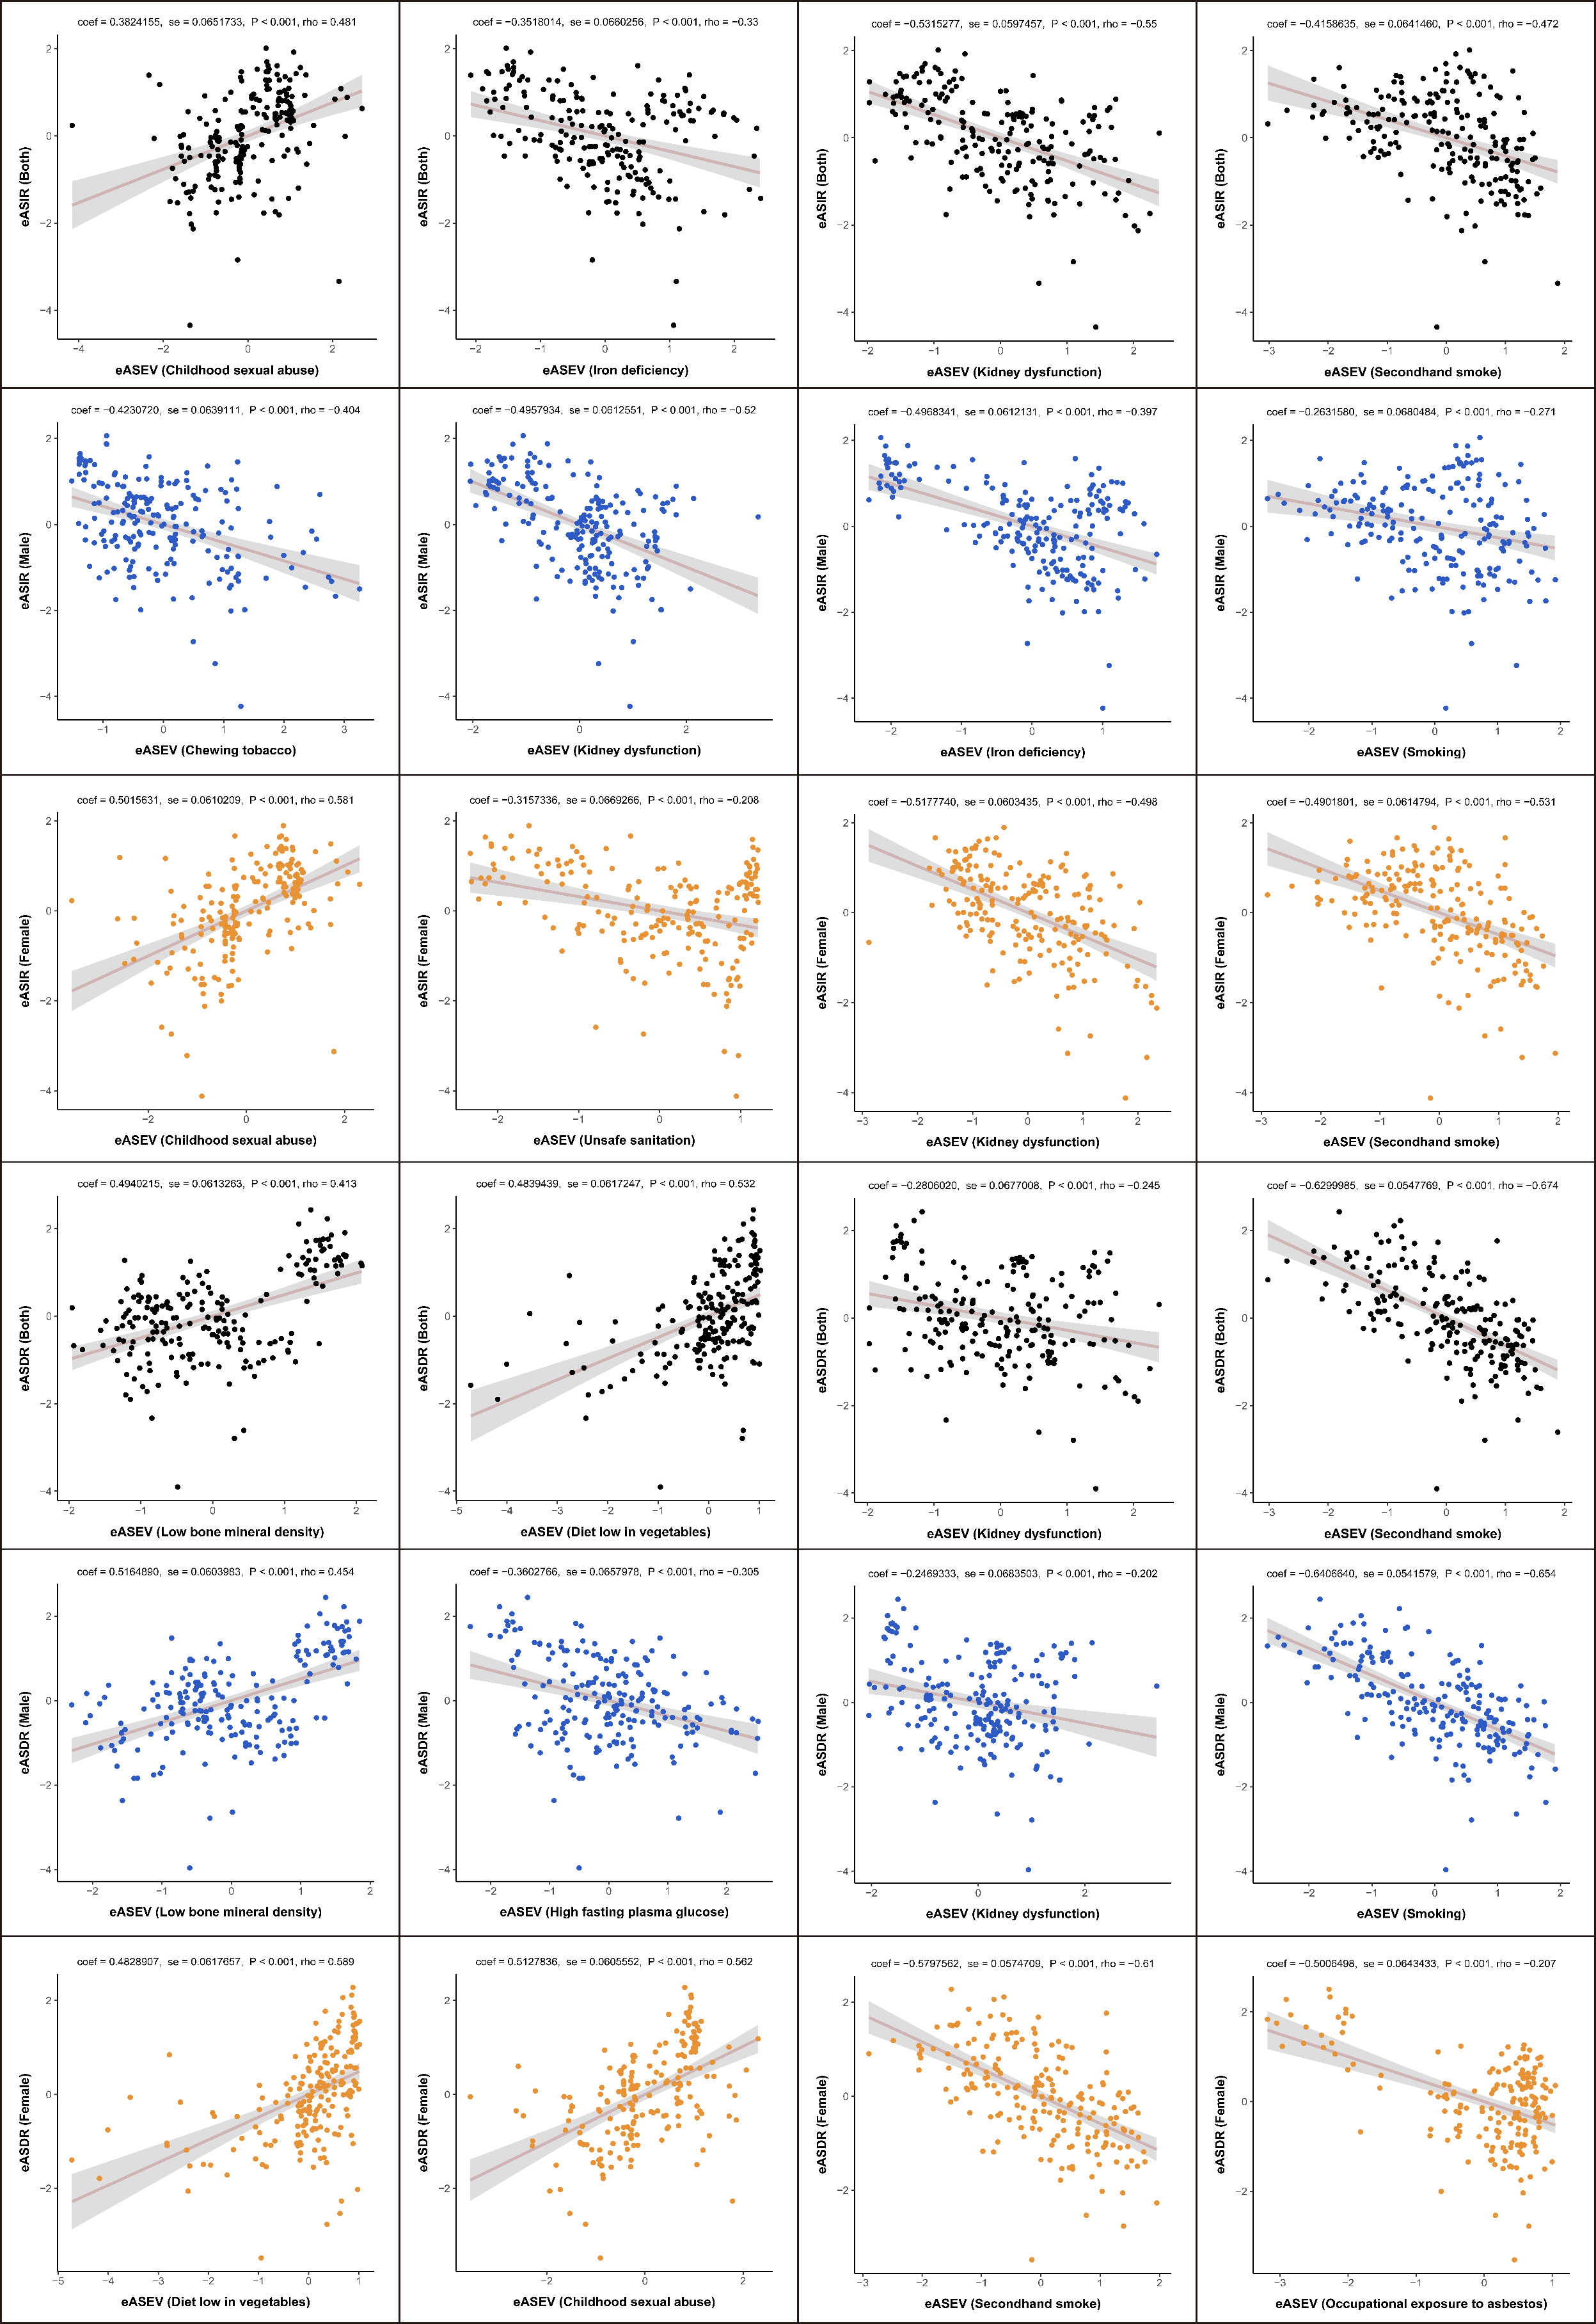


**Figure S7B** The correlation between potential risk factors and global incidence and mortality of Burkitt lymphoma by sex in 2021, < 20 years old.


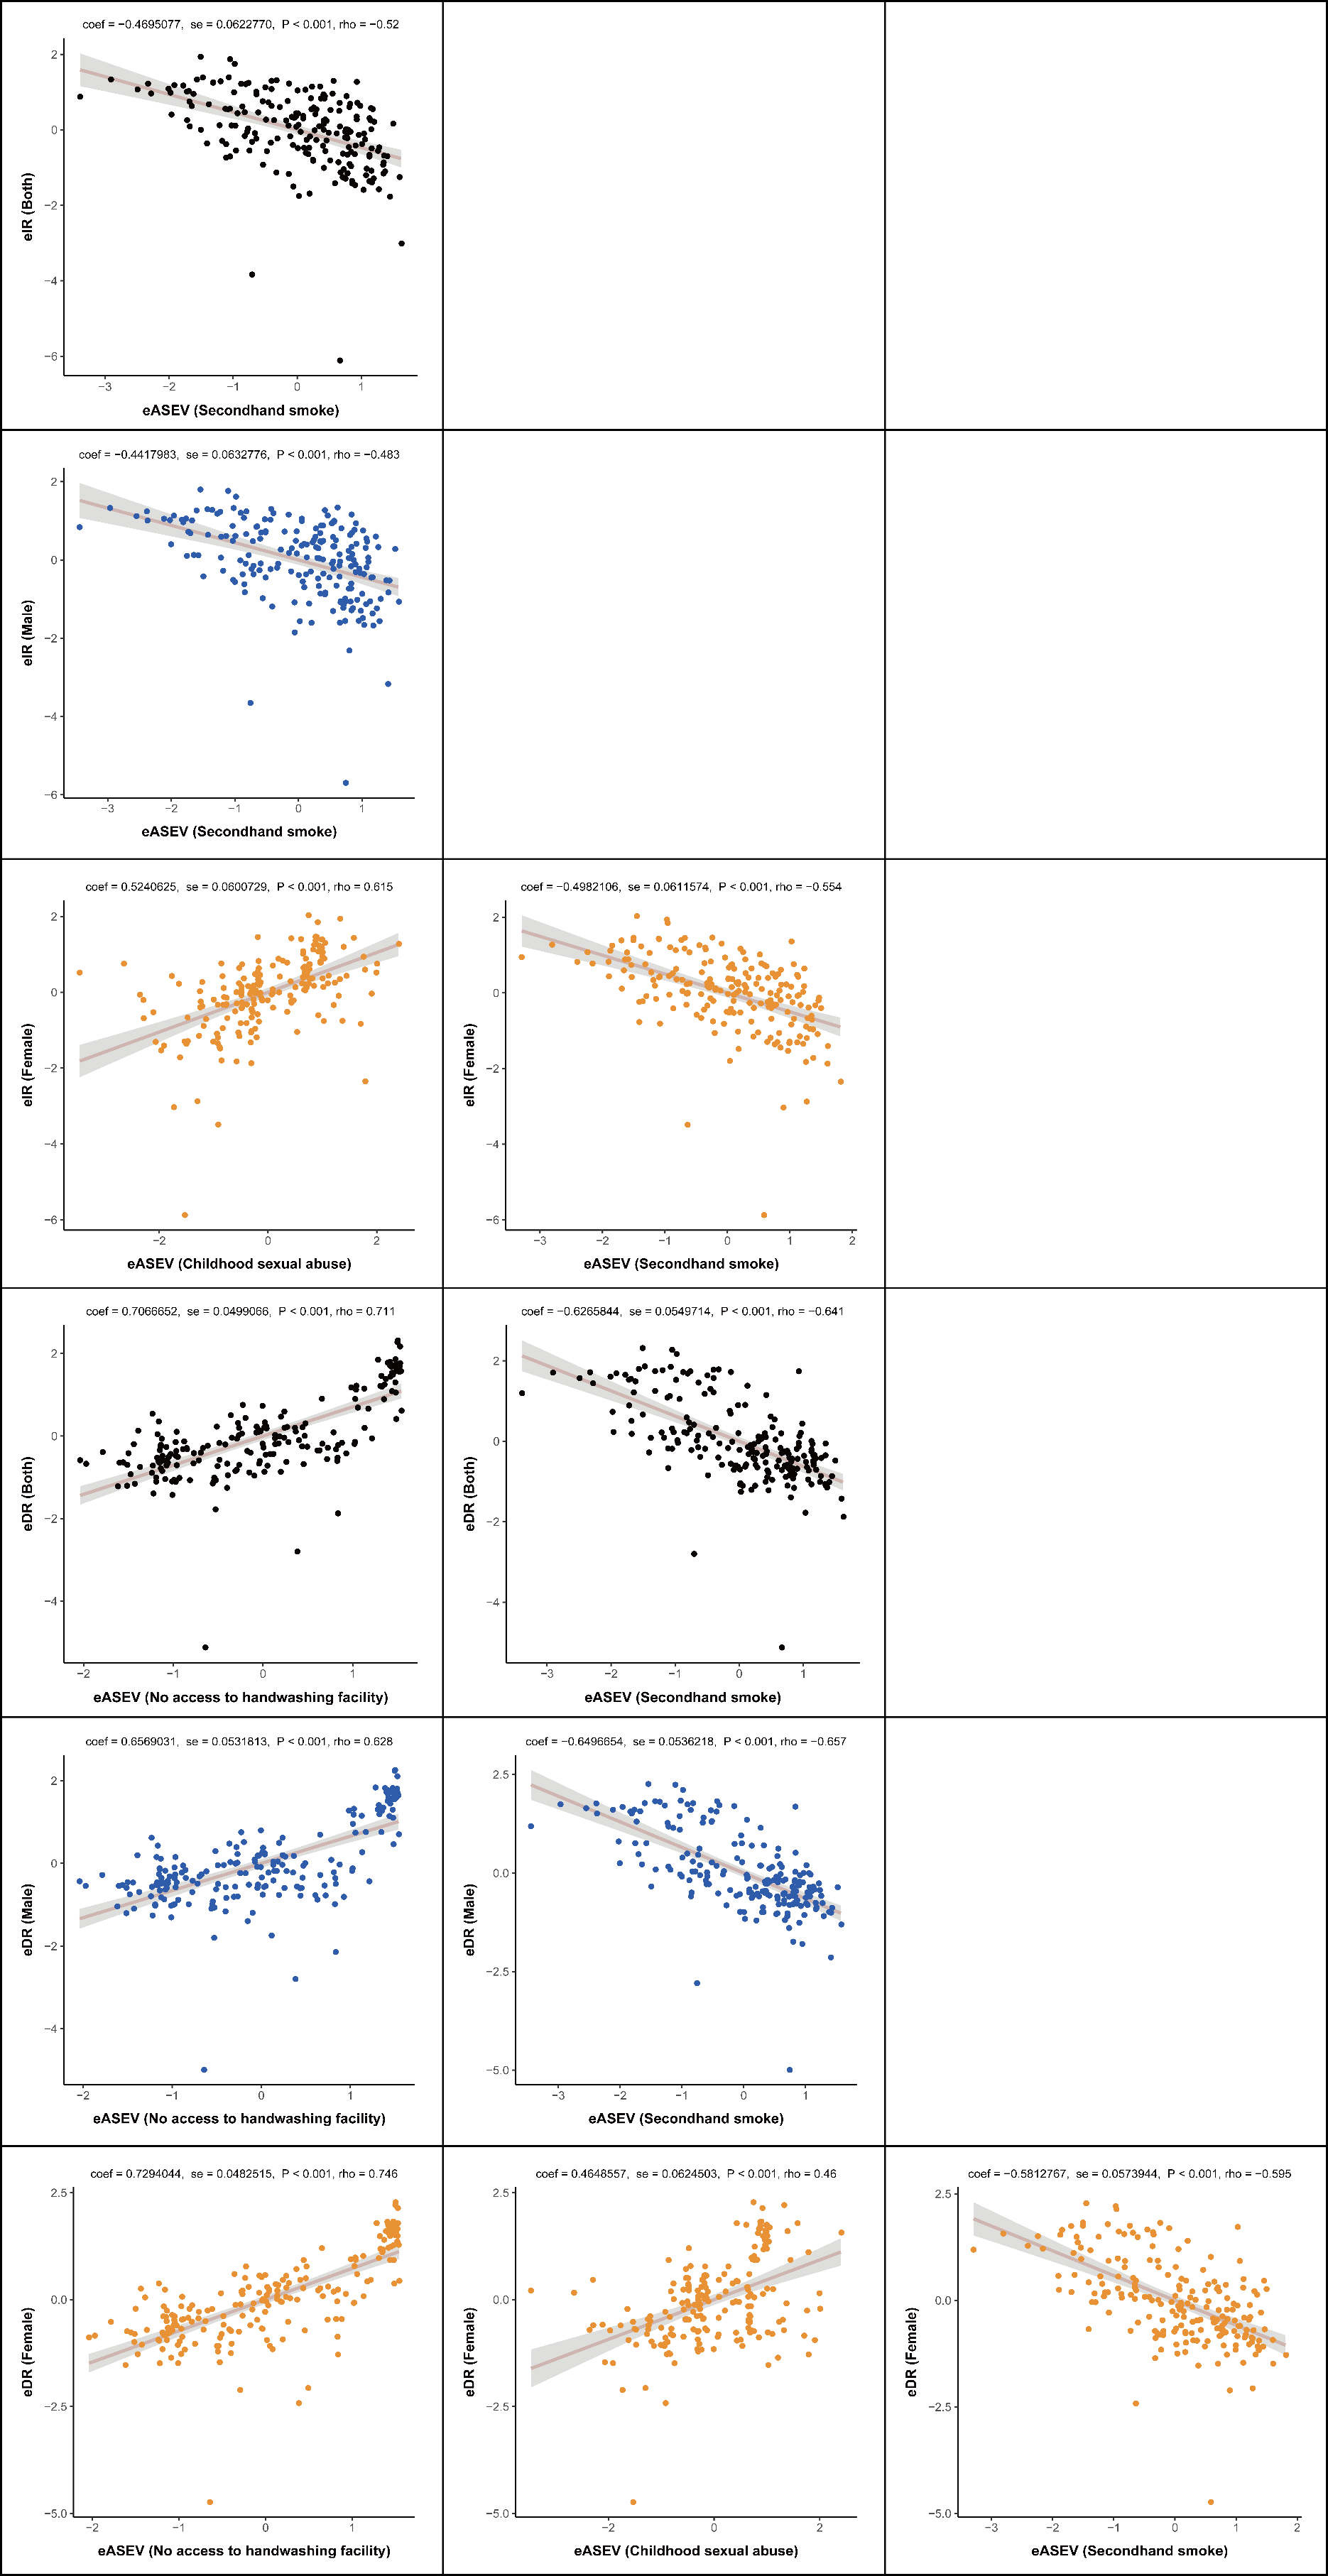


**Figure S7C** The correlation between potential risk factors and global incidence and mortality of Burkitt lymphoma by sex in 2021, 20-54 years old.


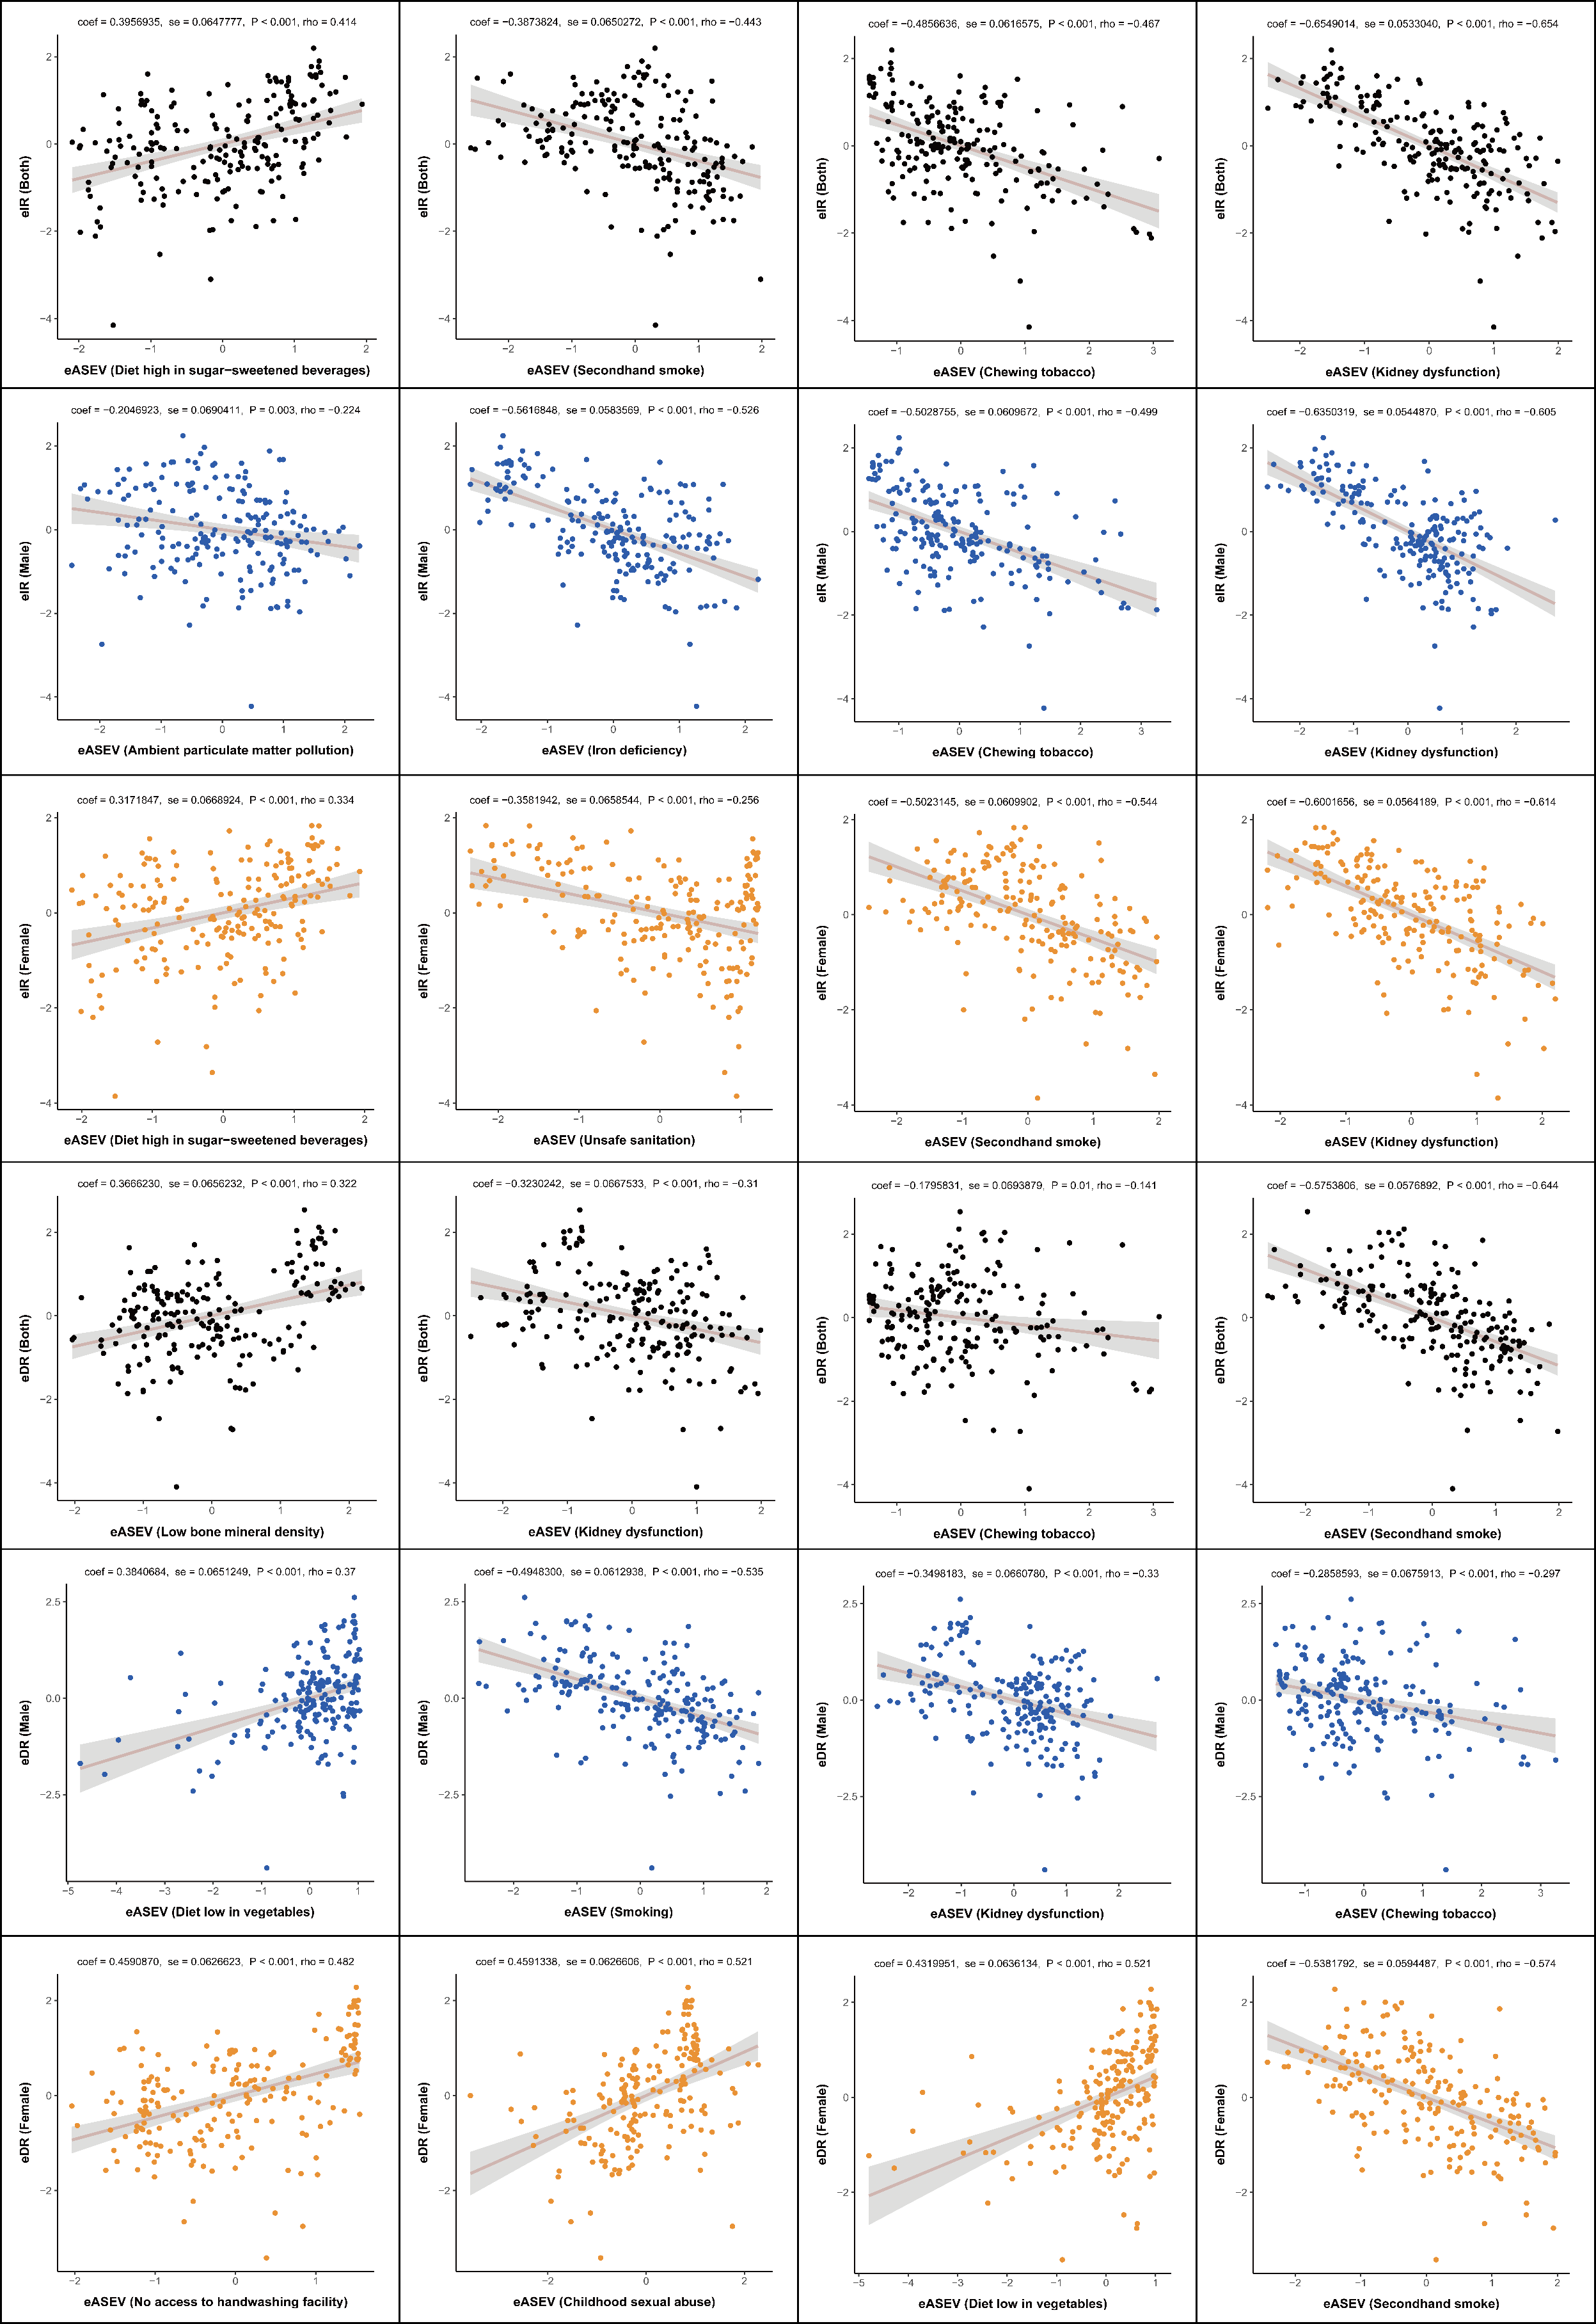


**Figure S7D** The correlation between potential risk factors and global incidence and mortality of Burkitt lymphoma by sex in 2021, > 54 years old.


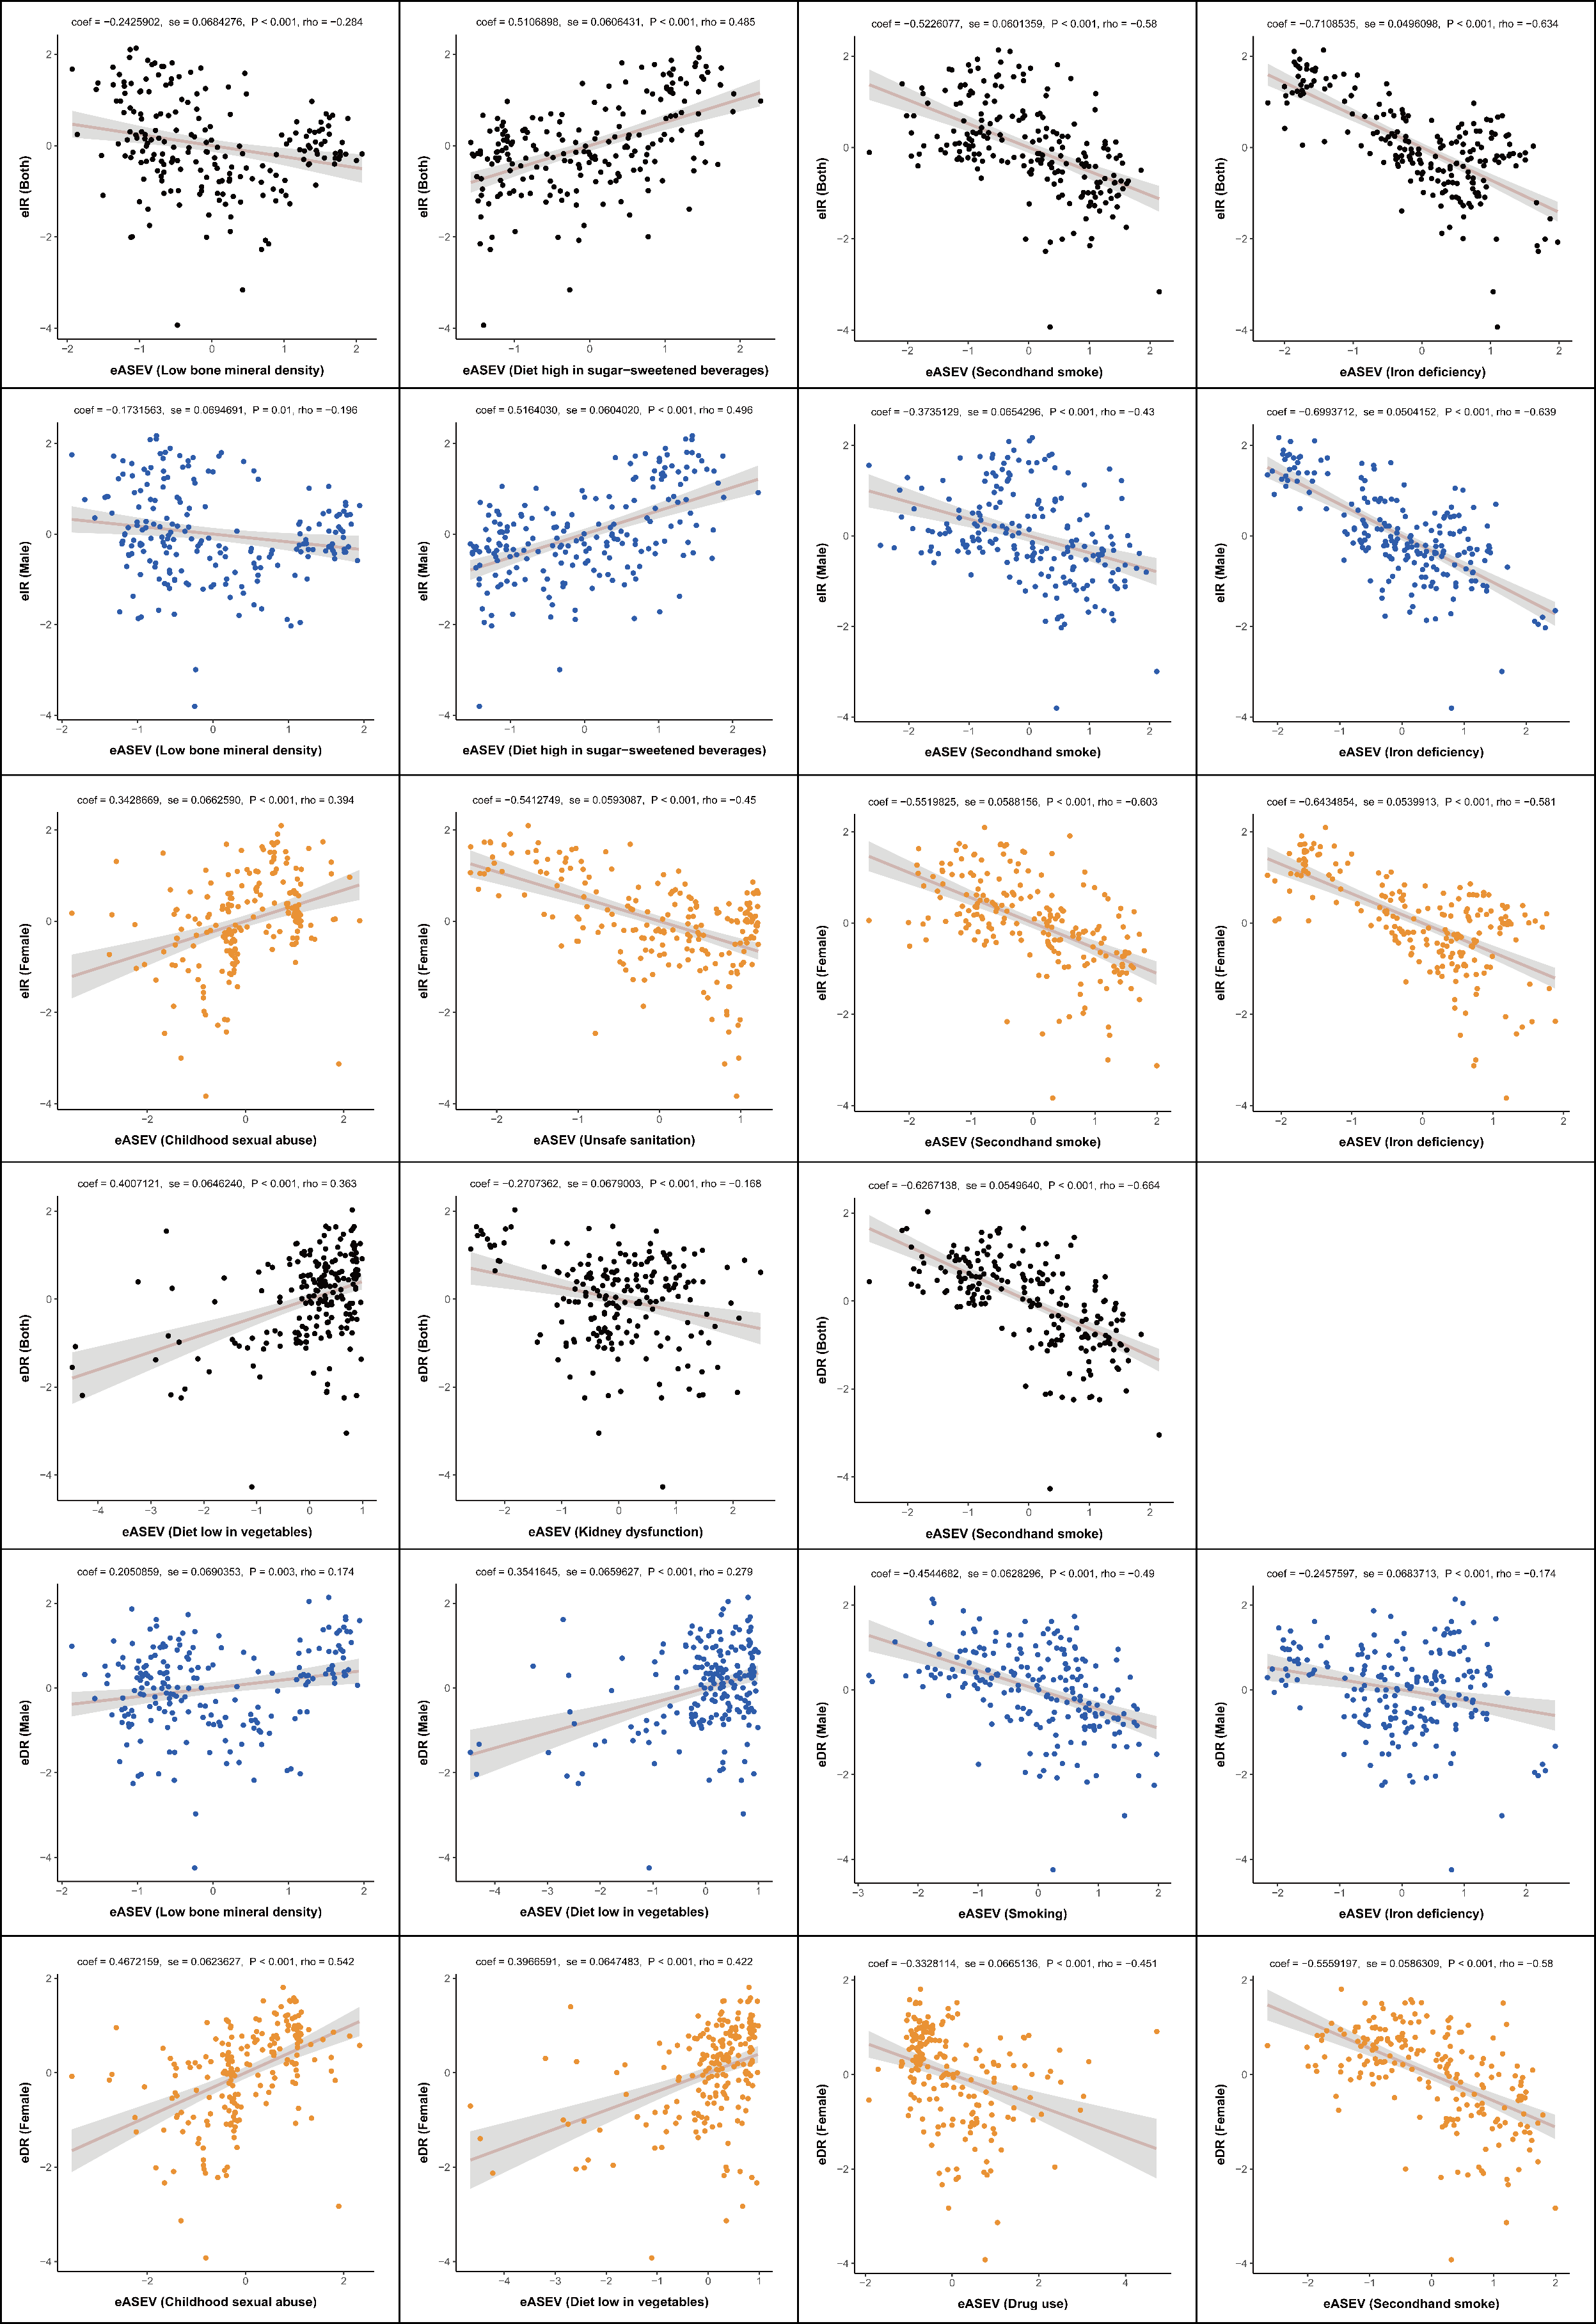


| **Table S1** Age-standardized incidence and mortality rate (95% confidence interval) of Burkitt lymphoma in 1990 and 2021, percentage changes in rates, and AAPC from 1990 to 2021 | | | | | | | | | |
| --- | --- | --- | --- | --- | --- | --- | --- | --- | --- |
| **Location** | **ASIR** | | | | **ASMR** | | | | |
| **1990** | **2021** | **Percentage change (%)** | **AAPC (%)** | **1990** | **2021** | **Percentage change (%)** | **AAPC (%)** |
| **Global** | 0.13 (0.09, 0.17) | 0.24 (0.12, 0.40) | 86.8 (2.4, 228.3) | 2.05 (1.94, 2.16) * | 0.07 (0.05, 0.09) | 0.09 (0.05, 0.12) | 18.9 (-12.0, 67.8) | 0.55 (0.49, 0.61) * |
| **SDI regions** |  |  |  |  |  |  |  |  |
| Low SDI | 0.26 (0.12, 0.40) | 0.22 (0.12, 0.33) | -15.5 (-35.3, 18.8) | -0.55 (-0.66, -0.44) * | 0.26 (0.11, 0.40) | 0.22 (0.11, 0.32) | -16.9 (-36.2, 14.5) | -0.61 (-0.71, -0.50) * |
| Low-middle SDI | 0.05 (0.03, 0.07) | 0.08 (0.05, 0.11) | 52.8 (11.6, 119.8) | 1.39 (1.24, 1.55) * | 0.05 (0.03, 0.07) | 0.06 (0.04, 0.08) | 23.5 (-10.1, 69.4) | 0.67 (0.59, 0.76) * |
| Middle SDI | 0.04 (0.03, 0.05) | 0.09 (0.05, 0.13) | 135.6 (24.4, 228.5) | 2.81 (2.64, 2.99) * | 0.03 (0.02, 0.04) | 0.04 (0.02, 0.05) | 6.4 (-40.5, 47.5) | 0.20 (0.11, 0.29) * |
| High-middle SDI | 0.09 (0.06, 0.12) | 0.23 (0.10, 0.43) | 157.5 (12.9, 382.8) | 3.11 (2.93, 3.29) * | 0.04 (0.03, 0.06) | 0.04 (0.02, 0.06) | -7.1 (-53.2, 42.5) | -0.24 (-0.41, -0.07) * |
| High SDI | 0.23 (0.16, 0.34) | 0.51 (0.21, 0.94) | 127.0 (-3.5, 384.0) | 2.70 (2.55, 2.85) * | 0.05 (0.03, 0.07) | 0.06 (0.03, 0.11) | 31.1 (-43.3, 173.2) | 0.88 (0.67, 1.09) * |
| **GBD super regions and GBD regions** | | |  |  |  |  |  |  |
| **Central Europe, Eastern Europe, and Central Asia** | 0.06 (0.04, 0.08) | 0.11 (0.04, 0.19) | 91.8 (-22.0, 217.1) | 2.19 (1.89, 2.48) * | 0.03 (0.02, 0.04) | 0.02 (0.01, 0.04) | -9.8 (-62.4, 41.6) | -0.42 (-0.61, -0.23) * |
| Central Asia | 0.03 (0.02, 0.05) | 0.02 (0.01, 0.03) | -25.0 (-58.6, 75.6) | -0.92 (-1.57, -0.27) * | 0.02 (0.01, 0.03) | 0.01 (0.01, 0.01) | -47.5 (-70.9, 7.4) | -2.09 (-2.72, -1.45) * |
| Central Europe | 0.06 (0.04, 0.09) | 0.19 (0.07, 0.35) | 233.7 (9.2, 750.1) | 3.93 (3.59, 4.27) * | 0.03 (0.02, 0.04) | 0.04 (0.01, 0.06) | 34.1 (-56.6, 223.5) | 0.92 (0.66, 1.17) * |
| Eastern Europe | 0.06 (0.04, 0.10) | 0.09 (0.04, 0.15) | 41.3 (-35.7, 94.3) | 1.16 (0.70, 1.61) * | 0.03 (0.02, 0.04) | 0.02 (0.01, 0.03) | -25.8 (-65.8, -1.4) | -1.05 (-1.24, -0.85) * |
| **High-income** | 0.25 (0.18, 0.37) | 0.60 (0.24, 1.15) | 141.3 (-0.7, 436.4) | 2.93 (2.77, 3.09) * | 0.05 (0.04, 0.08) | 0.07 (0.03, 0.13) | 36.7 (-41.5, 186.2) | 1.02 (0.82, 1.22) * |
| Australasia | 0.23 (0.16, 0.34) | 0.45 (0.17, 0.97) | 96.7 (-19.5, 352.8) | 2.25 (1.99, 2.51) * | 0.04 (0.03, 0.06) | 0.04 (0.02, 0.09) | 2.5 (-56.4, 130.1) | 0.04 (-0.35, 0.45) |
| High-income Asia Pacific | 0.16 (0.07, 0.26) | 0.39 (0.15, 0.69) | 149.5 (-2.5, 780.1) | 3.08 (2.76, 3.39) * | 0.03 (0.02, 0.05) | 0.04 (0.02, 0.07) | 26.6 (-50.6, 299.5) | 0.77 (0.44, 1.10) * |
| High-income North America | 0.38 (0.27, 0.56) | 0.71 (0.33, 1.16) | 87.1 (-4.8, 225.2) | 1.96 (1.62, 2.30) * | 0.07 (0.05, 0.11) | 0.09 (0.04, 0.15) | 31.1 (-33.0, 128.4) | 0.88 (0.57, 1.19) * |
| Southern Latin America | 0.20 (0.13, 0.30) | 0.54 (0.27, 0.92) | 175.4 (41.5, 441.2) | 3.33 (2.90, 3.76) * | 0.13 (0.09, 0.18) | 0.16 (0.08, 0.27) | 26.9 (-32.9, 137.2) | 0.82 (0.58, 1.06) * |
| Western Europe | 0.21 (0.15, 0.31) | 0.62 (0.19, 1.43) | 201.2 (-9.6, 717.7) | 3.63 (3.40, 3.87) * | 0.04 (0.03, 0.07) | 0.06 (0.02, 0.14) | 45.0 (-56.1, 279.9) | 1.29 (1.10, 1.48) * |
| **Latin America and Caribbean** | 0.10 (0.07, 0.14) | 0.22 (0.11, 0.35) | 132.0 (11.1, 327.7) | 2.76 (2.52, 3.01) * | 0.08 (0.06, 0.12) | 0.10 (0.05, 0.14) | 21.6 (-39.3, 112.2) | 0.70 (0.60, 0.80) * |
| Andean Latin America | 0.08 (0.05, 0.12) | 0.20 (0.08, 0.34) | 162.6 (-17.6, 433.8) | 3.23 (2.86, 3.60) * | 0.07 (0.05, 0.12) | 0.08 (0.04, 0.14) | 15.4 (-63.4, 129.0) | 0.47 (0.07, 0.88) * |
| Caribbean | 0.17 (0.10, 0.28) | 0.21 (0.13, 0.32) | 22.3 (-33.8, 158.3) | 0.61 (0.13, 1.09) * | 0.10 (0.06, 0.16) | 0.09 (0.05, 0.14) | -8.6 (-50.5, 68.0) | -0.28 (-0.51, -0.04) * |
| Central Latin America | 0.08 (0.05, 0.12) | 0.21 (0.11, 0.33) | 163.6 (38.2, 435.4) | 3.16 (2.69, 3.63) * | 0.07 (0.05, 0.11) | 0.09 (0.05, 0.13) | 26.5 (-30.0, 143.3) | 0.77 (0.63, 0.91) * |
| Tropical Latin America | 0.10 (0.07, 0.15) | 0.24 (0.11, 0.39) | 146.7 (11.5, 341.1) | 2.99 (2.72, 3.27) * | 0.09 (0.06, 0.13) | 0.11 (0.05, 0.17) | 26.9 (-40.4, 123.3) | 0.75 (0.57, 0.93) * |
| **North Africa and Middle East** | 0.06 (0.04, 0.09) | 0.14 (0.08, 0.20) | 119.6 (33.4, 230.1) | 2.55 (2.22, 2.88) * | 0.05 (0.03, 0.08) | 0.04 (0.03, 0.06) | -19.3 (-50.2, 15.0) | -0.73 (-1.00, -0.46) * |
| **South Asia** | 0.03 (0.01, 0.04) | 0.03 (0.01, 0.04) | 9.4 (-59.7, 131.0) | 0.30 (0.01, 0.59) * | 0.02 (0.01, 0.04) | 0.02 (0.01, 0.03) | -10.2 (-67.4, 83.9) | -0.36 (-0.68, -0.05) * |
| **Southeast Asia, East Asia, and Oceania** | 0.02 (0.01, 0.04) | 0.07 (0.03, 0.10) | 178.8 (46.0, 319.4) | 3.39 (3.16, 3.61) * | 0.02 (0.01, 0.03) | 0.02 (0.01, 0.02) | -17.4 (-52.0, 20.1) | -0.70 (-0.85, -0.54) * |
| East Asia | 0.03 (0.01, 0.04) | 0.08 (0.04, 0.11) | 182.6 (45.1, 349.1) | 3.52 (3.23, 3.81) * | 0.02 (0.01, 0.03) | 0.01 (0.01, 0.02) | -36.8 (-65.7, 4.9) | -1.42 (-1.71, -1.13) * |
| Oceania | 0.02 (0.01, 0.03) | 0.04 (0.02, 0.08) | 98.3 (-5.4, 238.5) | 2.29 (2.04, 2.54) * | 0.02 (0.01, 0.03) | 0.04 (0.02, 0.08) | 87.8 (-12.9, 222.3) | 2.10 (1.88, 2.32) * |
| Southeast Asia | 0.02 (0.01, 0.03) | 0.04 (0.02, 0.07) | 150.6 (34.0, 253.7) | 2.98 (2.81, 3.15) * | 0.02 (0.01, 0.02) | 0.02 (0.01, 0.03) | 43.1 (-16.3, 97.5) | 1.07 (0.90, 1.25) * |
| **Sub-Saharan Africa** | 0.33 (0.14, 0.49) | 0.29 (0.15, 0.43) | -11.2 (-30.0, 21.8) | -0.38 (-0.55, -0.21) * | 0.32 (0.14, 0.48) | 0.27 (0.14, 0.40) | -15.6 (-33.8, 13.5) | -0.55 (-0.66, -0.45) * |
| Central Sub-Saharan Africa | 0.27 (0.10, 0.44) | 0.20 (0.08, 0.31) | -26.4 (-49.6, 13.2) | -1.02 (-1.22, -0.82) * | 0.26 (0.10, 0.43) | 0.19 (0.07, 0.31) | -27.5 (-49.9, 13.4) | -1.07 (-1.26, -0.87) * |
| Eastern Sub-Saharan Africa | 0.48 (0.20, 0.73) | 0.39 (0.19, 0.61) | -18.9 (-40.6, 14.3) | -0.67 (-0.80, -0.53) * | 0.47 (0.19, 0.72) | 0.37 (0.18, 0.59) | -20.6 (-41.2, 11.9) | -0.75 (-0.87, -0.62) * |
| Southern Sub-Saharan Africa | 0.03 (0.02, 0.05) | 0.07 (0.03, 0.11) | 127.9 (28.3, 237.9) | 2.67 (2.11, 3.23) * | 0.03 (0.02, 0.04) | 0.06 (0.03, 0.09) | 98.0 (14.5, 202.7) | 2.17 (1.71, 2.62) * |
| Western Sub-Saharan Africa | 0.28 (0.13, 0.41) | 0.27 (0.14, 0.39) | -2.6 (-23.8, 26.8) | -0.08 (-0.18, 0.02) | 0.27 (0.12, 0.40) | 0.24 (0.13, 0.34) | -11.1 (-28.5, 16.3) | -0.40 (-0.52, -0.28) * |
| **Note:** * Indicates that the AAPC is significantly different from zero at the α = 0.05 level.  **Abbreviation:** AAPC, average annual percent change; ASIR, age-standardized incidence rate; ASMR, age-standardized mortality rate. | | | | | | | | |

| **Table S2** Age-standardized rate of prevalence and DALYs (95% confidence interval) of Burkitt lymphoma in 1990 and 2021, percentage changes, and AAPC from 1990 to 2021 | | | | | | | | | |
| --- | --- | --- | --- | --- | --- | --- | --- | --- | --- |
| **Location** | **ASPR** | | | | **ASDR** | | | | |
| **1990** | **2021** | **Percentage change (%)** | **AAPC (%)** | **1990** | **2021** | **Percentage change (%)** | **AAPC (%)** |
| **Global** | 0.86 (0.63, 1.15) | 1.57 (0.84, 2.55) | 82.9 (3.9, 214.0) | 1.98 (1.87, 2.08) * | 4.62 (2.82, 6.37) | 5.30 (3.29, 6.89) | 14.6 (-12.2, 56.4) | 0.43 (0.34, 0.52) * |
| **SDI regions** |  |  |  |  |  |  |  |  |
| Low SDI | 1.94 (0.86, 2.92) | 1.64 (0.87, 2.41) | -15.3 (-35.6, 19.0) | -0.54 (-0.67, -0.41) * | 18.36 (8.33, 27.89) | 14.46 (7.95, 19.89) | -21.2 (-41.0, 13.2) | -0.78 (-0.89, -0.66) * |
| Low-middle SDI | 0.39 (0.23, 0.54) | 0.59 (0.38, 0.78) | 50.6 (9.6, 118.3) | 1.33 (1.15, 1.50) * | 3.62 (1.97, 5.11) | 4.18 (2.71, 5.41) | 15.5 (-18.6, 64.1) | 0.44 (0.37, 0.51) * |
| Middle SDI | 0.27 (0.19, 0.36) | 0.61 (0.34, 0.87) | 128.7 (21.1, 216.2) | 2.72 (2.61, 2.82) * | 1.96 (1.33, 2.49) | 1.85 (1.04, 2.47) | -5.4 (-45.8, 24.4) | -0.18 (-0.26, -0.11) * |
| High-middle SDI | 0.61 (0.43, 0.84) | 1.52 (0.68, 2.75) | 150.5 (12.1, 358.7) | 3.02 (2.84, 3.21) * | 2.41 (1.56, 3.23) | 1.87 (0.98, 2.73) | -22.4 (-58.6, 6.3) | -0.84 (-0.98, -0.70) * |
| High SDI | 1.49 (1.07, 2.27) | 3.37 (1.42, 6.05) | 125.7 (-2.4, 374.6) | 2.68 (2.54, 2.83) * | 2.09 (1.54, 3.01) | 2.50 (1.17, 3.92) | 19.8 (-43.9, 119.9) | 0.59 (0.38, 0.79) * |
| **GBD super regions and GBD regions** | | |  |  |  |  |  |  |
| **Central Europe, Eastern Europe, and Central Asia** | 0.40 (0.26, 0.56) | 0.73 (0.29, 1.25) | 84.2 (-25.6, 196.4) | 2.05 (1.76, 2.34) * | 1.51 (1.02, 2.12) | 1.15 (0.50, 1.79) | -24.2 (-68.6, 8.1) | -0.94 (-1.23, -0.65) * |
| Central Asia | 0.20 (0.11, 0.31) | 0.15 (0.08, 0.23) | -25.9 (-59.9, 69.4) | -0.96 (-1.60, -0.32) * | 0.99 (0.61, 1.50) | 0.50 (0.30, 0.78) | -49.0 (-72.8,-1.4) | -2.19 (-2.69, -1.68) * |
| Central Europe | 0.39 (0.25, 0.62) | 1.30 (0.50, 2.35) | 230.3 (6.9, 721.6) | 3.89 (3.56, 4.23) * | 1.34 (0.88, 2.19) | 1.63 (0.66, 2.64) | 21.1 (-62.0, 157.2) | 0.56 (0.31, 0.81) * |
| Eastern Europe | 0.47 (0.28, 0.71) | 0.65 (0.26, 1.05) | 38.0 (-38.1, 90.1) | 1.07 (0.61, 1.53) * | 1.83 (1.14, 2.59) | 1.19 (0.49, 1.86) | -34.6 (-71.3, -12.3) | -1.47 (-1.70, -1.25) * |
| **High-income** | 1.66 (1.19, 2.50) | 3.97 (1.62, 7.49) | 139.8 (-0.4, 426.8) | 2.91 (2.75, 3.08) * | 2.42 (1.78, 3.55) | 3.04 (1.41, 4.99) | 25.7 (-42.4, 137.5) | 0.74 (0.53, 0.96) * |
| Australasia | 1.54 (1.08, 2.30) | 3.01 (1.19, 6.33) | 94.8 (-18.8, 346.4) | 2.22 (1.95, 2.49) * | 1.93 (1.36, 2.83) | 1.83 (0.81, 3.37) | -4.8 (-57.3, 96.5) | -0.23 (-0.68, 0.22) |
| High-income Asia Pacific | 1.01 (0.47, 1.70) | 2.56 (1.01, 4.43) | 152.3 (-0.9, 780.2) | 3.11 (2.79, 3.44) * | 1.29 (0.71, 1.99) | 1.55 (0.62, 2.49) | 19.9 (-51.8, 231.8) | 0.56 (0.20, 0.92) * |
| High-income North America | 2.53 (1.77, 3.73) | 4.66 (2.24, 7.37) | 84.2 (-4.0, 212.6) | 1.91 (1.58, 2.25) * | 3.11 (2.21, 4.48) | 3.67 (1.92, 5.31) | 18.0 (-33.7, 81.3) | 0.54 (0.17, 0.90) * |
| Southern Latin America | 1.36 (0.90, 2.01) | 3.67 (1.86, 6.14) | 170.4 (41.3, 427.2) | 3.27 (2.87, 3.66) * | 6.11 (4.31, 8.89) | 6.85 (3.62, 10.84) | 12.1 (-38.6, 101.7) | 0.37 (0.06, 0.67) * |
| Western Europe | 1.38 (0.99, 2.13) | 4.11 (1.31, 9.26) | 197.5 (-10.6, 691.9) | 3.59 (3.37, 3.82) * | 1.96 (1.44, 3.01) | 2.61 (0.88, 5.29) | 33.3 (-58.6, 219.6) | 0.98 (0.72, 1.24) * |
| **Latin America and Caribbean** | 0.67 (0.48, 1.00) | 1.54 (0.78, 2.38) | 128.2 (9.4, 317.1) | 2.71 (2.47, 2.94) * | 4.34 (3.28, 6.40) | 4.62 (2.56, 6.29) | 6.6 (-45.9, 67.3) | 0.23 (0.08, 0.39) * |
| Andean Latin America | 0.55 (0.39, 0.88) | 1.39 (0.57, 2.40) | 150.1 (-17.9, 394.5) | 3.07 (2.72, 3.41) * | 4.49 (3.12, 7.13) | 4.04 (2.00, 6.41) | -10.0 (-67.7, 61.4) | -0.33 (-0.65, -0.01) * |
| Caribbean | 1.22 (0.75, 2.00) | 1.45 (0.86, 2.20) | 18.9 (-35.2, 146.5) | 0.52 (0.05, 0.99) * | 5.73 (3.59, 9.92) | 4.97 (2.55, 8.33) | -13.2 (-52.9, 50.5) | -0.44 (-0.65, -0.23) * |
| Central Latin America | 0.55 (0.38, 0.85) | 1.44 (0.75, 2.29) | 159.4 (35.5, 419.2) | 3.11 (2.64, 3.58) * | 3.61 (2.58, 5.36) | 4.09 (2.23, 5.74) | 13.1 (-39.6, 95.8) | 0.37 (0.20, 0.55) * |
| **North Africa and Middle East** | 0.45 (0.27, 0.68) | 0.95 (0.54, 1.39) | 111.5 (28.4, 210.3) | 2.41 (2.07, 2.75) * | 3.26 (2.00, 5.05) | 2.26 (1.41, 3.36) | -30.8 (-57.5, 5.7) | -1.20 (-1.36, -1.04) * |
| **South Asia** | 0.19 (0.08, 0.29) | 0.20 (0.10, 0.30) | 9.4 (-59.3, 136.1) | 0.30 (0.00, 0.60) | 1.80 (0.71, 2.91) | 1.59 (0.79, 2.45) | -11.8 (-68.4, 93.3) | -0.43 (-0.78, -0.07) * |
| **Southeast Asia, East Asia, and Oceania** | 0.18 (0.09, 0.26) | 0.46 (0.22, 0.64) | 160.3 (36.0, 316.5) | 3.14 (2.61, 3.68) * | 1.24 (0.58, 1.77) | 0.82 (0.46, 1.08) | -34.2 (-62.4, 10.8) | -1.35 (-1.59, -1.10) * |
| East Asia | 0.20 (0.10, 0.30) | 0.53 (0.25, 0.74) | 163.9 (33.3, 351.8) | 3.22 (2.93, 3.52) * | 1.42 (0.67, 2.06) | 0.69 (0.36, 0.96) | -51.7 (-76.0,-5.5) | -2.33 (-2.61, -2.06) * |
| Oceania | 0.15 (0.09, 0.23) | 0.30 (0.12, 0.53) | 97.9 (-5.4, 245.3) | 2.29 (2.03, 2.55) * | 1.09 (0.60, 1.80) | 2.01 (0.75, 3.75) | 84.8 (-10.8, 219.8) | 2.11 (1.68, 2.54) * |
| Southeast Asia | 0.12 (0.06, 0.18) | 0.30 (0.14, 0.45) | 142.4 (28.6, 244.3) | 2.87 (2.69, 3.05) * | 0.89 (0.41, 1.42) | 1.06 (0.55, 1.47) | 19.5 (-31.2, 77.2) | 0.50 (0.32, 0.68) * |
| **Sub-Saharan Africa** | 2.41 (1.06, 3.54) | 2.13 (1.08, 3.09) | -11.7 (-30.6, 22.1) | -0.39 (-0.52, -0.27) * | 22.70 (10.34, 33.88) | 17.74 (9.52, 24.56) | -21.8 (-40.1, 8.6) | -0.80 (-0.90, -0.70) * |
| Central Sub-Saharan Africa | 1.95 (0.74, 3.20) | 1.42 (0.57, 2.18) | -27.6 (-50.2, 13.7) | -1.07 (-1.26, -0.88) * | 17.39 (6.88, 29.54) | 10.80 (4.74, 16.42) | -37.9 (-57.4, 7.7) | -1.56 (-1.72, -1.39) * |
| Eastern Sub-Saharan Africa | 3.48 (1.45, 5.30) | 2.82 (1.38, 4.44) | -18.9 (-40.9, 16.1) | -0.67 (-0.84, -0.49) * | 31.84 (13.58, 48.68) | 23.37 (12.15, 33.72) | -26.6 (-46.8, 7.7) | -1.00 (-1.18, -0.82) * |
| Southern Sub-Saharan Africa | 0.23 (0.13, 0.32) | 0.50 (0.23, 0.74) | 123.5 (28.5, 236.0) | 2.59 (2.03, 3.16) * | 1.92 (1.15, 2.75) | 3.83 (1.84, 5.78) | 99.4 (18.1, 218.1) | 2.21 (1.62, 2.80) * |
| Western Sub-Saharan Africa | 2.05 (0.96, 3.02) | 1.98 (1.06, 2.72) | -3.7 (-25.4, 26.3) | -0.12 (-0.21, -0.02) * | 20.29 (9.25, 29.46) | 16.75 (8.96, 22.73) | -17.5 (-34.8, 11.6) | -0.63 (-0.73, -0.52) * |
| **Note:** * Indicates that the AAPC is significantly different from zero at the α = 0.05 level.  **Abbreviation:** DALYs, disability-adjusted life years; AAPC, average annual percent change; ASPR, age-standardized prevalence rate; ASDR, age-standardized rate of disability-adjusted life years. | | | | | | | | |

| **Table S3** The contribution of population growth, population ageing, age-specific prevalence rate variations, and disease severity to the total percent change in DALYs for Burkitt lymphoma between 1990 and 2021 by region | | | | | |
| --- | --- | --- | --- | --- | --- |
| **Location** | **Population growth** | **Population ageing** | **Age-specific prevalence rate variations** | **Disease Severity** | **Total change in DALYs** |
| Global | 48.56% | -18.26% | 43.82% | -27.53% | 46.59% |
| Low SDI | 103.47% | -11.80% | -33.13% | -2.82% | 55.72% |
| Low-middle SDI | 63.08% | -27.91% | 38.37% | -22.68% | 50.85% |
| Middle SDI | 41.32% | -14.54% | 79.41% | -88.84% | 17.35% |
| High-middle SDI | 22.72% | -2.80% | 87.31% | -106.44% | 0.79% |
| High SDI | 31.99% | 19.41% | 113.37% | -78.61% | 86.16% |
| Central Europe, Eastern Europe, and Central Asia | -0.69% | -2.60% | 50.38% | -68.09% | -20.99% |
| Central Asia | 27.47% | -5.45% | -26.31% | -30.35% | -34.64% |
| Central Europe | -10.91% | 6.52% | 151.98% | -120.75% | 26.84% |
| Eastern Europe | -7.36% | -6.64% | 25.47% | -51.03% | -39.55% |
| High-income | 27.23% | 18.22% | 123.64% | -82.09% | 87.01% |
| Australasia | 59.39% | 15.08% | 89.09% | -90.01% | 73.55% |
| High-income Asia Pacific | 10.37% | 47.22% | 135.50% | -100.38% | 92.71% |
| High-income North America | 39.50% | 18.96% | 84.71% | -52.10% | 91.07% |
| Southern Latin America | 44.22% | 5.30% | 124.34% | -113.41% | 60.45% |
| Western Europe | 20.59% | 17.76% | 167.46% | -114.09% | 91.73% |
| Latin America and Caribbean | 54.12% | -7.61% | 85.04% | -83.96% | 47.60% |
| Andean Latin America | 68.79% | -13.55% | 79.55% | -105.16% | 29.63% |
| Caribbean | 30.95% | -9.39% | -1.63% | -13.44% | 6.50% |
| Central Latin America | 59.21% | -6.68% | 109.88% | -104.10% | 58.31% |
| Tropical Latin America | 53.14% | -6.22% | 98% | -90.33% | 54.59% |
| North Africa and Middle East | 69.78% | -11.91% | 54.82% | -106.83% | 5.86% |
| South Asia | 56.78% | -31.70% | 6.58% | -20.26% | 11.41% |
| Southeast Asia, East Asia, and Oceania | 26.76% | -4.05% | 75.77% | -116.19% | -17.70% |
| East Asia | 18.17% | -2.68% | 76.11% | -131.34% | -39.75% |
| Oceania | 156.29% | -10.76% | 133.01% | -5.70% | 272.82% |
| Southeast Asia | 53.57% | -10.20% | 86.97% | -72.55% | 57.79% |
| Sub-Saharan Africa | 109.82% | -9.65% | -31.28% | -7.99% | 60.90% |
| Central Sub-Saharan Africa | 111.10% | -8.88% | -71.58% | -2.17% | 28.48% |
| Eastern Sub-Saharan Africa | 99.77% | -11.39% | -42.43% | -3.35% | 42.61% |
| Southern Sub-Saharan Africa | 73.18% | -34.48% | 133.59% | -18.44% | 153.85% |
| Western Sub-Saharan Africa | 134.60% | -6.46% | -20.27% | -14.47% | 93.39% |
| **Abbreviation:** DALYs, disability-adjusted life years; SDI, socio-demographic index. | | | | | |

| **Table S4** Projections of AAPCs (95% confidence interval) in Burkitt lymphoma health burden rates by age group, per 100,000 person-years, 2021-2040 | | | | | |
| --- | --- | --- | --- | --- | --- |
| **Sex** | **Age group** | **Incidence** | **Mortality** | **Prevalence** | **DALYs** |
| Both | < 20 years | -2.41 (-2.43, -2.40) | -2.94 (-2.94, -2.93) | -2.65 (-2.67, -2.64) | -3.23 (-3.24, -3.21) |
| 20-54 years | 0.36 (0.35, 0.37) | 0.83 (0.83, 0.84) | 0.11 (0.09, 0.13) | 0.86 (0.85, 0.87) |
| >54 years | -1.15 (-1.16, -1.14) | -0.72 (-0.72, -0.72) | -1.56 (-1.56, -1.55) | -1.31 (-1.35, -1.26) |
| Male | < 20 years | -1.81 (-1.82, -1.79) | -2.28 (-2.29, -2.26) | -2.26 (-2.29, -2.24) | -2.74 (-2.76, -2.72) |
| 20-54 years | 0.29 (0.28, 0.30) | 0.68 (0.68, 0.69) | 0.05 (0.03, 0.06) | 0.73 (0.73, 0.74) |
| >54 years | -1.06 (-1.07, -1.05) | -0.69 (-0.69, -0.69) | -1.47 (-1.49, -1.46) | -1.23 (-1.25, -1.21) |
| Female | < 20 years | -3.38 (-3.40, -3.37) | -4.08 (-4.12, -4.05) | -3.47 (-3.54, -3.39) | -4.36 (-4.53, -4.19) |
| 20-54 years | 0.67 (0.65, 0.69) | 0.83 (0.82, 0.83) | 0.47 (0.39, 0.54) | 0.97 (0.96, 0.98) |
| >54 years | -0.90 (-0.92, -0.88) | -0.58 (-0.59, -0.58) | -1.49 (-1.51, -1.47) | -1.28 (-1.34, -1.23) |
| **Abbreviation:** AAPC, average annual percent change; DALYs, disability-adjusted life years. | | | | | |

**GATHER checklist of information that should be included in reports of global health estimates.**

| **#** | **Checklist item** | **Section/paragraph/** **interpretation** |
| --- | --- | --- |
| **Objectives and funding** | | |
| 1 | Define the indicators, populations, and time periods for which estimates were made. | Methods / “Data Sources” section |
| 2 | List the funding sources for the work. | Science and Technology Program of Health and Family Planning Commission of Jiangxi Province (202210918) and the Science and Technology Department of Jiangxi Province (20223BCG74003). |
| **Data Inputs** | | |
| *For all data inputs from multiple sources that are synthesized as part of the study:* | | |
| 3 | Describe how the data were identified and how the data were accessed. | As mentioned in the Methods / “Data Sources” section. |
| 4 | Specify the inclusion and exclusion criteria. Identify all ad-hoc exclusions. | As mentioned in the Methods / “Data Sources” and “Risk factors analysis” sections. |
| 5 | Provide information on all included data sources and their main characteristics. For each data source used, report reference information or contact name/institution, population represented, data collection method, year(s) of data collection, sex and age range, diagnostic criteria or measurement method, and sample size, as relevant. | Available via online data source tools (http://ghdx.healthdata.org/gbd-2021/data-input-sources). |
| 6 | Identify and describe any categories of input data that have potentially important biases (e.g., based on characteristics listed in item 5). | As mentioned in the Methods / “Data Sources” section, the details have been published previously. |
| *For data inputs that contribute to the analysis but were not synthesized as part of the study:* | | |
| 7 | Describe and give sources for any other data inputs. | Available via online data source tools (http://ghdx.healthdata.org/gbd-2021/data-input-sources). |
| *For all data inputs:* | | |
| 8 | Provide all data inputs in a file format from which data can be efficiently extracted (e.g., a spreadsheet as opposed to a PDF), including all relevant meta-data listed in item 5. For any data inputs that cannot be shared due to ethical or legal reasons, such as third-party ownership, provide a contact name or the name of the institution that retains the right to the data. | Available via online data source tools (http://ghdx.healthdata.org/gbd-2021/data-input-sources). |
| **Data analysis** | | |
| 9 | Provide a conceptual overview of the data analysis method. A diagram may be helpful. | Flow diagrams of the overall methodological processes were available online  (http://ghdx.healthdata.org/gbd-2021/code) |
| 10 | Provide a detailed description of all steps of the analysis, including mathematical formulae. This description should cover, as relevant, data cleaning, data pre-processing, data adjustments and weighting of data sources, and mathematical or statistical model(s). | As mentioned in the Methods / “Statistical Analysis” and “Risk factors analysis” sections. |
| 11 | Describe how candidate models were evaluated and how the final model(s) were selected. | As mentioned in the Methods / “Statistical Analysis” and “Risk factors analysis” sections. |
| 12 | Provide the results of an evaluation of model performance, if done, as well as the results of any relevant sensitivity analysis. | As mentioned in the Methods / “Statistical Analysis” and “Risk factors analysis” sections. |
| 13 | Describe methods for calculating uncertainty of the estimates. State which sources of uncertainty were, and were not, accounted for in the uncertainty analysis. | Methods / “Statistical Analysis” section. |
| 14 | State how analytic or statistical source code used to generate estimates can be accessed. | Available upon request. |
| **Results and Discussion** | | |
| 15 | Provide published estimates in a file format from which data can be efficiently extracted. | Results, and online data tools (data visualization tools, and data query tools,  http://ghdx.healthdata.org/gbd-2021) |
| 16 | Report a quantitative measure of the uncertainty of the estimates (e.g. uncertainty intervals). | Results, and online data tools (data visualization tools, and data query tools,  http://ghdx.healthdata.org/gbd-2021) |
| 17 | Interpret results in light of existing evidence. If updating a previous set of estimates, describe the reasons for changes in estimates. | Discussion, paragraphs 1-3 |
| 18 | Discuss limitations of the estimates. Include a discussion of any modelling assumptions or data limitations that affect interpretation of the estimates. | Discussion, paragraph 4 |
